# Supplementary material for: The mechanistic functional landscape of retinitis pigmentosa: a machine learning-driven approach to therapeutic target discovery
Source: J Transl Med. 2024 Feb 6;22:139. doi: 10.1186/s12967-024-04911-7 (PMC10848380; doi:10.1186/s12967-024-04911-7)
Supplement: Supplementary file 4 — Additional file 4: Table S4. Table with SHAP score of all KDT (columns) over all RP mechanistic map circuits (rows). [file 12967_2024_4911_MOESM4_ESM.tsv]

circuit_name	ABAT	ABCA1	ABL1	ACAA1	ACHE	ACLY	ACP3	ACTN1	ADA	ADH1A	ADH1B	ADH1C	ADORA1	ADORA2A	ADORA2B	ADORA3	PARP1	ADRA1D	ADRA1B	ADRA1A	ADRA2A	ADRA2B	ADRA2C	ADRB1	ADRB2	ADRB3	AGTR1	ALAD	ALB	ALDH2	AKR1B1	ALK	ALOX5	ALPG	AMY2A	SLC25A4	SLC25A5	SLC25A6	ANXA1	ANXA2	ANXA3	ANXA4	ANXA5	XIAP	APOC3	APP	KLK3	AR	ARL2
MAPK signaling pathway: ATF4*	-1.6231691066574404e-06	6.35594095261491e-07	1.7120755138788535e-06	-6.668656196757856e-07	-6.167695015760637e-07	6.583693989553844e-07	3.7569441079503273e-06	1.0867781894508122e-05	-8.478791531931233e-07	-4.252833544062877e-07	1.270330224177367e-06	1.0557727840820145e-06	-2.814343761542496e-06	-7.002372011268411e-06	4.062456865326777e-06	-7.583799570947522e-07	4.213425158549345e-07	1.678908111824896e-07	-3.837821771877767e-07	-3.417371070153493e-07	-9.499745081519096e-07	-7.624511744154573e-07	-2.8608532818503625e-06	-2.342960656794833e-06	2.166096715618955e-06	-2.894470370227766e-07	3.2469019126852986e-07	6.737797769181189e-07	-6.364303799071939e-07	-4.311724044247333e-07	-6.931951519184528e-07	-2.160401921558959e-06	-4.134111860243521e-06	1.0934132396475207e-07	2.2401053282936458e-07	-4.105921504042967e-06	5.005987662879554e-07	7.076431899007852e-06	1.7237323195640062e-05	4.493306641933563e-06	9.954790708772296e-07	9.131642384703906e-07	1.924396501481715e-06	5.4886443224961545e-06	-1.1682279161438215e-07	-8.852266361735083e-07	-1.187299931692896e-07	-1.1780890702409514e-06	4.053001914378009e-07
MAPK signaling pathway: FOS	-3.581086839482208e-07	3.369470443043023e-07	5.503663164767791e-07	-6.374677052387063e-07	-2.911780328192685e-07	2.56403567151314e-07	4.259509131555559e-06	2.8480675388129463e-06	-4.0632828101020476e-07	-1.9421230116104545e-07	5.525154024365279e-07	-6.335290534666789e-07	-1.2528239307710675e-06	-2.8750001369415805e-06	4.710841382916873e-06	-2.027528561839456e-07	-1.5307359204256186e-07	6.280775540621453e-08	2.216413332844951e-07	4.613283487536133e-07	4.459506183027672e-07	-2.8228114825307893e-07	-1.0559239068088028e-06	-1.7598073740753814e-06	2.210778872793369e-06	-5.5218909032258575e-08	4.636155519911594e-07	-5.240862898222607e-07	-1.9949451655108646e-07	-2.238056992214543e-07	-3.1427257887629804e-07	-1.1404412527942726e-06	-1.544649837801654e-06	-4.81552780946129e-08	-6.00110193984071e-08	-2.620421668534109e-06	2.428229244769321e-07	2.660143026620629e-06	1.2290962080624993e-05	2.2114636357861e-06	-1.068768984960662e-06	5.096496641747587e-07	6.201203519252561e-07	2.00100410756642e-06	-7.442909398260837e-08	3.105142128314714e-07	8.22521348069123e-08	6.522310538247388e-07	1.980644504275725e-07
MAPK signaling pathway: MAPT	2.797200713144508e-06	-6.051944891818323e-07	4.493112472017068e-07	-6.577608581909189e-07	7.41993964289891e-07	-1.1155857669906457e-06	1.555137123090913e-05	-7.103941170904119e-06	-1.6334926680277655e-06	-9.350970347609238e-07	9.458575809661996e-07	-4.222794818134561e-06	5.4376742096693885e-06	-9.473585402440782e-06	1.0228164206025307e-05	1.4334627332354486e-07	4.526836044880483e-07	2.1998520084907978e-07	-7.799338050565578e-07	1.019342154007711e-06	8.56725415990707e-07	8.86305428123196e-07	-6.543135810819893e-06	6.205496190681558e-06	2.6890710430485938e-06	1.750247079848307e-07	4.958911136876923e-07	3.953517545455895e-06	-1.0717613710846552e-06	8.619308954051437e-07	-1.0701112710271248e-06	3.707302341186502e-06	-1.3298048860022431e-05	-5.844225600331887e-07	-1.5313937194895581e-07	3.050254487467706e-06	-1.019879490233389e-06	-1.4454006749122878e-06	1.0775177737351288e-05	-4.974939888801179e-06	1.2014728236239946e-06	-1.404143307120205e-06	-9.608783141712869e-07	1.5613372383006712e-06	-1.1647538061907145e-07	1.4202221482881344e-06	-2.015323712145392e-07	1.5532882207202622e-06	6.775008022816619e-07
MAPK signaling pathway: STMN1	1.1163999611621886e-06	-6.1514777548986e-07	8.73790367633477e-07	-7.220293274413314e-07	-7.898951183244944e-07	1.0257339365048338e-06	5.937711326410724e-06	-5.317792817230691e-06	-7.208698860619079e-07	-8.164688855715958e-07	-5.557527072597039e-07	-3.016156167217248e-06	3.465528768185526e-06	-1.2518207151680916e-05	8.871354900366103e-06	-1.2541230055684433e-06	7.898311600573323e-07	2.767890536375476e-07	6.069739684784342e-07	-5.463128296916211e-07	1.3422051226495711e-06	-1.0250103926898433e-06	-4.933780195371636e-06	-4.564836448998992e-06	1.629552041623211e-06	3.047169875255476e-07	-4.5861864153721467e-07	4.984626827778654e-06	-1.1814012352938454e-06	-6.251639708472316e-07	-7.342733325339277e-07	1.6408127346575943e-06	-5.100549008182779e-06	-2.610622990989633e-07	-2.372168683415489e-07	-1.2234002839976848e-05	5.251406255481299e-07	-2.5547091499079112e-06	1.1294857595306624e-05	3.720779477269212e-06	1.2467115661787594e-06	1.3160495675861658e-06	1.5008588623297166e-06	9.128332111428302e-07	-1.8300731754837718e-07	1.2106087070258955e-06	-1.2224920940141065e-07	-2.524042645599168e-06	7.751314368227418e-07
MAPK signaling pathway: PLA2G4B	-9.17689707990712e-07	2.674447070134339e-07	6.438963324189111e-07	-2.081323627061004e-06	3.799363166727249e-07	-4.781873287148741e-07	3.072380019267835e-05	-5.270704294902308e-06	-6.033732472696067e-07	-6.301255317711734e-07	5.796368857312729e-07	-2.555175941894824e-06	-8.005531083814624e-07	-6.802259105794968e-06	2.6430711464407542e-05	-1.3288667487535484e-07	3.003595523381168e-07	1.5442944834253636e-07	-4.816670382325239e-07	7.799099163710033e-07	-5.610821935503479e-07	-3.8272192490205003e-07	-2.649550883787007e-06	-2.019954898198679e-06	5.468357390619532e-06	-1.8119288471173442e-07	4.6065888796864404e-07	9.878782705152625e-07	-9.513325704650936e-07	5.920265439301482e-07	-1.7342666340931645e-06	-2.3835014314351584e-06	-1.6525359332169913e-06	1.902241608078473e-07	-2.04146251727867e-07	-5.2108959504760896e-06	3.349685030636444e-07	4.075494911678024e-06	1.96606390838442e-05	4.498517383940823e-06	-4.115390949386838e-06	7.984065551896836e-07	1.0529836898776474e-06	3.468332045631544e-06	-7.409486420296217e-08	5.775350883113612e-07	2.2196904553001295e-07	7.300478260462761e-07	4.205525817918006e-07
MAPK signaling pathway: MYC	-2.171401685560857e-06	1.1189101909433718e-06	1.880319001638971e-06	-1.696470011614954e-06	-1.0972859363951454e-06	1.0124064608978416e-06	1.5045957031765569e-05	-6.648554974021277e-06	7.522627881944462e-07	-4.40925292738489e-07	1.4741589356932308e-06	2.2624589145442663e-06	-5.5586124650769e-06	-9.294150831545924e-06	1.661608887140757e-05	-1.413679948262804e-06	3.433431246591451e-07	1.3204043750612122e-07	5.419050663859383e-07	5.156411205840619e-07	1.351418009666555e-06	-1.1079141139287209e-06	-3.7776943322527305e-06	-3.0744063553291054e-06	6.05897391087905e-06	-3.361247111060751e-07	4.572825181054762e-07	-2.2810400356688938e-06	-8.453318881297748e-07	-5.654501001566164e-07	-1.2407292464025607e-06	-3.675285064098822e-06	-5.867745203089807e-06	-2.3631983341675778e-07	2.107525645137084e-07	-1.402734000268378e-05	3.5083786765709134e-07	7.157035081920269e-06	3.1274970248441613e-05	9.042094197252186e-06	-1.6449564003948903e-06	8.964822734760521e-07	2.267943784370249e-06	4.192682824474803e-06	-1.863065821275571e-07	-9.79039140561307e-07	1.823879199141896e-07	1.420941151195259e-06	6.112605040582606e-07
ErbB signaling pathway: MYC	-2.921382712992177e-07	1.2185961389027258e-07	1.8521126307923554e-07	-9.771087224541773e-08	-8.447434034630129e-08	9.418545468027733e-08	3.11050113236839e-06	1.4997737486881023e-06	9.897427571138925e-08	-6.73101903766885e-08	2.0700743780806082e-07	-2.5652722496742494e-07	-3.817568083880274e-07	-4.726301344679305e-07	3.0540754051489454e-06	-9.010914928343933e-08	6.4632143481581e-08	-1.7079993604068348e-08	1.054916442105167e-07	1.0958309140838233e-07	-9.822125436875837e-08	-1.026950791854363e-07	-1.0657154476892343e-07	2.4518364875873344e-07	8.572051338679619e-07	-7.021586896656499e-08	-5.6976966174644e-08	-1.1128968669654809e-07	-6.599876118474892e-08	1.1286093511869045e-07	-2.5241780938900975e-07	-6.141771196239318e-07	-4.942043550443909e-07	1.157499821907318e-08	-1.5173887543596428e-08	5.991714252407151e-07	1.082386664828901e-07	1.0969156603838002e-06	3.669302676909438e-06	1.1980527679361807e-06	2.005942600962031e-07	9.104390861909237e-08	2.0715149799390534e-07	5.3148617289564e-07	-1.2742737071077692e-08	-1.6797810914526697e-07	2.537511263776095e-08	1.5413839660201266e-07	7.424599833324516e-08
ErbB signaling pathway: ELK1	-2.356092332507415e-07	6.949404209344366e-08	7.554978066586665e-08	8.751219105571834e-08	1.159795673825889e-07	6.862491308142972e-08	1.6374476662780766e-06	2.0623312221741717e-06	-9.687647713734313e-08	-3.6141634347287965e-08	-1.2858496608850514e-07	-2.914667831841157e-07	3.8495220313550723e-07	9.062259123504518e-07	1.9091464493253063e-06	-4.915263357074385e-08	-6.297656791691467e-08	3.305036846667951e-08	1.50268212229734e-07	8.108886048992235e-08	-2.721241930406818e-07	-7.863201463591718e-08	6.240080044639078e-07	5.258128527544297e-07	3.130075471793792e-07	-3.4240648608055144e-08	-7.46689951114203e-08	4.68635489542285e-07	1.4338078205618087e-08	1.478109329559677e-07	-1.5175160469230233e-07	-3.482812237318693e-07	-4.767211803100526e-07	2.1695517268955152e-08	-2.94210962090813e-08	1.4689137508020182e-06	1.1243883667425763e-07	5.439818345779722e-07	1.168375703460479e-06	5.683636057922103e-07	1.7184095554219178e-07	-8.748427218608535e-08	-2.467114683010932e-07	3.872727826450948e-07	-1.3482244169929366e-08	-1.4956742746201165e-07	-1.4062249457369324e-08	-1.552320427554817e-07	6.12447754125146e-08
Ras signaling pathway: PLA2G4B	-7.860605371958785e-07	1.4281347488460558e-07	-5.197167593623292e-07	2.960201970502812e-07	3.84518646109665e-07	1.4966876729271957e-07	3.324990499261905e-06	3.2807674424733333e-06	-1.8630520214222045e-07	-1.0012859931451155e-07	4.576272865585208e-07	-8.422643040728008e-07	6.819204973335361e-07	1.308369105319161e-06	3.687054160775064e-06	1.2701819061800504e-07	1.437783588688073e-07	-1.262446088002576e-07	3.3077026882885536e-07	-2.857339885206321e-07	-6.690740067781641e-07	-2.384695412341713e-07	1.2618363733330778e-06	9.272016147936456e-07	1.5927320764673211e-06	-1.9397651609448465e-07	-2.764154325219096e-07	1.03794668385709e-06	-4.330406558606552e-08	4.210115274945457e-07	4.758417292272937e-07	-1.4992966894027842e-06	-2.116684979466218e-06	-4.945570365727621e-08	-8.209167269180347e-08	5.47252657329231e-06	2.3086198158854078e-07	2.269027243584262e-06	5.350663288891174e-06	1.891797441473818e-06	4.298430127298364e-07	2.3678525700128015e-07	-5.604968642608556e-07	1.8703010603223697e-06	-4.841534324380533e-08	-5.420994933372857e-07	-5.5192099387642243e-08	-4.74390142504369e-07	2.488494937139527e-07
Ras signaling pathway: ELK1	-1.0147778391377902e-06	3.339522135497453e-07	2.949920884345969e-07	3.9172802487803145e-07	-5.377279946391296e-07	5.946097998866756e-07	2.651853528373826e-06	7.498916146572932e-06	3.4630952066284266e-07	-8.456649285042856e-08	-5.127139118668525e-07	-1.0391508340480355e-06	1.0355356862497768e-06	2.4994841390218205e-06	4.510117350480008e-06	-4.662752382587521e-07	-2.828397735979281e-07	-1.9154295647041778e-07	8.817215893868699e-07	-5.639620236080125e-07	-1.0440269973989645e-06	-4.478378355225428e-07	2.714615155693213e-06	-2.557402786091362e-06	1.0289877321601928e-06	-1.2523151392955346e-07	-2.759731736901211e-07	1.2075379267999445e-06	7.909331426857638e-08	4.258246193129836e-07	-3.89525890341751e-07	-1.427426644876464e-06	-2.5228698118404844e-06	2.377495784645752e-08	-9.788465779938395e-08	4.682161562056333e-06	2.479870104903911e-07	1.3514873933592472e-06	3.927293957082141e-06	2.1944249348422634e-06	7.788918324821279e-07	-5.659418664376346e-07	1.1922068006005706e-06	1.1706877103644835e-06	4.781749357521929e-08	-7.004450189805334e-07	-3.4038776643783195e-08	-1.218655575584365e-06	-2.272427958164371e-07
Ras signaling pathway: ETS1	-1.6129806488993291e-06	3.8924434199233524e-07	4.432160208449153e-07	4.936427550617128e-07	4.785647336333829e-07	5.13846910725832e-07	6.217197572844928e-06	9.378871807138197e-06	3.672481614357546e-07	1.1928954675373293e-07	-6.36769284510829e-07	-9.727849010969431e-07	-1.0744847671956222e-06	-1.0410894611051626e-06	7.133486410003388e-06	-2.932342433048551e-07	-2.783375165380521e-07	-2.28283167846934e-07	1.0271711006842058e-06	-3.2096466041543615e-07	-1.0267444405311925e-06	-4.135326094367872e-07	2.3962562562027365e-06	-2.3779129681362048e-06	2.721420647762457e-06	-2.099880801558208e-07	-3.923761075524946e-07	-4.7416678495127e-07	1.364350552258016e-07	5.978005421336168e-07	-5.204842700155221e-07	-2.6158802842722697e-06	4.326740555943637e-06	9.34658094483271e-08	-2.596866083535929e-07	3.538887334696323e-06	3.11499696461946e-07	4.082949836971606e-06	1.3864356753580465e-05	3.4686071945481067e-06	6.755094349707312e-07	7.600078184217615e-07	8.478804938355661e-07	2.933495115955893e-06	7.850821092520706e-08	-9.155907868320332e-07	-6.568076518333876e-08	-1.5228457629613896e-06	3.781618527861934e-07
Ras signaling pathway: BCL2L1	-9.410252510673396e-07	2.838030514720943e-07	2.8029590868893e-07	3.012554084489382e-07	-4.515195693409882e-07	3.943904774057924e-07	1.6517463449936609e-06	5.323802022104592e-06	2.3635660725155802e-07	7.446084354028528e-08	5.093003488491961e-07	-7.14596472714716e-07	-1.3671322036996537e-06	-6.515398822285099e-07	-1.701944287998858e-06	-1.8750142715506737e-07	-1.966415318062059e-07	-1.3185780159541893e-07	7.616425243599405e-07	-2.311317029905405e-07	-7.338288819560773e-07	-3.6647403377631045e-07	2.0550147906054133e-06	-2.004583528390966e-06	1.238505227699487e-06	-1.2437293337804504e-07	2.232490173797825e-07	-7.499584541774938e-07	6.000063033132782e-08	-4.020403162314369e-07	-2.3580812359792565e-07	-1.4419362270655258e-06	4.096926719014918e-06	9.210295914850467e-08	-6.470627287998482e-08	-2.2731728253362247e-06	-2.574471850291669e-07	8.5432894956627e-07	9.31832094241435e-06	2.2273114881328342e-06	1.037164746072883e-06	7.77001801916637e-07	4.657262112334561e-07	1.2130491877321093e-06	2.3355703352793718e-08	2.784899557707347e-07	-1.944959204913601e-08	-9.661356565101742e-07	-1.6652253906787416e-07
Ras signaling pathway: NFKB1	-1.317753032573467e-06	4.360104748288545e-07	8.104439144197844e-07	2.1486341498110066e-07	-3.377783244216166e-07	5.219861128161864e-07	1.751732083194369e-06	8.543457329874609e-06	5.88039845833337e-07	-8.438968549252144e-08	6.647037249613136e-07	-7.603027319648525e-07	-1.597798707417954e-06	-7.051572456941529e-07	-1.1713645079374514e-06	5.724742803155605e-08	1.7277092646317482e-07	-1.5577444366696777e-07	5.525212360423944e-07	-3.281740894313279e-07	-5.802136662008239e-07	-3.065220167053245e-07	-1.8055765134648963e-06	-1.5190270337694637e-06	1.7031017891959817e-06	-1.3012511700768588e-07	-2.141272857891113e-07	-6.344501237712285e-07	-1.2855381279421105e-07	-2.478650714788641e-07	-2.6638574966562785e-07	-1.5511639300579515e-06	2.1014189070993883e-06	-3.5514109083177955e-08	-1.5751039041569658e-07	-1.2180152729466958e-06	-4.1993297256546454e-07	3.36985105773231e-06	1.2134724195200852e-05	2.687971352009944e-06	6.200087653620061e-07	6.097779752961008e-07	4.926471924602747e-07	2.227644714069146e-06	2.6206432585387817e-08	-5.380183715559242e-07	-4.204704439549921e-08	-9.641131371012307e-07	-1.901243827637488e-07
Ras signaling pathway: FASLG	4.581324711059348e-07	1.76777081952262e-07	-2.041849459700836e-07	5.138824784507437e-07	3.784917531089013e-07	-2.861766759928484e-07	1.4567396960124723e-06	-6.696212662743448e-06	2.0796600141081577e-07	2.376286942336565e-07	-4.4878211912573954e-07	9.475782033233686e-07	-7.304218645461803e-07	2.71448926540987e-06	-1.3562330172830768e-06	1.5505281395255185e-07	-1.918610704754364e-07	1.121417173138894e-07	-4.392514655751552e-07	2.613534914943812e-07	-3.901350485893007e-07	-4.0089949102877763e-07	-7.066378186520576e-07	1.476009741980014e-06	-1.1875272918662397e-06	6.066582592945158e-08	-2.542840102155078e-07	2.495892429666666e-07	2.4067069622278373e-07	-2.888937067162289e-07	-2.646736379128181e-07	-4.6880363088652443e-07	9.132419928093691e-06	1.5093211626702781e-07	-7.39099006987136e-08	-4.428116926938756e-06	2.9117077047197895e-07	1.0092808453504509e-06	-3.705688170455225e-06	-1.0052365334690523e-06	7.080506060213324e-07	5.220866040361118e-07	-3.813970993528382e-07	8.644436575738394e-07	9.431947853291161e-08	2.2121399557392437e-07	-6.723538238064247e-08	-9.252464479990886e-07	-2.34483658852446e-07
Ras signaling pathway: PAK4	3.8771710306592085e-06	-1.1114858160025064e-06	1.7507414497466008e-06	2.6102814197872344e-06	-1.573917301780498e-06	2.408081679210057e-06	7.087910449715675e-05	-2.7895722459521565e-05	1.9935618057695588e-06	-5.95431970453789e-07	-2.6951555620328945e-06	-1.082134808240029e-05	7.516643530478283e-06	-7.140900520949822e-06	5.342371379145153e-05	-2.0859674495288505e-06	-9.818413871705545e-07	-1.3300668338749476e-06	3.666426227644904e-06	-2.731664846354496e-06	4.79308037965564e-06	-2.926231376941532e-06	-7.064964560430731e-06	6.0314057555016165e-06	1.4159052598404994e-05	8.226985262468469e-07	-2.2015040052459725e-06	9.468125246489923e-06	-7.643177184617374e-07	2.1757484238008783e-06	-5.0466255844351485e-06	-4.342140824726066e-06	2.645118588229652e-05	2.121208016927432e-07	-7.562170356347737e-07	-2.9429220305480275e-05	1.6033138271677566e-06	6.452567680506865e-06	5.905145570322678e-05	1.914329032098938e-05	4.393783495591325e-06	-1.237758600747155e-06	-3.8045737393881775e-06	7.836525465513696e-06	2.1497633170729105e-07	2.125142765677533e-06	-3.3591960081761055e-07	-1.187955412468515e-05	-1.1596544650141128e-06
Ras signaling pathway: RHOA	-3.5949996383837687e-06	1.3126847376104596e-06	3.141356253064978e-06	3.516699975979656e-06	-2.0928365975413576e-06	2.8437396929754897e-06	7.021953343475453e-05	2.350374447901768e-05	1.8237580447675544e-06	-1.038602414303994e-06	-3.683060233138636e-06	-1.169607311478433e-05	6.580295571863567e-06	-8.198929019677095e-06	5.559425517352446e-05	-1.931281836122669e-06	-1.2589327689066334e-06	-1.6647881129446958e-06	2.309037873819372e-06	-1.9564142561246795e-06	-4.887152065205376e-06	-2.502759112737839e-06	-6.253351525466266e-06	-4.196461574197673e-06	1.9390352094055848e-05	-7.473248603173601e-07	-1.955010692486057e-06	1.267565471360089e-05	-1.6053138965715246e-06	2.4264271000404126e-06	-4.686367241461723e-06	-7.283228245311164e-06	2.886005694027701e-05	-2.2388176864097466e-07	-1.4099376316098077e-06	-3.286148554532872e-05	3.0670199625380364e-06	1.381032259707091e-05	9.541338387862316e-05	2.5638757320904143e-05	6.119261240560481e-06	2.0921736796014213e-06	3.465157289153909e-06	1.187899414498104e-05	2.6843713632704855e-07	3.228900339841347e-06	-4.027564608854863e-07	-1.2022312131676025e-05	8.587492409206753e-07
Ras signaling pathway: MAPK8	-4.48254661052204e-06	1.095431578840513e-06	2.0779526342543413e-06	-3.055149288866149e-06	-1.8956663686506063e-06	1.9873083716322317e-06	1.1252528368642995e-05	1.9100218093942425e-05	9.37126131336154e-07	-2.1241245936342022e-06	-2.6627868805241546e-06	-8.60842132351818e-06	9.135135570413782e-06	-5.648575250667916e-06	7.29734982244581e-06	-1.2756055366122111e-06	1.654823946861725e-06	-6.873802372843383e-07	3.809714320431141e-06	-2.128237855162853e-06	3.685609960752973e-06	-2.374583930440472e-06	-3.67464242257399e-06	5.854556971071608e-06	4.130392971412637e-06	9.91258303665584e-07	-3.2092940290950665e-06	1.319062334444437e-05	-2.864670124435585e-06	2.620086270938756e-06	1.1587604414462595e-06	-2.046286481668001e-06	-8.757970867815935e-06	-2.690338242025889e-07	-1.0678024430708908e-06	7.013883187526912e-06	2.8876740680908467e-06	1.3489100163281133e-05	5.0697501684743e-05	1.2724402020672371e-05	7.319208878011932e-06	2.461465440785203e-06	2.8083413055387677e-06	1.2492485265329212e-05	-3.616920113093686e-07	2.889316927751222e-06	-3.67908886324068e-07	-7.282972941568549e-06	1.3703116648109654e-06
Ras signaling pathway: RAC1*	-1.803725646639409e-06	6.170765760173941e-07	1.0919683549414022e-06	1.735265726926741e-06	-1.0105998519658542e-06	1.3526607865694571e-06	2.5379787121575294e-05	1.4638518199033754e-05	7.094662085552488e-07	-1.054699573010031e-06	-1.3324407526449296e-06	-4.177532157393169e-06	2.768900116874325e-06	-3.9723825882427234e-06	1.945491743759472e-05	-8.760914592029655e-07	7.019752683178253e-07	-6.023360060063789e-07	1.175707605903656e-06	-8.926700679101797e-07	-2.298716459706228e-06	-1.0844444619655462e-06	-2.954321705255045e-06	-2.0385947686026173e-06	7.081048309345615e-06	1.695781844543767e-07	-1.2448370296840614e-06	5.9231269186032295e-06	-1.448247235557446e-06	1.4956471725910648e-06	-1.7737737436432089e-06	-2.7563677644292424e-06	1.1309692385627576e-05	-1.3458861087111317e-07	-7.837370156660114e-07	-5.525844971892473e-06	1.3640320260303656e-06	8.925926994321999e-06	4.04358055807809e-05	1.0185089935398394e-05	3.717879836545061e-06	1.6825986351495752e-06	1.7346472682175109e-06	6.377763913124212e-06	-1.741932723947387e-07	1.4823121390669968e-06	-2.011597624730383e-07	-5.484799976439522e-06	8.455495454016125e-07
Ras signaling pathway: REL	-5.95957013190003e-07	2.712973762240411e-07	3.7647212190359e-07	-2.625248623275884e-07	-1.9619051503917377e-07	3.735156254356096e-07	3.794330179129606e-06	-1.991777875193978e-06	3.980656440246491e-07	-1.2791813754394276e-07	-3.831311522538772e-07	-4.542782280901729e-07	-1.130701038211966e-06	-7.259823949407209e-07	2.6250414474739776e-06	-1.6766203097924673e-07	1.952977558888801e-07	-1.0363629115043056e-07	-1.2422885798426957e-07	-2.971534284255399e-07	-3.904914850493694e-07	-2.2426265581336934e-07	-7.76054790122718e-07	-6.242763783125827e-07	1.2280293598270235e-06	-4.2357086570121526e-08	-1.3036659146541484e-07	-3.118608518080611e-07	-2.2653074831645415e-07	-2.731804324235147e-07	-3.4541554397675177e-07	-4.938898685826093e-07	4.154739535573341e-06	1.1521609331284937e-07	-1.1262986581368808e-07	-3.5426222184924104e-06	-2.0133635250950821e-07	9.6195651083561e-07	8.009822424256709e-06	2.349886381164244e-06	7.216343588109637e-07	1.5251120282261174e-07	4.741079031843354e-07	1.0938110438757746e-06	-2.9749068362343968e-08	-3.2974001739187185e-07	-3.3617423407294345e-08	-1.1878872581892026e-06	1.0983604151002498e-07
Ras signaling pathway: PLD1	-2.30887701079289e-06	1.363063006761102e-06	1.7111875605175384e-06	3.4011168973486546e-06	-1.4076968900881857e-06	9.274614125364772e-07	4.83744757882909e-05	-2.013396646239182e-05	-1.2203918923515924e-06	-1.8265196281668583e-06	-1.3442611339364175e-06	-7.81137730850596e-06	-2.3343219120078644e-06	-4.546975085090843e-06	3.520975061008886e-05	-8.506338672835813e-07	1.4144287541232804e-06	5.513740122052504e-07	8.047873811652129e-07	8.545979057705691e-07	2.6947281274657723e-06	-1.2698866366691365e-06	-3.030948540119118e-06	3.5687510803226323e-06	1.1318974114966972e-05	-5.672936469079845e-07	-2.1116177008046204e-06	8.925064920995144e-06	-2.5849617266484e-06	2.565361469037886e-06	-3.7059925486892174e-06	-4.378776284208436e-06	9.753114896528631e-06	-2.3295740846666985e-07	-1.0889548152424883e-06	-2.072065056691204e-05	3.1942563738406714e-06	1.726187547335996e-05	6.559655398521926e-05	1.8818476434669902e-05	7.971545872372203e-06	1.636827223608288e-06	4.069101489133158e-06	1.1782903815201715e-05	-2.5719554059037505e-07	3.875979364508654e-06	-3.628074792600133e-07	-4.835436913032193e-06	1.3878273724340094e-06
Ras signaling pathway: PRKCA	2.9532276754999104e-06	1.0468057846992817e-06	3.515726104103477e-06	-3.2203454174785764e-06	-2.1053284287905327e-06	-8.726151989179927e-07	-5.748768788587497e-05	7.63290136805787e-05	-5.546885490090269e-07	-1.3385503507352592e-06	1.4580687282742698e-06	5.55448336005292e-06	5.993252046477186e-06	6.5709836535656e-06	-2.801485383192241e-05	1.161393683254313e-06	1.0472616564502655e-06	8.637448312783606e-07	2.659247093405694e-06	1.597562060100671e-06	3.286349129259524e-06	-1.3309343092224303e-06	5.833865722368347e-06	7.745438340570497e-06	-8.981313068886275e-06	2.1500952407427853e-06	-1.2425028921751186e-06	7.723728557174685e-06	-2.3164594606381835e-06	2.492624669279338e-06	5.430811572749843e-06	3.845383241295132e-06	9.156384508569954e-06	2.137420135473562e-07	-4.050696446040949e-07	2.4267742626570827e-05	1.6092634929357212e-06	7.204315181400832e-06	2.8698373452651807e-05	-7.8227611117387e-06	-2.113173794112409e-06	3.1265345205387146e-06	2.226254658763524e-06	7.507855854119147e-06	-4.059956734011423e-07	1.8334217175513128e-06	-2.051722788853707e-07	2.7246531967116483e-06	1.3067446257872052e-06
Ras signaling pathway: D-myo-Inositol 1,4,5-trisphosphate	-6.1324780418135646e-06	2.3895834255653363e-06	4.594337648800209e-06	-8.755533671608334e-06	-2.137769371058771e-06	-2.701878845784117e-06	-0.00013688105919	0.0001524101006947	-1.4109958080257855e-06	-4.074235549335569e-06	4.8607517449758205e-06	1.5175475468659348e-05	-1.0023777057677153e-05	-1.6237322950292282e-05	-7.209826696588528e-05	4.363495782824141e-06	-2.300601526623361e-06	1.5636390836890068e-06	5.610471421212734e-06	-2.203768250839604e-06	8.44524423742322e-06	-2.0704783547029445e-06	1.913695266355798e-05	-2.147162584236862e-05	-1.6017563595296916e-05	1.7290229052818393e-06	2.191912665548341e-06	-3.924095055322269e-06	-6.8728214986572e-06	-4.321964061457743e-06	8.732087732130143e-06	-8.105433492122175e-06	-2.0972049062269653e-05	5.419524604032165e-07	-6.970975603556954e-07	6.628904147040219e-05	2.5103056387888183e-06	2.4329552621947e-05	0.0001013183998334	1.3218631382728648e-05	1.1934057018813929e-05	9.271710175816185e-06	4.229713496028973e-06	2.025193204723821e-05	-9.788382890782749e-07	4.8434100418328125e-06	-2.8648889000079824e-07	1.1391406429558704e-05	3.596448051271471e-06
Ras signaling pathway: ABL1	-3.3206693213089458e-06	1.5964989311665897e-06	3.604421880682706e-06	-3.165430352994276e-06	-3.054672026109773e-06	2.736912204831843e-06	4.8923550187992014e-05	2.0872180218167656e-05	-1.0835732919626073e-06	-1.8525480139480684e-06	1.412659713344559e-06	-4.862405554160294e-06	-4.919588801178732e-06	1.17404724979943e-05	5.837268600749369e-05	-3.6354821307918e-06	-1.9636710287388743e-06	-7.139183520316159e-07	1.969587153081628e-06	2.5129982376254497e-06	2.044243821130822e-06	-1.685587300597914e-06	8.52138456432082e-06	-8.940461171843046e-06	1.0200229044538812e-05	-3.578767403842131e-07	1.6940545777755106e-06	-3.7604774142826022e-06	-3.1628161627509603e-06	-1.8218944688060956e-06	-3.2831592645822456e-06	-3.6212885012198864e-06	-1.5166711814126917e-05	-2.7140773547599414e-07	-4.647407277824225e-07	-1.0846938563272302e-05	6.776818254767609e-07	1.590993452517056e-05	6.475457790193431e-05	1.274508219253726e-05	-4.02850661124136e-06	-2.560210066807068e-06	4.696867310748112e-06	4.886121063606756e-06	-2.396347755959147e-07	1.8839877523682405e-06	3.594184393071154e-07	3.676052770734445e-06	1.752075846869311e-06
Ras signaling pathway: RAB5A	-3.2883086526876285e-06	1.5362927852202449e-06	1.6139833227822643e-06	-2.7913927775697915e-06	-2.904630112223119e-06	2.533658808693242e-06	7.512308883196497e-05	1.7663277116930176e-05	-1.2927750207907147e-06	-1.8235821846036744e-06	-1.5255036802792406e-06	-7.370292386444645e-06	-2.4444676880804213e-06	1.43902555433405e-05	7.741417412454081e-05	-3.230334509791992e-06	-2.274184570837624e-06	-8.654269069846087e-07	2.8590875017215176e-06	3.231550234347532e-06	-2.626532855071451e-06	-1.8673655986470549e-06	1.0285848827994805e-05	1.0575447948826796e-05	1.3462347911446217e-05	-5.554379785040161e-07	1.344529953369406e-06	2.722505136310321e-06	-2.751179169857812e-06	-1.9746120191018182e-06	-5.385306039530292e-06	-5.406019300988092e-06	-1.5216426560452668e-05	-1.956179137994921e-07	-3.326040556769579e-07	-1.2625254094102296e-05	1.153730194875854e-06	1.2302628040284234e-05	5.796934485417296e-05	1.5899479560538668e-05	-3.0374772956807774e-06	-2.873042981401017e-06	5.2062475205972216e-06	4.19969858977317e-06	-2.3329571811184838e-07	2.252066738416509e-06	4.092754986991668e-07	3.627347835887077e-06	1.6625725272506162e-06
Ras signaling pathway: RAP1A	3.9966172725741155e-08	-1.6238473601140545e-08	7.470656259607165e-09	-2.419172204847308e-08	-3.5560279383316034e-08	-2.60997381653898e-08	-1.9381435522236842e-07	-2.802521129305139e-07	-2.13632154677155e-08	7.006243273434198e-09	1.6322869654126803e-08	-5.172493122485909e-08	9.081298189722605e-08	7.323949440334973e-08	-1.3843278495494673e-07	2.8910834344600472e-08	2.254846334131597e-08	1.4604830887342361e-08	-3.0798460113565926e-08	8.419036614005307e-09	3.941044525620343e-08	2.9644091364309244e-08	5.7490103514923336e-08	7.121876405124426e-08	-4.3642015306685096e-08	4.26062561097497e-09	-1.350975614756417e-08	7.182428617939577e-08	9.162997924507482e-09	-1.275686707257171e-08	9.461388717119002e-09	2.9394911568735032e-08	2.2384870141657746e-07	8.309544432929225e-09	7.3805140316748085e-09	-1.1076041741689864e-07	1.993312911041547e-08	3.767519413680836e-08	-3.1232450380233614e-07	-3.801789745076071e-08	2.484280115586842e-08	2.190553345939169e-08	-4.210113938432815e-08	4.5905709289388665e-08	-1.0154669712743362e-09	2.2184742718210072e-08	-2.008590692331392e-09	-4.0653134200497215e-08	1.4739751350613562e-08
Ras signaling pathway: RAC1**	-2.3567940671406848e-06	5.982886060064826e-07	1.3443765114253503e-06	9.785369212319725e-07	-1.0797466398759463e-06	1.2502969955067537e-06	4.2083810872992704e-05	2.310725533665828e-05	6.31889159254221e-07	-7.261918058111011e-07	1.237112216997921e-06	-3.539864512462242e-06	-1.5621600560076049e-06	-6.725711129181788e-06	3.625921667830021e-05	-9.338565832368058e-07	5.225631436863438e-07	-5.498284910526319e-07	1.241806616289988e-06	-8.491092630706313e-07	-1.5843136244806225e-06	-1.133327524187377e-06	4.908437172592824e-06	-6.1711134451092965e-06	8.985123519976873e-06	-3.0509755320629854e-07	-9.31841866822588e-07	3.95094470740466e-06	-8.277032155534791e-07	1.1031438000498237e-06	-3.399928956615371e-06	-5.723375765386641e-06	-6.757846661424909e-06	-1.6425914575307006e-07	-5.758166829846282e-07	4.241776331282448e-06	7.689259510355076e-07	8.25718585371822e-06	4.213927530193506e-05	1.299243441484986e-05	3.3116471909908355e-06	2.3475815169118403e-06	1.944323015227097e-06	6.546212289881606e-06	1.1443940910156175e-07	1.3858380876156612e-06	-2.5702206344560855e-07	-2.944590501076257e-06	9.106235701704376e-07
Ras signaling pathway: KSR2	-1.7880429224169552e-08	-7.896648910825318e-09	1.9428080619672045e-08	-2.0003283924222333e-08	3.4573178907763554e-08	1.1007200592834086e-08	5.256409713382206e-08	-1.4035208549453206e-07	9.8200956117308e-09	-1.1508143126100249e-08	1.522478196832637e-08	-3.3722866103325824e-08	1.4075662044756905e-08	-4.299721346665919e-08	-5.646893925878625e-08	1.6269166331070912e-08	6.1204014196704246e-09	3.0258114934496167e-09	1.1075991917011782e-08	-1.0634500831876962e-08	1.939942553678812e-08	1.0174242405022909e-08	-2.3386005828433953e-08	-5.480054891939999e-08	2.1229324337007968e-08	1.5437365431658446e-09	1.5281112062269183e-08	2.434790282869543e-08	-1.739243188675675e-08	-2.055190742887689e-08	-1.0724683288269484e-08	-2.2419754804739023e-08	1.0960327687183639e-07	3.666725311659532e-09	9.335697610685054e-09	-1.7502418556172073e-07	-1.1100639984495671e-08	1.1778217421146507e-07	2.637055607897344e-07	5.965722108970544e-08	3.3748231343798646e-08	1.4229422232804086e-08	-3.14963561931595e-08	8.941468418991536e-08	-2.517062217265852e-09	-2.3183835480098964e-08	-1.9812241407862006e-09	-2.186875311534924e-08	6.9050734878122e-09
Ras signaling pathway: STK4 STK4	-3.994130947736504e-06	1.8091925116098409e-06	2.75154954691272e-06	-1.809533181335674e-06	-1.7529968038513898e-06	2.008109418551268e-06	2.961270760821597e-05	1.1974200996370436e-05	4.210760543690191e-06	-4.148315090977398e-07	-2.168333843131988e-06	-3.453242638355732e-06	-6.5915833282863575e-06	-8.32140314777486e-06	1.6142660731257686e-05	1.676084594060114e-06	-6.803494402424102e-07	-9.367253380162992e-07	2.125602047763069e-06	-1.9152571896341466e-06	2.780958111090812e-06	-2.236761252932856e-06	-6.6632074262799084e-06	-5.278433365722639e-06	8.098371708458336e-06	-5.634038943785835e-07	-1.2273288047138389e-06	-1.907205976869382e-06	-6.747553880977544e-07	1.8608689094064407e-06	-2.125388710402633e-06	-9.169302106496466e-06	4.8904499815898045e-05	1.1071138134187589e-06	-2.616638377761587e-07	-1.984617705162721e-05	1.4199345042719274e-06	1.5208888702720142e-05	4.593513566279531e-05	1.2561991432892594e-05	-2.2755961214043554e-06	2.795314576780707e-06	1.9896058132391748e-06	1.1006858320577494e-05	1.2322704536698126e-07	-3.000780145688517e-06	-1.992586872519605e-07	-9.14802842342892e-06	8.050860315601886e-07
Ras signaling pathway: MLLT4	-4.392567032540891e-06	3.066182152609202e-06	5.698649647277055e-06	-7.137157977102994e-06	2.3266012566914438e-06	2.3897933127190385e-06	3.776081094967398e-05	-2.4772467049335648e-05	-2.176935920760456e-06	8.151189036506294e-07	3.071168889966929e-06	8.209115435801426e-06	-1.197607331101732e-05	-1.748714227142197e-05	3.2174601638256576e-05	-6.941663752620733e-07	2.177264060296044e-06	1.2587413546102423e-06	2.7626918762627924e-06	-1.5684073930070589e-06	7.802093904071482e-06	-2.126884302180265e-06	-1.0054684364109052e-05	1.0664396070453554e-05	1.1921002388736591e-05	-7.66834645481674e-07	2.1860547856944865e-06	-1.0718775392144568e-05	-8.960390267396401e-07	2.165165881992133e-06	-5.560725503284654e-06	-4.802020133280541e-06	-1.1467242790801504e-05	1.0381693388011797e-06	5.727108594213781e-07	-2.4650617690406558e-05	1.5559022848652791e-06	1.4212643818570044e-05	0.0001053049447246	2.781937007120424e-05	2.193859282448405e-05	-2.1286829629510718e-06	2.895705134302376e-06	2.0542694878180435e-05	2.665523477723347e-07	2.407487264196668e-06	5.879956470086114e-07	6.7114776850573495e-06	-1.1771320882708308e-06
Ras signaling pathway: RASSF5	-9.108737549226962e-06	-5.569377319476067e-06	1.110523623483482e-05	-5.603158145778946e-06	1.0646337948982812e-05	-7.505723018767368e-06	0.0001345252603144	-0.0001760379713323	7.4459842149380145e-06	-4.207262439372774e-06	-7.290735716341823e-06	-3.045195576412161e-05	1.6088501406417467e-05	-5.532909976262163e-05	4.696346265285023e-05	1.0587632061430046e-05	3.938429290855592e-06	2.3498317346561003e-06	9.870812131488904e-06	-4.371098646689271e-06	2.223659929006742e-05	1.1053085798981264e-05	-2.781037693229364e-05	3.5245694423176404e-05	1.807502183602045e-05	-3.307579653409511e-06	-1.117091484075782e-05	2.6471553814897575e-05	-5.921868291875196e-06	1.2097830108063618e-05	-8.761249227412472e-06	-1.9572270639308363e-05	0.0002694471921129	6.61312889105781e-06	1.0629036480812407e-06	-0.0001161096643984	8.215887841176729e-06	6.014557962901637e-05	0.0001270842103778	3.435059863553408e-05	1.0615498548835484e-05	8.726024589455205e-06	-1.3221879648402244e-05	4.266319299881551e-05	-8.796118788712191e-07	-9.332329607100932e-06	-1.4035783027453929e-06	-2.6402099948392467e-05	4.562995877168785e-06
Ras signaling pathway: TIAM1*	1.982987553402065e-05	-5.750716453830333e-06	4.922853762440189e-06	-3.6727580802766183e-06	3.3603229448413198e-06	-3.132062122149621e-06	0.0002244113483178	-0.0001471340066267	-4.164678500067352e-06	-1.1991393680086037e-06	-6.431185597033453e-06	-4.573228089999732e-05	4.587073599384591e-05	3.0273120376684277e-05	0.0001734039780478	-3.399552069140762e-06	2.0807208454781183e-06	-1.947760416194753e-06	-5.182107475948056e-06	-6.129639757243629e-06	6.034066462274817e-06	-5.533210185845375e-06	-2.1439693799403e-05	3.5709748075982216e-05	3.237391284472323e-05	3.151856469260638e-06	-3.4527791933619427e-06	4.35639155605502e-05	-1.3311211680761715e-06	-9.014739886970736e-06	-1.3533358680895776e-05	1.1566881942457012e-05	4.287782302568314e-05	6.070644873001191e-07	-1.62626693729938e-06	-9.983319966723838e-05	5.021025055977559e-06	-1.0782023031042234e-05	0.0001130793315332	5.779864575135506e-05	-8.246677781027944e-06	-1.2086131106508072e-05	-1.1975179229215184e-05	8.197534726503537e-06	-7.735145142205708e-07	1.2249577752432282e-05	-1.1237867058023948e-06	-2.1436740041580705e-05	-5.491841710910033e-06
Ras signaling pathway: PIK3R5*	1.849130433579695e-05	-5.152785961224096e-06	5.8238596717048985e-06	-8.657476633589583e-06	-8.618011995450289e-06	-4.695399858294553e-06	-0.0001190011763549	-5.310270480028727e-05	-4.3673106193010924e-06	-5.691434229840892e-06	8.925152859192184e-06	-3.732388110411616e-05	7.100192433037509e-05	2.557900643811528e-05	-9.420576917244307e-05	1.4378802858198684e-06	3.9478683562720525e-06	2.3709722701927625e-06	1.1958660693179363e-05	-4.18745512506583e-06	1.1656995419626676e-05	-4.8773692796750905e-06	-1.4117520402570236e-05	4.1056022224498224e-05	8.409928238503348e-06	4.986371768428439e-06	-1.0641440513977231e-05	7.779672628926453e-05	-9.274248697322516e-06	-4.884620749116093e-06	1.6732094989429274e-05	1.6744460293119928e-05	0.0001173293716925	3.4642470855054845e-06	-2.3372665535811385e-06	-6.765838876461511e-05	-9.119061499096512e-06	2.3425922189573725e-05	0.0001321559349728	-4.93945515610523e-05	1.0168173444935865e-05	-6.988525060432188e-06	-1.3684369749165698e-05	2.458777484389865e-05	-1.5003678332384618e-06	8.991689187398239e-06	-1.5149794090136985e-06	-2.0871040529973387e-05	5.301475105196276e-06
Ras signaling pathway: MLLT4*	1.2468457753027511e-05	-3.169862028890253e-06	7.76047337647717e-06	-1.2267160733902651e-05	4.944134484730968e-06	-5.015228941898362e-06	-3.543610457334286e-05	-0.0001288061798174	-9.38110677293546e-06	-3.8068349673744343e-06	-6.869685161867644e-06	-2.0438901256795207e-05	4.135978632099021e-05	-1.2122398591617793e-05	-2.3953203858760065e-05	3.4802999242067875e-06	4.977844968639353e-06	3.5979563029592743e-06	-4.875037281684575e-06	4.37891099753872e-06	1.7584582464537265e-05	3.6533944276098894e-06	-3.939536374486671e-05	5.4699118171629904e-05	-9.636652821574282e-06	1.7499250468214832e-06	-3.366578943161786e-06	3.505835722827351e-05	-5.453937501906754e-06	-3.689100853686198e-06	4.317703868568973e-06	1.8331331785126392e-05	4.8030874046500696e-05	3.768376989744497e-06	-1.1327341415277162e-06	-6.052957437673585e-05	4.938607070563092e-06	2.256609476713449e-05	0.0001097722934624	-3.115383571736074e-05	2.319973992758372e-05	-8.952781664821518e-06	-8.4745395589813e-06	2.830767629456433e-05	-1.0205624653289837e-06	7.635725779464074e-06	-1.0791249339587808e-06	1.264346172664514e-05	3.660729847494102e-06
Ras signaling pathway: RAF1*	-8.02907502976534e-06	-5.45702478911881e-06	4.3612235701981824e-06	-4.597462973364547e-06	4.817775153396894e-06	-3.7771519013613895e-06	1.3557531633488354e-05	2.8843227640317317e-05	2.3943549262911448e-06	-3.587029265424628e-06	-4.655166951025367e-06	-2.305434530686588e-05	3.804202686990144e-05	2.2114568693123736e-05	-1.311635535929099e-05	1.5676269010196157e-06	3.948181741533759e-06	1.5327937646286465e-06	-3.466627399569272e-06	-5.988005784406615e-06	5.737234598638485e-06	-5.097120235483772e-06	-7.286127901855012e-06	1.5823716121366058e-05	4.818133049116948e-06	2.5689986132162816e-06	-6.304802469459836e-06	4.206052499913914e-05	-4.231530406695082e-06	-5.362905082991747e-06	3.5847275949386985e-06	-7.626404662753553e-06	0.0001143359714972	4.469026889114289e-06	1.3408417047478704e-06	-1.720417808216441e-05	4.656134955960943e-06	2.0378347824202858e-05	5.0675719352170806e-05	-2.4643897752712134e-05	5.871195718866408e-06	-3.893460185385347e-06	-7.603088119668448e-06	1.8280541803839188e-05	-7.001707046473907e-07	4.645428695544531e-06	-9.90910089831409e-07	-2.9127478629898516e-05	4.041842651892189e-06
Ras signaling pathway: BRAP*	-6.601919646198928e-06	-2.5100517074746995e-06	3.744612822368555e-06	-3.5697916543070788e-06	1.8770456034756904e-06	3.668875301497509e-06	4.399759791548246e-05	4.273118761776714e-05	1.473887780793063e-06	-2.186988473908415e-06	-3.7924164038693673e-06	-1.5066658472267158e-05	2.660529047924313e-05	1.2567869138171022e-05	3.910479320871908e-05	8.881124789488924e-07	3.1929129319859065e-06	-1.0723566593033736e-06	-1.8339867088509973e-06	-4.379066956030331e-06	-3.7921680322134175e-06	-2.186892338739255e-06	-8.166052142886826e-06	5.277758383767663e-06	7.31516259523077e-06	9.749783493089183e-07	-4.233358994002326e-06	2.8433471744481803e-05	-2.513248123015379e-06	2.8012416016339343e-06	-2.8660546452993246e-06	4.524451732091769e-06	3.172682562027313e-05	8.381144892753352e-07	-7.546638661057257e-07	1.0147222513400756e-05	2.2513152466088e-06	-9.568042201700922e-06	3.101138452564915e-05	-1.811898806124523e-05	3.5637002236676724e-06	2.2528807975245685e-06	-4.1842809678602255e-06	-7.448910333443212e-06	-4.936169360568782e-07	-3.7546328538697216e-06	-3.214402110350289e-07	-2.17626375144669e-05	2.785316130431735e-06
Ras signaling pathway: RALGDS*	1.6988256289562063e-05	-9.617470648783031e-06	1.0306201501102744e-05	-1.1180183407015998e-05	5.56758578152484e-06	-6.53181376566144e-06	5.039388243640573e-05	-0.000105207155313	-3.66843380949407e-06	-5.989213256175849e-06	-6.450595549000679e-06	-4.745023134873327e-05	5.857242426250029e-05	2.059442116521671e-05	3.617529932446883e-05	2.5951612240437934e-06	5.961849942065449e-06	1.938803199084665e-06	-7.122498447370698e-06	-4.612117038412093e-06	8.553692963013268e-06	6.471484256880029e-06	-2.5851677712860437e-05	4.429585772053215e-05	9.07227558666166e-06	3.747377720599952e-06	-6.674213297969679e-06	5.758207205920492e-05	-8.843603960069844e-06	-7.424872854326704e-06	-4.445550450178019e-06	2.045653979631494e-05	0.0001341732385891	4.6959135889623285e-06	1.078464519558449e-06	-9.746194843787124e-05	5.459758207778307e-06	3.9264504734620834e-05	9.43161564412795e-05	-3.7471367262917365e-05	-1.1108351685824987e-05	-7.8936184634227e-06	-1.2625639247622311e-05	2.5963268084851263e-05	-1.2288957154053305e-06	6.1378105910392175e-06	-1.585613505328203e-06	-3.569150152272509e-05	5.863491396824919e-06
Ras signaling pathway: PLCE1*	1.0581369221040753e-05	-4.4414570753737465e-06	7.292620118304393e-06	-1.3278510566691092e-05	3.158992939044828e-06	-5.702918528646132e-06	-0.0001552128193879	0.0001066358999156	-3.0698326570548145e-06	-6.734775986749096e-06	4.858778335329216e-06	1.7314697158404147e-05	3.032107945860105e-05	2.557534832459945e-05	-9.04070384744715e-05	6.5981923747940894e-06	3.586351665564591e-06	3.198950632573389e-06	4.351558469995626e-06	-3.306280886754084e-06	1.4767121983547582e-05	4.805760959931141e-06	1.547860349420394e-05	1.6467156760202892e-05	-3.073641992766973e-05	5.340448607167726e-06	-2.7775937290695832e-06	3.361151063733523e-05	-9.4295571757239e-06	-5.355286518150923e-06	1.3645360832078066e-05	1.2108590853648207e-05	8.81849859098901e-05	4.396297534250983e-06	1.4168001525400037e-06	2.900631852407964e-05	6.223164877770678e-06	2.423554221704486e-05	7.335191636797676e-05	-2.524135420769436e-05	1.1911972461281213e-05	9.208435681181444e-06	-9.411147957609994e-06	1.958308538273053e-05	-1.6144406768736915e-06	7.284339892470102e-06	-8.531353193994096e-07	1.0264185623170055e-05	5.681685526981795e-06
Ras signaling pathway: RIN1*	-9.758921294971192e-06	-2.402435499617792e-06	3.475180020786249e-06	-8.577230460334167e-06	-5.816489870442051e-06	5.146667344710125e-06	0.0001828367269933	-6.631807920853644e-05	-3.751600292492089e-06	-4.687383842820472e-06	-4.444617237048631e-06	-2.420900274973536e-05	1.4976062783714968e-05	5.150644721415347e-05	0.0001862666485247	-5.560503560091117e-06	-5.460284004337112e-06	1.6559983258345645e-06	4.630493864846803e-06	7.445783361924457e-06	-6.636143077955415e-06	-3.6690638013003465e-06	2.739367097611383e-05	2.9455831422733363e-05	2.4800515637319565e-05	-1.6305365440797506e-06	-2.843452113090252e-06	1.6447007874752425e-05	-6.479947454490139e-06	-4.553501943333709e-06	-1.1980350334637382e-05	-1.0053495703840876e-05	6.661051539552537e-05	1.2860345973609691e-06	4.714338044047524e-07	-4.942866383856011e-05	4.55374536925188e-06	2.74893830997816e-05	9.099903475383136e-05	3.34770534826064e-05	-1.1440207619546191e-05	-8.510879975934151e-06	-1.3625945469218154e-05	7.439561110759045e-06	-6.447813439571563e-07	5.436294868890818e-06	8.677721325795184e-07	-1.294337747443521e-05	4.335316887819059e-06
Rap1 signaling pathway: MAPK1	-1.9746187348785545e-06	-4.1624411615239386e-07	-9.270861454404564e-07	1.9722843112444144e-06	9.983491256606485e-07	7.029378565452841e-07	1.2036474388417364e-05	1.6776517229430967e-05	-8.630285587083258e-07	-3.316543166964948e-07	-1.256884935967686e-06	-2.675795786299316e-06	3.90677089761486e-06	8.314634055548324e-06	1.448271451474105e-05	-5.42868522612556e-07	-5.92247196555502e-07	-5.767405359504623e-07	1.4218132776157822e-06	-1.1621034943881273e-06	-3.344197431120733e-06	-9.70670285143062e-07	6.505257286299588e-06	4.727675463832241e-06	3.739846756166361e-06	-3.329894004079827e-07	-1.0671267782116226e-06	3.4872277777039497e-06	-2.592582344898482e-07	9.729329629926938e-07	-1.4422418366932336e-06	-3.3916436906235803e-06	-4.752931917723973e-06	1.2700009672333436e-07	9.448510506134607e-08	1.4700740913978402e-05	1.1866592359312636e-06	3.555539754165107e-06	9.426883826634164e-06	5.5658682817169735e-06	1.6428154314372328e-06	-9.96626249781302e-07	-2.1930037969576557e-06	1.6508500177040095e-06	-1.5612890030206353e-07	-1.5744130206314194e-06	1.0858022283846957e-07	-4.304491422445546e-06	6.272367459553244e-07
Rap1 signaling pathway: PLCE1	-5.232926964747694e-06	2.047067821557433e-06	3.074154057724207e-06	-7.862469749159271e-06	-2.3026630578909365e-06	-3.644815518561223e-06	-0.0001355464399478	0.0001100388370548	-2.064253074644845e-06	-3.8113633086015513e-06	4.077487404627691e-06	1.6701349461504322e-05	-9.491130257677489e-06	1.4949612363623483e-05	-7.291817941551932e-05	5.26764682096595e-06	-2.105865071757305e-06	2.100077928168682e-06	2.57607492310558e-06	2.604197884749757e-06	8.293636931775214e-06	2.6485296186017786e-06	1.459045400189992e-05	-1.3180725348010948e-05	-2.1456951161860624e-05	1.6616810149422651e-06	2.505793365598365e-06	-5.116656168758771e-06	-5.95532526276935e-06	-4.4773613241819465e-06	8.986928986363692e-06	6.190214258625759e-06	2.082150796414165e-05	7.33892050262528e-07	5.012613866370076e-07	6.246914114440114e-05	3.026112749532352e-06	1.8887669430070104e-05	6.346806008045458e-05	-1.8007116470647216e-05	8.982071495326672e-06	6.34551572304067e-06	4.600505940852233e-06	1.101348547726548e-05	-1.0425535475627856e-06	4.36184992960884e-06	-1.7757028931845253e-07	1.3717847408071808e-05	3.197376728183353e-06
cGMP-PKG signaling pathway: GTF2I	-2.260718674329903e-05	4.994463040149688e-06	7.180279683985858e-06	-9.902812673508625e-06	4.359760568780422e-06	-3.958367448642291e-06	-0.0001350104955838	0.0003072964421615	-3.1084197743625573e-06	-4.928716059056449e-06	1.562619245900546e-05	1.9297963765986595e-05	-2.9626485449764423e-05	-1.060485923896985e-05	-8.904189776415528e-05	6.309473365271796e-06	-2.6913590197704458e-06	1.6444322971553245e-06	6.5937515128962055e-06	9.05288049338968e-06	8.197721642036361e-06	-2.8934858359601257e-06	2.4987951647615097e-05	-3.00878060032879e-05	-7.027661672147336e-06	3.015678624482097e-06	4.791617523345927e-06	-2.129676883025744e-05	-8.679798719418715e-06	6.421591198081579e-06	1.4467184258546325e-05	-8.016707784765222e-06	-5.690768845504943e-05	3.3694297099633644e-06	-4.066366090097519e-06	0.0001528940115756	-7.93395477114577e-06	4.807164544317679e-05	0.0002050167640901	3.12441784325271e-05	-1.0041513231450588e-05	1.1487483360096064e-05	8.682960667896098e-06	2.5146820345849755e-05	-9.023476206649368e-07	5.435315559462519e-06	-4.000405149815579e-07	3.721411033371263e-05	5.957937988107858e-06
cGMP-PKG signaling pathway: CNGB1	3.699525169520007e-05	1.2099772692841916e-05	-9.08008068961954e-06	1.607850972980922e-05	2.7849283552743965e-05	-1.1338787682760438e-05	0.0002216580727417	-0.0005061911949625	-8.28723931331771e-06	9.657546560729224e-06	1.619232367560098e-05	3.1151926243150694e-05	3.1102512879937326e-05	-0.0002182273019879	0.0001854572958081	7.498680226771992e-06	-2.126973603366996e-05	6.944267489220044e-06	3.5715812181489014e-05	2.07163617713369e-05	6.12402684026979e-05	2.838651705001216e-05	-0.0001268240224935	0.0001721123945023	2.2961971626539357e-05	3.325409019136045e-06	3.687774033460589e-05	2.366546703636594e-05	1.6111586489095725e-05	2.0648176553973528e-05	-1.8054556141916706e-05	4.784803907041437e-05	-0.0001751237357147	-1.2982224501390784e-05	1.7653184983762131e-06	-0.0002579236988144	-1.4432538249828024e-05	2.5404662402834365e-05	0.0002514630428331	5.76275500959426e-05	4.442345028048424e-05	-3.935862035722837e-05	-4.548830896030708e-05	2.018856852913599e-05	1.5059815295141614e-06	-1.335582742660844e-05	7.005005054966822e-07	4.345869436808463e-05	-1.162443011675296e-05
cAMP signaling pathway: BDNF	3.6513635747064057e-10	-2.3984225837898207e-10	-2.8175367862218463e-10	3.6648142548759045e-10	-4.2945986924278886e-10	-3.5057504348896027e-10	-7.870179305028318e-10	-2.077918444249841e-09	-2.6272873925909965e-10	9.222119220421612e-11	-1.6795758321740578e-10	-8.271496923243277e-10	1.6246273147655695e-09	-3.377574623856537e-09	-1.292632456383852e-09	1.1656726447029588e-10	-3.1697085975689544e-10	1.403512127379657e-10	1.1062781755937296e-09	5.292211319387354e-10	1.028709399690207e-09	-2.932039713357921e-10	-1.2630213786179766e-09	6.405641574130676e-10	-6.579713498862007e-10	1.0677635290442684e-10	6.404166173734714e-10	6.559850835027693e-10	1.2515966708207827e-10	-5.321238760877694e-10	2.2565998995884736e-10	8.558274273310631e-10	-8.321356483819577e-10	7.279589203553921e-11	-7.999866521623617e-11	-7.007134819266814e-10	-2.2281760141376672e-10	-3.160785953348807e-09	-2.919799671643065e-09	-1.7524169081712851e-09	-3.1917928185888915e-10	-9.62499909818903e-10	-9.82007963472311e-10	-2.227119720385806e-09	3.93288975846786e-11	4.293995625284151e-10	4.55152842593764e-11	3.1848265315681584e-10	-3.27389751062421e-10
cAMP signaling pathway: FOS	1.402159832394073e-09	2.5535301076509173e-10	-5.203038350701261e-10	8.266584193863566e-10	-7.374584596851049e-10	-7.400948872620761e-10	-4.6939579545378065e-09	-7.1286117860970965e-09	-6.700334956717253e-10	5.075565167380701e-10	5.424382281009347e-10	1.4493640727213154e-09	2.989538495339092e-09	3.5664865139859742e-09	-3.877943368700265e-09	2.9053222778287987e-10	-4.470926286551329e-10	1.4363579327574038e-10	5.571279404220908e-10	6.275923704762694e-10	7.516476835224236e-10	6.276286342365466e-10	-1.6425530797177502e-09	3.7014372915110304e-09	-1.2624171444484606e-09	2.5351967791171915e-10	4.2403463151051357e-10	1.5275039342695522e-09	8.332159434020103e-10	4.291772908697935e-10	7.344086965174343e-10	1.9091964451178043e-09	-3.3070913758277547e-09	-1.062235991601442e-10	-1.2953656096900926e-10	-4.406807902804521e-09	-3.121334985199983e-10	-4.654023436066941e-09	-7.160457617211048e-09	-2.3647195186648387e-09	-9.334622531241643e-10	-1.0941752982342783e-09	-1.2221563651489528e-09	-3.0708472147444964e-09	1.2609704751050978e-10	5.990957838359866e-10	6.304191245408019e-11	7.855551163930444e-10	-4.786513563561454e-10
cAMP signaling pathway: JUN	1.3450848785190616e-09	2.84120893886282e-10	-5.013128745387897e-10	7.23481498604107e-10	-8.624186644831273e-10	-7.308703231863534e-10	-5.757270920638544e-09	-7.647012002727388e-09	-6.802469994777771e-10	5.466186393297144e-10	5.687590147049065e-10	1.4251677262108783e-09	3.1731648553407037e-09	3.5968871310056405e-09	-4.554996753526511e-09	2.852229495467699e-10	-5.155412974676746e-10	1.4870939726115294e-10	7.165389315233507e-10	6.909503378810711e-10	7.71240336011114e-10	5.733072834555167e-10	-1.7644859665692666e-09	4.0394320693713765e-09	-1.4392171631303787e-09	2.3321010065045207e-10	3.7384352617467904e-10	1.7611176990157855e-09	8.70301531803461e-10	4.5810541252585184e-10	7.86646241418483e-10	2.0524792927923453e-09	-3.803242186868447e-09	-9.893629438124911e-11	-1.1938338299802234e-10	-4.6875708140767835e-09	-3.9373214505757067e-10	-5.473733746724786e-09	-8.529316496569733e-09	-2.675106350269435e-09	-8.21590838404631e-10	-1.246923893692398e-09	-1.3386327641751431e-09	-3.5262824544001892e-09	1.1117849854148355e-10	6.438967625627268e-10	8.719839483217316e-11	8.86895598031375e-10	-5.534225030033532e-10
cAMP signaling pathway: CREB3 CREBBP	1.4654074237155506e-07	2.7641979823223586e-08	-1.0262280634450164e-07	7.358612216558824e-08	-3.7834971907080584e-08	-7.076063402519158e-08	-4.483014349258433e-07	-6.786389821047045e-07	-5.8642330987171255e-08	6.925220705298833e-08	5.186058848875422e-08	1.1558776590836882e-07	3.354372818284557e-07	4.414139026694773e-07	-3.929456072026944e-07	1.7024973287228297e-08	-5.1974693785389183e-08	-8.637449431112588e-09	3.965228871887474e-08	5.960503149146764e-08	5.8490753704806826e-08	4.1958753630095265e-08	-1.596117988834047e-07	2.724348992480877e-07	-1.995092473004976e-07	1.6255202008751588e-08	3.2158020879183633e-08	-1.1684168563293289e-07	1.1146264628324507e-07	-6.281240396424101e-08	5.704555418158224e-08	3.217242084522661e-07	-2.486641230336332e-07	1.675242536776617e-08	-7.383283693733051e-09	-3.007310590530529e-07	-8.462748114625787e-08	-1.279561553546632e-06	-1.6583801969103017e-06	-3.7476872633465154e-07	-8.217230657271496e-08	-1.330810435578435e-07	-1.571158633594463e-07	-8.768413839137459e-07	1.2148441778190357e-08	5.550760609438248e-08	2.213803285960268e-08	7.825206073868766e-08	-6.7680082553574e-08
cAMP signaling pathway: MYL9	-1.0255504319369091e-06	2.3394543294551853e-07	5.52670837671698e-07	-4.50117137115774e-07	-1.7648198766280305e-07	2.2012227927259323e-07	-1.975385791268099e-06	1.2731401828730977e-05	1.575908393311864e-07	-4.000448215566957e-07	5.695671833302089e-07	9.267924549427824e-07	-1.4255960851231154e-06	-7.430046652360947e-07	-1.2156557739202848e-06	2.478963083039905e-07	1.8506767450390901e-07	-7.070329670653646e-08	3.937987224839213e-07	2.2608804841283218e-07	2.70495326560387e-07	-2.9193530034184826e-07	2.182335951066442e-06	-2.485113359890877e-06	9.663386041558376e-07	-3.1853692551546373e-08	-1.527203736818696e-07	2.8061180836417495e-07	-6.813074861693057e-07	2.8934239095982736e-07	2.2322392388887847e-07	-1.753892444310561e-06	-7.363999563751265e-07	8.02934715344143e-08	-1.3055348446978252e-07	3.7398690192200714e-06	4.129672061261786e-07	5.064820887588738e-06	1.3906323762680772e-05	2.3330641939719205e-06	8.208892043919768e-07	9.072289811896814e-07	8.262048744946342e-07	2.1966042587370943e-06	-8.180769572090383e-08	3.991427473074651e-07	-4.372295961893327e-08	8.294825118545615e-07	4.198531411183848e-07
cAMP signaling pathway: GLI1	-1.220931100390412e-06	1.5726064061174243e-06	1.6331925566444046e-06	-2.0865888125609867e-06	-7.845286617273736e-07	4.250386451079724e-07	-4.571865835834483e-06	-5.593448101938682e-06	-3.525212555832095e-07	-9.41272100859156e-07	9.941088880489394e-07	2.4398141798178707e-06	-2.398830950009869e-06	-4.546894803688283e-06	5.97214907922988e-06	-1.9677005093171658e-07	-5.60727737702755e-07	-3.199604872483313e-07	1.0695947943807043e-06	2.036781423499886e-06	2.139382894123964e-06	-8.58385418072367e-07	2.238744494430964e-06	3.178203253893141e-06	2.7725246267719425e-06	-9.321950399258773e-08	-7.048353325267819e-07	-1.614846051338786e-06	-2.0082895714900635e-06	2.0983426616622984e-06	1.6813016669992062e-06	-2.576006051411644e-06	-6.007208129739688e-06	-1.732339679681878e-07	-4.15451414100356e-07	-1.4383699926562771e-05	-1.0517900423867892e-06	8.819472969405157e-06	4.702189637492481e-05	5.72730049254516e-06	-4.405422383912721e-06	8.586547877469922e-07	1.5383209774557496e-06	4.081747706791799e-06	-2.64765415384575e-07	1.0708578849045235e-06	-9.775022717038853e-08	3.715790042206956e-06	9.613320380272215e-07
cAMP signaling pathway: PTCH1	1.87017295315786e-06	1.8509244763478248e-06	2.8686273278287206e-06	-2.5351479949237897e-06	-1.1956051451008702e-06	6.542643941237988e-07	1.1398840505337543e-05	6.465397697752203e-06	-5.61171190838905e-07	-1.499090196780914e-06	1.1543098156934068e-06	2.358221889515695e-06	-1.9832864076069746e-06	-5.7443175364572575e-06	1.9394379535584453e-05	-9.420514669759846e-07	8.261876241682357e-07	-3.073641410639099e-07	-7.765549385158175e-07	2.693605465767544e-06	1.6671119172625256e-06	-8.998884147586965e-07	2.634699570534538e-06	5.23225476351892e-06	4.085248555274206e-06	8.74580714835884e-08	-7.40475453947175e-07	1.4378306575665909e-06	-2.915131345399065e-06	2.570015047077055e-06	-1.0930172766398042e-06	-2.8087991474642644e-06	-1.016311346332544e-05	-2.260467561005721e-07	-2.148773499825939e-07	-1.4420349500182395e-05	-1.3896111849722794e-06	1.3928126871778004e-05	4.915357523418571e-05	4.833922973882773e-06	-2.482059539552565e-06	1.440279516448979e-06	1.8136529519905728e-06	7.219477323064839e-06	-3.401903603643387e-07	1.610342304312358e-06	-2.912092351331505e-07	5.384431850396442e-06	1.234087706459268e-06
cAMP signaling pathway: HHIP	2.5326512693178792e-06	1.1506717537640165e-06	1.1529480259587232e-06	-1.2429338472536517e-06	-8.879483210082062e-07	5.734103427823036e-07	-1.89765803614143e-05	-1.4387996172904774e-05	-8.847045374309895e-07	-7.511517193226178e-07	-1.6023814747848885e-06	2.9929912404088704e-06	4.205348247774085e-06	2.598543548533115e-06	-1.02279727013082e-05	-1.23676472813644e-06	8.917772600283281e-07	-2.407732784194752e-07	-8.927922982050179e-07	1.9030825428703573e-06	1.7388752589209777e-06	-1.0420268429979252e-06	2.359186831332457e-06	5.006986043701535e-06	-4.096948382169387e-06	3.2826661238666986e-07	-7.442854713199514e-07	6.173480533029378e-06	-1.3772188456977914e-06	1.5313048213258177e-06	2.440417863669799e-06	-1.098941317695774e-06	-8.894645160600145e-06	8.77018007138773e-07	-1.4257536747350118e-07	-1.9617440075785477e-05	9.102896383083812e-07	5.771046364033138e-06	1.6358072781911074e-05	-5.303614973957882e-06	-1.3997948963441298e-06	2.1593902361499182e-06	1.2338319601876818e-06	4.604848099614451e-06	-1.5545765321662526e-07	1.0014532691204136e-06	-1.2901738884810797e-07	2.214871829725384e-06	8.814471908273592e-07
cAMP signaling pathway: ACOX1	2.6960244115517385e-06	6.166040196862626e-07	-1.8644610555549385e-06	2.755194904125563e-06	5.573240025261854e-07	-1.2239305915165098e-06	-1.2637712580896864e-05	3.7299369868188295e-06	-1.3191690493140394e-06	2.9429052169815487e-06	1.0221618211931314e-06	1.8322810413861024e-06	2.4862230733333182e-06	3.830379369942203e-06	-8.497697486369519e-06	5.898538696287232e-07	-5.147309948846421e-07	1.829307783920586e-07	1.0607405207573473e-06	1.1737320974537832e-06	-7.065047954747658e-07	6.167653298199421e-07	-1.5100181654126127e-06	3.3363440605613096e-06	-2.5707609300081327e-06	2.4587015132653256e-07	5.406642355684393e-07	1.23394151294422e-06	4.901275203015655e-06	1.570855186502282e-06	1.1010550617672133e-06	1.7700839770950028e-06	-6.500114627526294e-06	-1.764745179060779e-07	-3.309686138900416e-07	9.267781220335334e-06	-1.0575139725872131e-06	-1.2134609150666414e-05	-2.724699684432077e-05	-4.370438353496592e-06	-1.1875044280529908e-06	-1.4153745839083624e-06	-1.3720894325811137e-06	-3.413287611322145e-06	4.950810186731089e-07	8.531262846868657e-07	2.0420411868821162e-07	2.2985451673022986e-06	-1.5603176476575708e-06
cAMP signaling pathway: F2R	-3.860449981427693e-06	1.42936383102546e-06	2.234957576756592e-06	-3.808576854690969e-06	6.616337617093258e-07	1.14740030393955e-06	9.017616486634584e-06	1.624774360099619e-05	1.6444178123862266e-06	-1.4143447164752776e-06	1.2642334027822175e-06	3.6484712348761462e-06	-5.772643210039587e-06	-2.2906947491059145e-06	7.649646424562491e-06	3.473160709852658e-07	6.349825585408384e-07	2.3413477539136763e-07	1.362920364283123e-06	8.9860293495948e-07	7.968595484614222e-07	-1.069022654445462e-06	5.620985023803628e-06	-7.075200779935386e-06	5.818744156731748e-06	-8.04090017038853e-07	-3.804977518348237e-07	-3.477673426509762e-06	-2.488127689086916e-06	1.410228526522031e-06	1.2830127968984886e-06	-7.278470131753612e-06	1.3581218406019437e-05	3.846434241637022e-07	-4.536120229776584e-07	4.187550811734341e-06	-1.4779155451856593e-06	1.546971293271434e-05	5.683748573776959e-05	1.012565998329167e-05	-3.7899071587998137e-06	2.86303324908716e-06	3.227333817267214e-06	7.261562317284914e-06	-2.179787380497769e-07	1.2905231344039212e-06	-2.389383832848447e-07	2.103828654591854e-06	1.6935996774635017e-06
cAMP signaling pathway: AMH	1.0722277318717198e-05	-5.119871952783285e-06	7.66889210194548e-06	6.52650513474597e-06	5.546161074379731e-06	-5.167752631957919e-06	-2.6685318091495207e-05	4.255953010454119e-05	-4.88240113033161e-06	-1.4752796892688502e-06	-1.065738333882469e-05	-1.4974830424865456e-05	1.6738086388156724e-05	5.383357777751752e-05	1.706432469873085e-05	-2.065589193265714e-06	-6.034322951355939e-06	-1.866231851812069e-06	-5.329932897502959e-06	-7.31038207333667e-06	7.323470456213881e-06	7.723913111908653e-06	2.219150153398916e-05	3.064460686958604e-05	-1.5911845903696865e-05	2.2765412477187277e-06	3.803096403419021e-06	-2.555069376674664e-05	-3.847503060376445e-06	-7.766425139945681e-06	-8.10319277518494e-06	3.739502301563758e-05	-8.563663694166055e-06	1.3735953558158349e-06	4.378476236774712e-06	-2.5365961906691196e-05	-8.95279456792646e-06	-6.154404600963277e-05	-0.0001389482569832	-3.163175603132442e-05	-1.03414791787274e-05	-1.4728892948724091e-05	-1.60664166801397e-05	-5.06746210944202e-05	-5.319516102458078e-07	-1.4453234812525232e-05	1.1981652783082286e-06	1.4893104488213484e-05	-7.6427327473601e-06
cAMP signaling pathway: ORAI1	4.0717100572335285e-06	8.200142469113615e-07	-4.0726786921187415e-06	4.866712724394012e-06	1.8030039304610657e-06	-2.533383847857852e-06	-2.3120262954752647e-05	1.105874240090057e-05	-2.282205648497654e-06	3.95706443224268e-06	1.435183260992428e-06	3.89406491607319e-06	5.326716807864322e-06	8.799858723117906e-06	-1.618011436996144e-05	9.743759802251857e-07	-1.3800421470513031e-06	-4.972279983618369e-07	1.468949177217612e-06	2.0083616200593827e-06	-1.721092053723688e-06	1.242359674388837e-06	-5.28150028087909e-06	7.963830960578578e-06	-4.558553346895234e-06	4.637692633350674e-07	1.412441798600675e-06	-2.932605497729791e-06	6.264156565026536e-06	2.080197836378855e-06	2.70471358265841e-06	7.338117508532556e-06	4.945061652318085e-06	5.119125085429191e-07	-8.659530745074335e-07	9.378021928649916e-06	-2.770478192419287e-06	-3.822249429917427e-05	-4.829889717402362e-05	-8.235112369211117e-06	-4.931467325440207e-06	-2.721983796122587e-06	-3.774812826021971e-06	-2.2122004895517147e-05	7.356429712418044e-07	-1.829468041369242e-06	6.302178177519359e-07	4.374221358022975e-06	-2.176673462589543e-06
cAMP signaling pathway: BAD	-4.048746490277464e-06	-9.762579183723312e-07	3.6954675794327113e-06	-3.396023378228489e-06	-1.1922214911017822e-06	2.4684071630838543e-06	3.174855797771027e-05	8.903817998262492e-06	1.952487583879923e-06	-4.2944785474736e-06	-1.5903789373450677e-06	-4.513020132971047e-06	-3.4297301568840903e-06	-1.062845253157862e-05	3.1787441003406684e-05	-1.1558996122011554e-06	1.935720731170062e-06	-4.886757850102331e-07	-1.4072560567375869e-06	-2.128488097577368e-06	-2.381476914116993e-06	-1.5693436680753882e-06	3.7924115609406194e-06	-3.816521477883134e-06	6.7802980097269855e-06	-3.862959070446103e-07	-2.2043225361699917e-06	5.768654847448157e-06	-6.558765382374607e-06	3.800920886793162e-06	-3.33111992036891e-06	-8.020381197221534e-06	-7.089775017765833e-06	-5.396897797450913e-07	4.278601985613484e-07	3.705869013808141e-06	3.000181310615454e-06	4.482167374224099e-05	6.058563342730848e-05	1.0148230517494734e-05	3.255233996995978e-06	5.305501760081815e-06	4.751312788536393e-06	2.2871294346486477e-05	-7.455203170061922e-07	-2.172375936475379e-06	-6.522608229243006e-07	-3.6010440000898514e-06	3.2977458179516647e-06
cAMP signaling pathway: NFKBIA NFKB1	4.965812393330359e-06	1.1418194859944591e-06	-4.249050956305628e-06	5.126935774592109e-06	1.963140924177333e-06	-3.584652356178545e-06	-3.859187229144748e-05	2.415053855179928e-05	-3.305802465693215e-06	5.222045491497293e-06	1.8316887359913088e-06	4.074468443881599e-06	5.374560718975285e-06	1.2619767451831324e-05	-3.357686149157007e-05	2.112312550466649e-06	-2.223444573272253e-06	-5.88416074928534e-07	2.2219994000426684e-06	2.806155218780549e-06	2.174967976798604e-06	1.616308084492467e-06	3.409187139880378e-06	4.904446502754177e-06	-7.124582042842024e-06	4.799475084969671e-07	1.6917985045517042e-06	-3.451769458573693e-06	8.233423863391604e-06	3.0922919558882718e-06	3.967305037550326e-06	7.704572291822487e-06	1.0199917460870286e-05	5.173802484605504e-07	-1.162838742154173e-06	1.936693307109952e-05	-2.6859315618129844e-06	-3.993703491455393e-05	-5.849570916282158e-05	-1.0512969855058469e-05	-4.409631684747622e-06	-4.543864960352969e-06	-4.462726369621941e-06	-2.1655526218607675e-05	9.35979465948278e-07	1.959412619221346e-06	6.875000280818967e-07	5.502335259376713e-06	-3.442188486917252e-06
cAMP signaling pathway: PLN	-7.037808223632375e-06	9.830935637689577e-07	-2.468641398706444e-06	1.8031444726792195e-06	2.400231628273331e-06	-2.732970449413437e-06	-5.31894042992934e-05	8.758238496065685e-05	-1.873626556728588e-06	1.1869541229144788e-06	3.747987035348324e-06	1.0411754417970109e-05	5.630819635596532e-06	8.300362858955863e-06	-4.448714343494558e-05	4.794608289838784e-06	-1.307166693251354e-06	3.4513164593197485e-07	1.3909649291990145e-06	2.372481156399013e-06	-2.4243426859233315e-06	2.419700192475282e-06	4.983422471756256e-06	5.420737882419223e-06	-4.9230899675600345e-06	1.0290849658239812e-06	2.34638964438369e-06	-4.108668865854266e-06	2.00695770187717e-06	1.800656384222865e-06	5.345612030069747e-06	4.46784833263602e-06	3.499719818426316e-05	4.548126799902437e-07	-2.1764880170994403e-06	7.85218622026998e-05	-2.254379203881404e-06	-2.58405545952687e-05	-2.900926162569161e-05	-9.792943063545428e-06	-3.2236448967334583e-06	1.651286129456119e-06	-3.2233290251135027e-06	-1.573941241921719e-05	2.5762467541574136e-07	2.1200524460154803e-06	4.862411589693595e-07	8.148159811362449e-06	2.140045803772733e-06
cAMP signaling pathway: RYR2	3.89430458738017e-06	-2.2287353133861285e-06	-4.173639218237758e-06	2.227731367868726e-06	2.619841071819978e-06	-3.4533618818463417e-06	-5.377305296451473e-05	6.048601091941439e-05	-2.758654534903815e-06	1.617082401012086e-06	2.772616769649919e-06	4.2787675086043325e-06	1.1541911453948049e-05	2.40009055412392e-05	-4.4834385365113374e-05	4.005585364694533e-06	-2.2678060299815124e-06	6.864533720055069e-07	2.0386444105278e-06	2.9172524713187047e-06	3.260271187129681e-06	2.349694740855626e-06	5.524639085321143e-06	1.2684583032562192e-05	-7.735378029672491e-06	1.284218644804103e-06	1.7735839008806154e-06	-3.957024410184639e-06	2.306422355787001e-06	-3.637506230079754e-06	4.131795298847887e-06	1.0428148397424324e-05	1.956790563436757e-05	6.950013549385092e-07	-7.731186236322422e-07	7.281456929559702e-05	-2.7025198097128093e-06	-3.3623501704550185e-05	-4.334092831828302e-05	-1.6234058425780043e-05	2.9166569883720086e-06	-6.5665789673526295e-06	-7.064682958140058e-06	-2.087471079166124e-05	2.988514439265105e-07	6.357738214013743e-06	4.679557859397119e-07	5.171702523380824e-06	-2.2148024875085723e-06
cAMP signaling pathway: GRIN3A	4.863143836542488e-06	-1.5055249210173778e-06	-4.053135786107303e-06	2.616595550183155e-06	1.4558842739190694e-06	-2.9035234429133128e-06	-2.628742343200414e-05	-1.089934701471902e-05	-2.372644823398654e-06	1.9454672188195863e-06	1.3595980321602848e-06	-7.026004642888025e-06	1.9142583691147577e-05	1.7601174767181714e-05	-1.975042614300616e-05	9.68809887333434e-07	-2.573408233707222e-06	5.599613153428559e-07	2.6371249989775497e-06	2.7881493734796564e-06	2.9157004251836885e-06	-1.905256652512714e-06	-5.696378616772496e-06	1.1597203250564282e-05	-6.903143186685946e-06	1.180693775612855e-06	1.245212997039906e-06	1.1713776153728086e-05	3.18256809244014e-06	-2.9490912760611e-06	2.546160956783376e-06	1.0156410231879917e-05	-1.2222284583768417e-05	-6.219680021679914e-07	-1.0392684536943304e-06	1.2594262586101124e-05	-2.127190349794583e-06	-3.628304660243779e-05	-4.610308364165634e-05	-1.934808913613511e-05	-2.8460103839395514e-06	-7.213115680048183e-06	-7.355364974408782e-06	-2.2873318578844904e-05	3.8689253664191305e-07	3.6800209394654736e-06	5.483108839691952e-07	2.5745140988866976e-06	-2.8528861573923955e-06
cAMP signaling pathway: GRIA1	4.006838278456948e-06	-1.600121908107942e-06	-2.755964842788493e-06	2.93496824376784e-06	-1.4120268565832898e-06	-2.606957727495303e-06	-3.568562548302651e-05	2.1266858981399196e-05	-2.8451421305828373e-06	2.514286586681305e-06	1.6772064568277212e-06	-7.027997346475456e-06	1.4187326057114664e-05	1.104266889912438e-05	-2.568401062813588e-05	1.02076828484548e-06	-2.797953905437917e-06	7.621221302379206e-07	3.609668553644376e-06	2.2035665135276663e-06	2.715275585405057e-06	-2.124570440200514e-06	6.467231727451771e-06	-9.360679111924553e-06	-7.638379586783374e-06	1.1280126377414029e-06	2.271488020606032e-06	6.943137495066328e-06	4.002490784164711e-06	-3.0376565040573466e-06	3.3421255877448028e-06	7.807399734396384e-06	-7.207544952281775e-06	4.777209178179095e-07	-5.078820552825097e-07	1.0009906827299013e-05	-1.6727063784546142e-06	-2.6812105346543036e-05	-5.253853312342487e-05	-1.799153018966868e-05	-5.16117963508381e-06	-6.130988808373393e-06	-5.317754441615629e-06	-1.465606945169126e-05	4.226633409045135e-07	3.4204376410379708e-06	3.540941199231054e-07	3.780036944322137e-06	-2.322545481096458e-06
cAMP signaling pathway: CFTR	7.637811950586674e-06	-1.496961382290462e-06	-3.276197335930738e-06	2.437252321983296e-06	5.428219574270228e-07	-2.160192925593621e-06	1.8396596186856527e-05	-3.7302050399136975e-05	-2.310440050231901e-06	3.3914551963130915e-06	1.2052577739733564e-06	6.976315056776491e-06	1.090331147574344e-05	8.221694462045903e-06	1.053232310543438e-05	7.389027610425857e-07	6.471515456701422e-07	3.435236110882012e-07	-2.57400668385234e-06	1.4366781698369914e-06	-1.5060509133692712e-06	1.7939061625235343e-06	4.06333701606077e-06	7.699164488630492e-06	-9.64428340342508e-06	4.727867509902106e-07	1.1939721836518657e-06	4.934030323372831e-06	6.078310221809197e-06	-2.5685876018822544e-06	-1.2961350634299463e-06	4.195516869617712e-06	1.3046219164988714e-05	1.521796457995509e-06	2.2194907550419164e-06	-1.712856948162359e-05	4.633252810366681e-06	-3.258196932470485e-05	-7.932318640923191e-05	-1.0765069341881373e-05	3.0740236371652945e-06	1.3630920020579126e-06	-4.628642147655729e-06	-1.903565144891665e-05	5.374446553804744e-07	1.6735469085459147e-06	5.342884109918506e-07	3.5198672824618266e-06	-2.1786084570961262e-06
cAMP signaling pathway: SLC9A1	3.1658050738820475e-06	-1.1148394653276298e-06	-4.798831470406668e-06	3.8182039882598585e-06	1.5157800466553775e-06	-3.2477805312008568e-06	-3.2760699301084485e-05	1.6758400579013148e-05	-2.845583992171585e-06	3.195222900769648e-06	1.4392547189119764e-06	4.659435008059708e-06	5.752737118137435e-06	1.587376472759923e-05	-2.6575825677405705e-05	1.4787523314032344e-06	-2.172527948845654e-06	-5.473764916136079e-07	2.368977525389712e-06	2.5786147580129703e-06	2.561955968133001e-06	1.5234516893683557e-06	4.078155030619389e-06	6.3481618186599605e-06	-8.294888648789761e-06	6.19062692599754e-07	1.3229233045902434e-06	-3.309931133679122e-06	4.9275717705942935e-06	-2.737197681616317e-06	3.2382241670211604e-06	8.446294148728034e-06	7.086382353147533e-06	5.174444898402781e-07	-1.0932190632393408e-06	2.09818719522344e-05	-3.1364784337283555e-06	-3.81740215609091e-05	-5.58172638557866e-05	-1.229156174616546e-05	-3.865535268023791e-06	-5.173048962050225e-06	-4.981793018735569e-06	-2.4485734331730264e-05	6.272239952543502e-07	2.490050086820258e-06	7.026450506807937e-07	3.598633435902212e-06	-2.642829607116944e-06
cAMP signaling pathway: ATP2B1	5.08620507863612e-06	1.2761463250241957e-06	-4.6280570199701405e-06	5.36014634004808e-06	1.937501717449296e-06	-3.647476570610937e-06	-4.244159479035876e-05	3.854011384952736e-05	-3.493002805630501e-06	5.456515281357639e-06	1.9793704683951697e-06	4.099490279946935e-06	1.051240363041786e-05	1.892662212776577e-05	-3.184177565262199e-05	1.7462309114031696e-06	-2.6395700945564247e-06	-6.264917973047402e-07	3.3036724401276235e-06	3.6212714262396937e-06	2.943124807258764e-06	1.9011985117922728e-06	5.13815834140806e-06	8.613541436757308e-06	-6.905719165796676e-06	1.012873972039219e-06	1.5584803367613924e-06	-4.256765388449392e-06	8.519401640629027e-06	3.5712457070988484e-06	4.488240491490921e-06	1.0082140880144743e-05	1.2335146196926774e-05	6.081618002788011e-07	-1.3074587436208245e-06	2.815808043077592e-05	-2.9662965518986555e-06	-4.714655303532321e-05	-5.787517618954898e-05	-1.3198151446010488e-05	-5.616343317975814e-06	-6.326524897902709e-06	-6.36659642503674e-06	-2.552950875838877e-05	9.856879571009555e-07	2.817346267418315e-06	7.216090384855854e-07	6.407428378703394e-06	-4.0187036123313975e-06
cAMP signaling pathway: CACNA1C	3.755790656784814e-06	-1.2517917556582074e-06	-3.514563445122029e-06	2.736353348773705e-06	2.006012315781798e-06	-2.9496335932673383e-06	-3.947642831430739e-05	3.8556271888446864e-05	-2.424357970214514e-06	3.1904498455173223e-06	1.9039167952100525e-06	3.907505315434249e-06	6.427888064970412e-06	1.3364837368345656e-05	-3.697765822904138e-05	2.0711554550671147e-06	-2.304022668855243e-06	5.337425025368822e-07	2.5479288214211304e-06	2.5130457811066773e-06	3.4199326669563114e-06	1.6620143460310034e-06	4.691038556154168e-06	6.605728024869754e-06	-8.102612723897266e-06	7.82279811577348e-07	2.0379928972601625e-06	-4.165554230426003e-06	5.027741127575725e-06	2.6402174901059264e-06	3.953902116446774e-06	9.797754560998324e-06	8.805177711775191e-06	6.666581229956831e-07	-1.1724411071179912e-06	3.513798065019136e-05	-3.191643007814247e-06	-3.79386551584929e-05	-5.395471174066032e-05	-1.3456252752627174e-05	-3.5211582528224847e-06	-5.358514278254887e-06	-5.33804619522979e-06	-2.2651469091758103e-05	5.979370903856636e-07	2.297079269954109e-06	6.580443243303773e-07	5.97540174140351e-06	-2.530700313055652e-06
cAMP signaling pathway: PDE3A	2.1846637604679817e-06	4.845135386172552e-07	-2.354733062701622e-06	2.1924981992143443e-06	7.307047653801417e-07	-1.5964661109713278e-06	-2.064001510405585e-05	1.0300754053616368e-05	-1.4780853401338535e-06	2.2107637836275626e-06	9.34078165509134e-07	2.602660755034066e-06	3.5414315342313987e-06	5.612823275259544e-06	-1.9801576111804508e-05	8.594262317718829e-07	-8.654357053664056e-07	-2.353922109203141e-07	6.27366766896757e-07	1.0378126466781248e-06	9.865984795775618e-07	6.329036527548918e-07	2.2535263309868007e-06	2.6460757956929207e-06	-3.999807275435725e-06	2.4891929353420813e-07	6.718646754277695e-07	-1.9798065171392377e-06	3.542084628001905e-06	1.4420866372828758e-06	2.0240804016088017e-06	4.873541677349722e-06	3.711709362297946e-06	3.2200454125697906e-07	-3.725556871148097e-07	9.41416879110547e-06	-1.498753462195241e-06	-2.424513925666049e-05	-3.210240422358606e-05	-6.178715711426618e-06	-1.8169158335277592e-06	-1.676081638324586e-06	-2.155277665510719e-06	-1.4552614516069287e-05	4.0308217211405253e-07	9.234371490294432e-07	4.445727838987024e-07	2.510028847206293e-06	-1.390945289880325e-06
cAMP signaling pathway: LIPE	3.807144842770958e-06	1.559283709928383e-06	-4.729088342031412e-06	2.0824858692565348e-06	1.370476679842684e-06	-3.322365142861804e-06	-4.566920756480879e-05	-4.50940840127151e-05	-2.6751586665967983e-06	1.5123187991363194e-06	3.109274917204981e-06	4.078508635759086e-06	1.365394304904294e-05	7.654068709146196e-06	-3.757174319954865e-05	9.001435335739864e-07	-1.1351458897200969e-06	4.944300830857558e-07	-1.8394913879979716e-06	2.041625757445402e-06	2.941559001599705e-06	2.8663215138141926e-06	-8.762416789419189e-06	1.5746338552523145e-05	-4.765908179772148e-06	2.0816559203954362e-07	1.449423819445162e-06	6.709209021253135e-06	2.217226195634852e-06	-3.0120208705724035e-06	4.257628924662015e-06	1.3783833090243592e-05	-1.879784216769177e-05	-1.4074051762809524e-06	-1.1954166055170338e-06	-1.545316315749474e-05	-3.133603860520301e-06	-4.8526347192505054e-05	-5.975178103929979e-05	-1.1179985106967612e-05	-3.895421164074911e-06	-4.562305631036676e-06	-5.31274365322791e-06	-3.420543002500017e-05	3.335292385155877e-07	2.156118245045175e-06	8.234281025597142e-07	3.0807467440032667e-06	-1.3527155594620366e-06
cAMP signaling pathway: TNNI3	2.30068690986622e-06	-1.00781255355634e-06	-8.971094394415586e-06	2.486098737619772e-06	1.226380236454393e-06	-2.0761099456207416e-06	-2.8161796574875028e-05	-4.222408862900145e-05	-1.2352203521442986e-06	8.128045032348144e-07	-2.6779390405802205e-06	4.5047041306406345e-06	7.469297434594621e-06	9.793588655129316e-06	-1.0525651332113378e-05	7.472942570485291e-07	-1.451205729837932e-06	-3.739206317041185e-07	-2.0310609121186e-06	1.5920374089267624e-06	-2.987800598945655e-06	1.3571565601460023e-06	-8.912235216109284e-06	1.897866582409857e-05	-2.759186505313084e-06	-6.719172483206429e-07	1.9511893000986444e-06	-2.906405388993789e-06	1.2171913124869777e-06	1.5072140331647904e-06	5.0702748371065056e-06	6.087137347873239e-06	-1.3164262191981693e-05	7.445727690215981e-07	-1.5004251512584708e-06	6.0226477738426966e-05	-2.6982763094011307e-06	-3.653701683871116e-05	-4.3846751908872974e-05	-8.639519549561808e-06	-3.4572058347308157e-06	-6.498977351430616e-06	-5.56417164209667e-06	-2.167332126750564e-05	2.748955856210265e-07	3.3188827242749584e-06	5.575669384721821e-07	3.3436195538452395e-06	-8.800928176236853e-07
cAMP signaling pathway: ATP1B4 FXYD1	6.098425959312255e-06	1.3754646014211922e-06	-3.115038619390907e-06	5.274894845324746e-06	2.503007105417031e-06	-3.4239621761162245e-06	-4.910823455897004e-05	3.5726780473102626e-05	-3.2200436736019923e-06	5.694723479026044e-06	2.794796000715272e-06	4.33427716264435e-06	1.3706212425118867e-05	1.4611069296481167e-05	-3.595770530796823e-05	3.356684865106174e-06	-2.3238078206884803e-06	5.539153111231466e-07	2.886397057028771e-06	2.775900016070694e-06	2.281292640060076e-06	1.713432756710189e-06	4.161219060284396e-06	7.829155213647042e-06	-5.229799353430968e-06	6.472774577601531e-07	1.2358484164030824e-06	5.614659011648455e-06	8.790319906011226e-06	3.188046716678776e-06	4.934295119226027e-06	5.133487872527913e-06	2.761281914682356e-05	-4.394598930867701e-07	-1.7451498082471702e-06	3.727365187406935e-05	-2.3355156529934307e-06	-2.72985679193569e-05	-3.128664778908387e-05	-1.1531317265524448e-05	-4.52033427302233e-06	-4.196565404146168e-06	-5.131553303773874e-06	-1.1303927813397016e-05	9.643098997933398e-07	2.6709291434376163e-06	5.151839384615775e-07	1.0132105360376537e-05	-3.196076630020909e-06
cAMP signaling pathway: AKT3	7.317587223812135e-07	1.8654375414999385e-07	-4.933259616887561e-07	7.438330018155901e-07	-7.363812908613917e-07	-6.236419091372198e-07	-7.577065905081602e-06	2.950839999984639e-06	-5.856799016445772e-07	6.157166944338844e-07	4.930957960625623e-07	5.690503790123851e-07	1.3282873123073836e-06	1.6689681770030124e-06	-6.39754603450804e-06	4.479810676473949e-07	-3.4079453012570296e-07	1.3817057058235008e-07	6.71984038474324e-07	4.784621854733783e-07	4.963448646745863e-07	3.791266286980202e-07	9.534093526949624e-07	1.7157735978884215e-06	-8.578915365665763e-07	1.3544075268616278e-07	2.503557727053767e-07	8.763658316675312e-07	9.621930265941635e-07	3.917368339457182e-07	8.403884367392397e-07	1.1606081459742206e-06	2.843488001906973e-06	-7.432083447736809e-08	-2.697568488328799e-07	1.3070866102896023e-06	-3.095978934073097e-07	-3.411474892342544e-06	-4.61026926306249e-06	-1.6009599841084316e-06	-5.242413442448788e-07	-6.013280064808949e-07	-8.519104518718359e-07	-1.4264008822234475e-06	1.1451736635726167e-07	3.957992173239859e-07	4.9638253993658435e-08	9.265855701184224e-07	-4.489275672926241e-07
cAMP signaling pathway: RHOA*	-6.573444276965566e-07	1.718498028446705e-07	5.315413886320068e-07	-5.733243276352557e-07	-6.145871126985237e-07	7.009427812776115e-07	8.11460011028061e-06	4.713591146163633e-06	6.056894485725795e-07	-4.771024863235448e-07	-4.3387311060956267e-07	-5.948295159499286e-07	-8.849803062470454e-07	-1.9623158187331386e-06	7.155561613560068e-06	-4.30664958712624e-07	4.501277477161631e-07	-1.347682677475878e-07	-4.357919553822566e-07	-5.156301272369875e-07	-6.583803169757835e-07	-3.763402768375534e-07	1.9148534562653862e-06	-2.9883055091284066e-06	1.2845711783778678e-06	-1.492117459152407e-07	-2.391449001644372e-07	3.919868601201628e-07	-7.512609862662624e-07	-4.192235803341277e-07	-8.62856314734112e-07	-1.5965978976346513e-06	-2.7132763156983936e-06	-3.76600054680283e-08	2.426183878476198e-07	1.3179688221987231e-06	3.520649931371466e-07	3.1147022766219024e-06	4.841087128018578e-06	2.113485190106248e-06	7.501847954147247e-07	8.747243524269375e-07	9.002530289873652e-07	1.433219835909298e-06	-9.844125552568605e-08	-4.827861201466414e-07	-5.078953845601486e-08	-1.2693999553720404e-06	4.691314681243143e-07
cAMP signaling pathway: Diacylglycerol	2.2850378186559164e-06	5.994813766605496e-07	-1.6209171560968476e-06	1.510736612484287e-06	-2.279872529630438e-06	-2.032809539705469e-06	-4.119531009472808e-05	2.4182904105620085e-05	-1.6556085236825372e-06	1.0779194268389769e-06	1.621294471227949e-06	3.67315063448435e-06	3.1130756605889976e-06	7.149031473009865e-06	-2.9940666528101217e-05	2.25829910884615e-06	-1.3024948204500295e-06	6.158676612689298e-07	1.809354538459766e-06	1.3974230574971862e-06	2.33984944809108e-06	1.5122057845317109e-06	3.656766507503863e-06	5.98148988227963e-06	-5.359910413228738e-06	7.049738094049103e-07	9.582397665111283e-07	1.941212120081045e-06	1.881372297910677e-06	9.025117003558906e-07	3.93786124732528e-06	4.650385193089476e-06	1.3923698321269166e-05	1.7180529002316557e-07	-9.809794345149992e-07	1.3713226880710158e-05	-1.005284134782606e-06	-1.0640428915037073e-05	-1.5875813472066004e-05	-7.397415168816866e-06	2.0396576012984884e-06	-1.139617156156606e-06	-2.411639590312623e-06	-6.104539468153347e-06	2.3123487836461026e-07	1.843805922137338e-06	2.0531325059469346e-07	5.0121976758409896e-06	-1.199194955015808e-06
cAMP signaling pathway: D-myo-Inositol 1,4,5-trisphosphate	2.2850378186559164e-06	5.994813766605496e-07	-1.6209171560968476e-06	1.510736612484287e-06	-2.279872529630438e-06	-2.032809539705469e-06	-4.119531009472808e-05	2.4182904105620085e-05	-1.6556085236825372e-06	1.0779194268389769e-06	1.621294471227949e-06	3.67315063448435e-06	3.1130756605889976e-06	7.149031473009865e-06	-2.9940666528101217e-05	2.25829910884615e-06	-1.3024948204500295e-06	6.158676612689298e-07	1.809354538459766e-06	1.3974230574971862e-06	2.33984944809108e-06	1.5122057845317109e-06	3.656766507503863e-06	5.98148988227963e-06	-5.359910413228738e-06	7.049738094049103e-07	9.582397665111283e-07	1.941212120081045e-06	1.881372297910677e-06	9.025117003558906e-07	3.93786124732528e-06	4.650385193089476e-06	1.3923698321269166e-05	1.7180529002316557e-07	-9.809794345149992e-07	1.3713226880710158e-05	-1.005284134782606e-06	-1.0640428915037073e-05	-1.5875813472066004e-05	-7.397415168816866e-06	2.0396576012984884e-06	-1.139617156156606e-06	-2.411639590312623e-06	-6.104539468153347e-06	2.3123487836461026e-07	1.843805922137338e-06	2.0531325059469346e-07	5.0121976758409896e-06	-1.199194955015808e-06
cAMP signaling pathway: PAK1	5.045380140936148e-07	-1.368256011993504e-07	-3.974954638854452e-07	5.016176357608405e-07	-4.053597228712335e-07	-3.992605487189403e-07	-8.733093864610143e-07	1.6714371598795906e-06	-3.487347369994048e-07	2.922359526204683e-07	2.2769830816397069e-07	-7.402626907793427e-07	1.2283580481284613e-06	-1.202336326700122e-06	-9.238470421790308e-07	1.926761785421351e-07	-2.522760313960787e-07	9.182711137807477e-08	5.496881889834326e-07	3.1504905533842346e-07	5.101315197575991e-07	2.1217285257728665e-07	-9.325765771569932e-07	1.3334121492323574e-06	-4.92885579232711e-07	1.430152115138766e-07	-2.187201341605161e-07	9.73227514155038e-07	4.93660302527461e-07	2.651160377959411e-07	-3.0781096366486824e-07	7.830263069091049e-07	1.0253495702501477e-06	-3.6182000195140985e-08	-1.2155907542548608e-07	-1.0687017088005775e-06	-1.1151935678210648e-07	-1.9821170439470266e-06	-2.6583059593516933e-06	-1.0567909600548312e-06	-3.495116080585672e-07	-4.898424609397186e-07	-6.596244666316754e-07	-9.925259645609691e-07	6.918750685815873e-08	3.237963772120281e-07	-2.2416370489269675e-08	-3.603133282616337e-07	-3.038433467500289e-07
cAMP signaling pathway: AFDN	1.800109492628227e-06	4.1069282246310473e-07	-1.050072010422552e-06	1.4718504310997956e-06	1.3925972549662249e-06	-1.3630334695007007e-06	-1.560430948125398e-05	-6.128407673531053e-06	-1.3985801118080866e-06	1.547304503868831e-06	9.385325020860212e-07	1.4861672320988483e-06	2.687112790807355e-06	3.800389148085941e-06	-1.3232653891754751e-05	1.0410297977750083e-06	-6.70614483684933e-07	3.3299961194360386e-07	1.072795961286567e-06	1.1223254013318628e-06	1.3245332132230628e-06	8.694734760500954e-07	-3.885318147872191e-06	5.154839361330874e-06	-2.2618237601727828e-06	2.7847288495496613e-07	6.017557491338474e-07	1.3779444096747937e-06	2.4430850959371617e-06	9.32828397842802e-07	1.7745299683150763e-06	3.512397421967608e-06	7.601826428517043e-06	1.2243441322167997e-07	-5.566296347518775e-07	2.445487027579315e-06	-6.315499870340512e-07	-1.0291272745456264e-05	-1.271694132741024e-05	-3.76610696648034e-06	1.165962379921876e-06	-1.476265633295558e-06	-1.887423892121243e-06	-4.418927537918663e-06	2.997221928816733e-07	1.0055776145045691e-06	1.317048457214123e-07	2.782101852402351e-06	-1.0781080023967656e-06
cAMP signaling pathway: Phosphatidate	1.4976984232903563e-06	3.5832838158629885e-07	-7.578326294704947e-07	1.1363773081207953e-06	1.0048711496776983e-06	-1.178642145065664e-06	-1.1536760310312194e-05	3.679974496148606e-06	-9.347812897373248e-07	1.0617175404895006e-06	8.752057986291286e-07	1.1507027758770885e-06	1.3405205888398906e-06	2.9511009078088343e-06	-1.0218893153523763e-05	9.34493232440644e-07	-5.920898147020204e-07	2.71917798658035e-07	9.255872405838046e-07	8.462429970232367e-07	1.1296654649914635e-06	7.377250612036931e-07	1.6218313477043138e-06	3.15624955371141e-06	-1.3415964944396056e-06	2.3492778426446095e-07	3.862164900517183e-07	1.1441189685872977e-06	1.6953162807940964e-06	6.986416507739316e-07	1.5443176771855788e-06	1.555771790247696e-06	6.986697043575196e-06	-1.0972140482551905e-07	-5.312745116099706e-07	1.8000149197145368e-06	-6.72532617889016e-07	-5.624865284820198e-06	-7.951110533696466e-06	-2.9712567600096618e-06	-1.2874899516720154e-06	-7.466191776654116e-07	-1.1147373365623928e-06	-2.9742655643156117e-06	2.018436538700997e-07	1.0563893689351895e-06	1.0506918259499776e-07	2.703972760197604e-06	-7.770222299954021e-07
cAMP signaling pathway: MAPK8	4.75644701700373e-06	-1.0345661681316206e-06	-2.953652289451553e-06	3.5015036407467408e-06	3.6345431612646426e-06	-3.5346201548193986e-06	-3.3870489990804264e-05	-1.5918647654827035e-05	-3.098350245375929e-06	3.1254709331531917e-06	2.1186948001280607e-06	4.333527373558598e-06	1.1742471801130916e-05	8.84402951624177e-06	-2.9529810933347164e-05	2.1526340319926555e-06	-2.3171323096230817e-06	7.609256552247327e-07	4.283226785249597e-06	2.7112581728334005e-06	4.0464961043874096e-06	1.9257652150495417e-06	6.563885444803893e-06	1.0695178999612689e-05	-6.572537640074258e-06	8.642954274009998e-07	-1.4366260201363345e-06	6.626588698470266e-06	5.189361503502027e-06	1.964733316009024e-06	3.6906994733248767e-06	8.627040002160315e-06	1.8016694285448145e-05	-4.84454074307111e-07	-1.0170991393673458e-06	-4.062712539926424e-06	-1.7923145639481818e-06	-2.9213595175495808e-05	-4.812416879245382e-05	-1.2435660415847863e-05	-3.15497565441738e-06	-4.414794844187176e-06	-6.429386364897025e-06	-1.5012662180962649e-05	5.921663641479708e-07	2.5520886398541278e-06	3.551770466279784e-07	5.3928204431970055e-06	-2.4856505901244904e-06
cAMP signaling pathway: HCN4	1.6826939194053554e-05	-5.114805177727559e-06	-1.48769764342554e-05	5.05239572651222e-06	-3.63831037357607e-06	-5.911398220888998e-06	-2.914162964861056e-05	-6.19122150973149e-05	-5.390486159633597e-06	2.6032260925868084e-06	-4.945680612911328e-06	-1.5711842822509608e-05	4.398462714506063e-05	3.416049182608688e-05	-1.145891247362659e-05	-2.13589369982983e-06	-3.6011550099890165e-06	-8.824264100094939e-07	-4.641857393723117e-06	4.363736028765871e-06	-4.544048446920296e-06	4.073585749279733e-06	-2.220040153147672e-05	3.785423945436739e-05	-1.6448557884211178e-05	2.521558078616012e-06	2.685314478650369e-06	1.551973154415996e-05	5.135909211013026e-06	-4.584426359658812e-06	5.151932174256089e-06	4.262053192360072e-05	-1.7410488279083725e-05	1.657784216835096e-06	-1.8578585866795533e-06	5.775180952316954e-05	-6.255467480354576e-06	-0.000127209030573	-0.0002089422696792	-4.362368753402348e-05	-7.102477173852484e-06	-1.4445198110645755e-05	-1.578820264741772e-05	-8.340541613508085e-05	7.456275403924208e-07	9.316981850357764e-06	1.3774404115607274e-06	-6.935940993335812e-06	-4.156321849397934e-06
Chemokine signaling pathway: MAPK1	1.0310932575099451e-06	2.2397128050280378e-07	-5.448918161833127e-07	1.936720039233753e-06	3.271540394457491e-07	3.862395292121498e-07	8.231803986375262e-06	-1.112067824873855e-05	-3.9953412999584274e-07	-5.970000130374693e-08	-5.012554640197811e-07	-1.4565760781755317e-06	-1.1590606696211307e-06	3.888572552881036e-06	4.853802262806595e-06	2.0374828581700426e-07	-4.046033703224122e-07	-3.9813250290747706e-07	-2.665189449163054e-07	2.5037966193570405e-07	-1.9712414343485304e-06	-6.604364170903674e-07	-2.347971643080879e-06	2.4874236290309105e-06	2.3558102815529125e-06	1.505104537337692e-07	-3.448989666781507e-07	1.8169948849430064e-06	-1.4409114137596158e-07	4.925249894086352e-07	-6.813390328784769e-07	-6.898082989055138e-07	1.9220255256111677e-05	4.311193475203773e-07	-1.3442233206738573e-07	-5.786196243232029e-06	3.6243285783441653e-07	1.3811490644989758e-06	4.7378800108622144e-06	1.7484166484191173e-06	1.0228340828175555e-06	6.612883160649421e-07	-5.142814334497855e-07	1.0470923331823045e-06	8.820338693488676e-08	5.005419054881788e-07	-8.490260313634736e-08	-4.359590306022783e-06	-2.670938349090846e-07
HIF-1 signaling pathway: HK1	-4.7498789493966645e-06	1.0895081419347778e-06	1.4077039600422498e-06	-1.5889903574916715e-06	9.152166008759865e-07	1.0201847406967516e-06	5.893064214399623e-06	5.1909940332693805e-05	7.483836921619421e-07	-1.266162546633468e-06	2.1613292977561974e-06	2.135617297017263e-06	-2.8443470828497955e-06	3.251825886225575e-06	8.542053425808013e-06	1.2437994743327434e-06	-1.3917500964424324e-06	-5.170354652582039e-07	2.5129331606026027e-06	1.251175237542463e-06	-1.8599762283726504e-06	-7.738952561068156e-07	6.881659715775776e-06	6.144199308259458e-06	6.025453794963129e-06	-1.5847866980024638e-07	-8.970369928872168e-07	-1.4619734957221195e-06	-2.2191641673686863e-06	1.161081520846928e-06	8.657996938516245e-07	-4.598570481206757e-06	1.0038048766132938e-05	3.906579147818907e-07	-1.4707637388284212e-06	3.147101603071981e-05	-1.2367331226798551e-06	7.413168339346698e-06	5.255670380594358e-05	5.298778756796333e-06	2.3368561074611367e-06	1.971054879699013e-06	1.7206790606565343e-06	2.6635758327666383e-06	-1.2876317429399208e-07	1.7943482726507889e-06	-1.1267701094649958e-07	-2.628794785086981e-06	1.119152337552986e-06
FoxO signaling pathway: CCNB3	-5.917402511461789e-18	1.1904104885921892e-18	-4.8254467243880064e-18	5.511143146397737e-18	-2.63715077020456e-18	2.1263039130975123e-18	4.9282366336519406e-17	1.7426282886522906e-17	2.614963714615347e-18	-6.648773104304602e-19	2.4271622291527725e-18	7.358459742995695e-18	-1.2366781092836217e-17	-6.8128908177514325e-18	5.0889111981610606e-17	-1.9399917907171606e-18	-1.5656101186340314e-18	-1.4900768400629082e-18	-2.135436065855575e-18	-2.6491621285668206e-18	-4.837531106773044e-18	-1.796172290331817e-18	-1.1399188823054198e-17	-1.7815060435558925e-17	8.30050559149045e-18	-4.1184252316842416e-19	-1.1178238222196108e-18	-1.0906487509703316e-17	-9.6311454185465e-19	1.9877880445658737e-18	-5.301768596585028e-18	-9.635889660407637e-18	-1.7319997066751928e-17	-5.518857304565218e-19	-8.865554967112076e-19	-3.124929294185391e-17	3.3153551645216797e-18	5.3971114542627516e-18	3.393686530739619e-17	1.5369559367237978e-17	-5.7443869223868415e-18	4.001725414048664e-18	4.783446798129117e-18	-8.037929476882648e-18	2.7777345312895447e-19	-4.452543150224408e-18	-4.222642103862533e-19	-1.5319798923631226e-17	1.5838196490006501e-18
FoxO signaling pathway: CCND1	-9.977218463387112e-18	2.243414758630369e-18	8.560518358672234e-18	7.2786938858897e-18	-3.2822193795709375e-18	2.1032578042645842e-18	2.5135885899206105e-17	6.765108446058675e-17	2.9736573879853978e-18	1.646769063971471e-18	5.5984531092542884e-18	1.1888510274014445e-17	-2.3842282361999084e-17	-1.0487831117089645e-17	2.999467126493688e-17	1.1168661630884468e-18	-2.53665291532874e-18	-2.3410745904303738e-18	3.657232283476783e-18	-2.133161599898775e-18	-7.517300948037389e-18	3.2741696526125193e-18	-1.638116274444244e-17	-2.4204888441548402e-17	1.2932861465375136e-17	7.223728283356854e-19	1.3122852219904929e-18	-2.1109227805077737e-17	1.0052562409301786e-18	3.035656172699411e-18	-3.978060171049031e-18	-1.3745256896884342e-17	-8.101210632547389e-18	-8.151631373987877e-19	-1.2769368777687997e-18	-2.7827779164670214e-17	2.0297359497682906e-18	2.989006880527527e-17	6.596474774812149e-17	2.337098751602589e-17	-6.389018592425893e-18	6.8793646832124146e-18	8.735224305230428e-18	1.061013879992319e-17	4.845821465683912e-19	-5.914562428579444e-18	-2.8904083176588533e-19	-1.1498066009973667e-17	2.1413912610092165e-18
FoxO signaling pathway: CCNG2	-8.325335467506881e-18	2.0570881568258446e-18	8.685152025273488e-18	8.415580079549454e-18	-3.2811313050727683e-18	1.6414988087098814e-18	4.1119868483223853e-17	5.857759309961593e-17	2.280655392544228e-18	6.815349455896122e-19	6.027637328886719e-18	1.1819577841872694e-17	-1.925335993681414e-17	-8.944153903451152e-18	3.1284407886453986e-17	1.8666110296528305e-18	-3.071242853638563e-18	-2.221571664062632e-18	3.891941448244028e-18	-1.747498143724434e-18	-8.182862504437104e-18	3.3508429240036384e-18	2.07853762017612e-17	-2.897441687649391e-17	1.3553223893757213e-17	-5.992044116068093e-19	1.258817855765856e-18	-1.566870881948872e-17	-1.264186250516746e-18	3.012973305246316e-18	-4.4499059685516084e-18	-1.58328368553056e-17	1.0459753035760168e-17	-9.936453048187957e-19	-1.3585265220870797e-18	-3.807436016597939e-17	-1.837041975079933e-18	2.4656188587088826e-17	7.341115803054878e-17	2.1766743551691038e-17	-7.218325282570477e-18	8.031815828110656e-18	6.727583246322111e-18	8.264705391504273e-18	3.54569554383401e-19	-4.4833422304134585e-18	-2.8069921996597403e-19	-1.4388036257411718e-17	1.9124571245630377e-18
FoxO signaling pathway: CDKN2B	-4.7236110980497414e-18	1.9929601548762854e-18	6.7445326573795095e-18	5.421932305854873e-18	-2.624947186929441e-18	-2.174716861099481e-18	6.346176784350257e-17	1.7586966473589746e-17	-2.8272439678036575e-18	-1.3089055730467605e-18	6.234096066532474e-18	9.299373820798895e-18	-1.6931954994527562e-17	-1.1272816159400409e-17	6.98341769945403e-17	1.0176002317623418e-18	-1.939161931255188e-18	-1.137579154361341e-18	2.3852594178065586e-18	2.929654583877358e-18	5.7476114599579296e-18	2.28986025762914e-18	7.990598953532979e-18	-1.1879905778171985e-17	1.6086062685006066e-17	-8.069655018144097e-19	1.2289049335636544e-18	-1.5889394881686e-17	-2.1763354370035107e-18	2.907913757337543e-18	-6.032764587762597e-18	-9.46396625919187e-18	1.2286211843415936e-17	2.366711463647752e-19	-1.2951452563726204e-18	-4.671529223738113e-17	3.226350686750678e-18	1.5955271339849756e-17	8.433000079229363e-17	2.5908438827890162e-17	5.246181913791463e-18	4.74888464349093e-18	4.987999696122825e-18	-3.2962715846208997e-18	2.403805948361612e-19	-2.2060117076421604e-18	2.6362909712164615e-19	-8.502280292829401e-18	1.439487284249592e-18
FoxO signaling pathway: CDKN2D	-7.170626402151465e-18	1.600913688054764e-18	-8.21577277764125e-18	1.0606860745257786e-17	2.5850721393665578e-18	1.8228477712379127e-18	2.0931661843323865e-17	7.278530411390356e-17	-2.9681062419812247e-18	7.838230095208547e-19	3.777422267589018e-18	7.245018810173135e-18	-1.5418678872989418e-17	5.2961707274039195e-18	2.3081854321505406e-17	1.859112391835572e-18	-3.703675746301255e-18	-2.9645948312938125e-18	-3.2777590150863e-18	-1.455211380134497e-18	-9.831897640190433e-18	2.9211526915864653e-18	-1.857413711221448e-17	-1.955434323487924e-17	1.495912751867537e-17	5.675673517911775e-19	1.1254955731421005e-18	-1.2665206515213329e-17	-6.414525825230172e-19	3.112255661092976e-18	-3.0227222384502717e-18	-1.1376845451461029e-17	2.6913268804258518e-17	-3.1734448141129456e-19	-1.1812121349626505e-18	-2.2888808788761204e-17	-1.7015525792621622e-18	1.2297639322786234e-17	4.797723302392009e-17	1.5912063261163738e-17	-4.586486716320871e-18	5.737850070348988e-18	4.723839770490141e-18	-8.318499173268865e-18	4.820641018991448e-19	-3.738245846215154e-18	-4.513055486722289e-19	-1.8191721974125825e-17	1.7243283749799745e-18
FoxO signaling pathway: CDKN1A	-1.1174623668641266e-17	2.4349928758697557e-18	9.27433295689594e-18	8.229654300710134e-18	-4.481369227318829e-18	2.38622524323962e-18	2.3367785368222065e-17	7.708280082563855e-17	2.910625570952346e-18	1.992860304845449e-18	7.175656458537434e-18	1.3132294858867522e-17	-2.7226075075675277e-17	-1.164455666658329e-17	3.2703917733196045e-17	1.5159666762971793e-18	-3.629037611781294e-18	-2.8136760999736973e-18	4.836246896302525e-18	-2.293835075159349e-18	-8.908827097988205e-18	3.5195143548707735e-18	2.3983733928119467e-17	-3.479588238342976e-17	1.6162492794530446e-17	-8.614503154583681e-19	1.609687231359584e-18	-2.3634648410204318e-17	1.5686289505269565e-18	3.490786376298381e-18	-4.102481562121998e-18	-1.7813442898603058e-17	-9.614306303803374e-18	-6.021029611068266e-19	-1.446612690253454e-18	-3.515365880941758e-17	2.9634393422735058e-18	2.7632244326629248e-17	7.823978316930947e-17	2.6508692990862295e-17	-7.730549571557115e-18	9.144305785986044e-18	8.91647542227977e-18	-9.588920497065978e-18	6.401055423566476e-19	-5.717907169190225e-18	-3.9572517119754432e-19	-1.2579512172807229e-17	2.0409871196736444e-18
FoxO signaling pathway: CDKN1B	-8.639017614945973e-18	1.9213091967525364e-18	9.140024493748507e-18	9.152644907715059e-18	-3.43264305743581e-18	1.760337047542909e-18	1.1604503487877409e-17	6.866868801285879e-17	2.135669076108684e-18	1.641271733207768e-18	5.216623069544478e-18	1.1877924117414263e-17	-2.0546064663506018e-17	-9.33602841786284e-18	1.6100885571614112e-17	2.7451764089019927e-18	-3.15419766038844e-18	-2.655350735090327e-18	-3.8925436781558055e-18	-1.8237554968922567e-18	-9.053385103190825e-18	3.734240826216913e-18	-1.978849120211155e-17	-2.942846369901527e-17	1.4368366222068705e-17	-8.086369180555945e-19	1.4038975135421945e-18	-1.7254811342775546e-17	1.403556764529131e-18	3.294208423493319e-18	-3.597932148466195e-18	-1.4936245986420266e-17	1.1755566200121384e-17	-9.570658075238149e-19	-1.4164413806636626e-18	-3.496606538174095e-17	-2.151604191473424e-18	2.2331717244560158e-17	5.613427376326674e-17	1.9498113561018306e-17	-7.263224532346668e-18	7.605022255042056e-18	7.131968200685409e-18	8.616977095960877e-18	5.01553346233995e-19	-5.1731692803606766e-18	-3.760680348559189e-19	-1.4686733446953257e-17	2.2976180282903232e-18
FoxO signaling pathway: RBL2	-8.737741669092426e-18	2.057400672568991e-18	8.964556731713508e-18	9.351599540522638e-18	-3.683923808173741e-18	1.935144093513601e-18	1.0963542532410605e-17	6.834588310544412e-17	2.0218682040011833e-18	1.7315552583659429e-18	5.954488643210819e-18	1.3961447302110906e-17	-2.2424376317833814e-17	-9.292574619807364e-18	1.3475155196116424e-17	1.7097560002525157e-18	-2.870038384402024e-18	-2.6718414169698872e-18	3.7799772005428546e-18	-1.7345330049670332e-18	-8.596204830627588e-18	3.581184867533045e-18	-1.887220817188629e-17	-2.7193694521942968e-17	1.222434289043618e-17	-8.188671544442862e-19	1.562598597270454e-18	-2.029478447417113e-17	1.3350585845748534e-18	2.8225790679936472e-18	-3.798770844380482e-18	-1.3410943567937867e-17	1.0186154028544728e-17	-7.992406362780653e-19	-1.1006437513301791e-18	-3.386588998820163e-17	2.780292061354593e-18	2.116618895552345e-17	5.2538257058687456e-17	1.9423507181441468e-17	-6.1176946702061425e-18	7.362891563646356e-18	7.41414175464058e-18	-7.123672810567345e-18	5.215181846933542e-19	-5.2366492903834196e-18	-3.6575484366331674e-19	-1.3546384878923736e-17	2.107965138513023e-18
FoxO signaling pathway: PLK4	-7.575075652747109e-18	1.6924599938283193e-18	7.519698898924248e-18	7.238495352768827e-18	-2.8501179061127853e-18	1.8712092869920693e-18	3.4046541733058254e-17	3.6077467833342086e-17	2.0183554948038862e-18	1.3500077211479085e-18	4.2071921766825184e-18	1.0399529205887936e-17	-2.0860870355388012e-17	-6.276692077893573e-18	3.269180670282994e-17	8.712282718501071e-19	-2.872501761291893e-18	-1.9757884017983256e-18	3.472235137801585e-18	-1.662690799092715e-18	-7.543235726159425e-18	2.642302793056253e-18	-1.6838606730343366e-17	-2.264422293390421e-17	1.5617085646001252e-17	-6.529118528930143e-19	1.094250979227302e-18	-1.702033177400818e-17	1.1179972745488548e-18	2.7296500220146253e-18	-3.827248721564881e-18	-1.4242571131109658e-17	1.5945474732075217e-17	-5.083500876296046e-19	-1.2147860265834785e-18	-4.13107545808619e-17	-1.686665863857982e-18	1.7700669179510225e-17	6.837813543005078e-17	2.123228539363045e-17	-5.117624545042823e-18	6.27174527527596e-18	5.641279727185914e-18	-6.870450150536658e-18	4.91014541676727e-19	-4.834033020847362e-18	-3.4813176699573863e-19	-1.2862057660282928e-17	1.6912903565792894e-18
FoxO signaling pathway: GADD45G	-1.130132529057772e-17	2.1778219637951137e-18	1.0160202476660674e-17	1.1114343008035625e-17	-3.939631401524069e-18	2.2852855801358887e-18	-1.2582294164585763e-17	9.21903425231629e-17	2.345926333221476e-18	2.684843866110286e-18	6.947688208755528e-18	1.2959696723447464e-17	-2.5709038542020252e-17	-9.095422161816072e-18	7.890532391487793e-18	2.663077414930856e-18	-3.9234233923847134e-18	-3.1729992344007544e-18	4.8912867723902216e-18	-2.2023442107377512e-18	-9.748452978504836e-18	3.638509922446221e-18	2.57824068654472e-17	-3.356637961134936e-17	1.5210564994628093e-17	-7.724952770734058e-19	1.886344357553943e-18	-2.3114885667926568e-17	2.9758884575691733e-18	3.5940816743645e-18	-3.67053355012085e-18	-1.8801701369478254e-17	9.704444392628213e-18	-6.868224034529056e-19	-1.5238432463980357e-18	-2.9440274720013466e-17	2.0026303983379257e-18	2.8278576192772614e-17	7.508485775411467e-17	2.3086015570561565e-17	-6.511502331468131e-18	9.188395206054985e-18	8.536473483296658e-18	-1.0730431038779105e-17	8.378325047653869e-19	-5.286357044850675e-18	-5.295885954780945e-19	-1.414436994149969e-17	2.1762104235069432e-18
FoxO signaling pathway: FASLG	-2.826002435349284e-18	7.185750141593192e-19	-1.0462638050622053e-18	6.624173693342518e-18	1.0180064144659034e-18	-9.585857434852566e-19	8.670366269266052e-18	-2.685047500808479e-17	1.9128541957483666e-18	1.452535428257116e-18	-1.7983086647598913e-18	4.606284259752185e-18	-5.969735291023058e-18	8.546279465181005e-18	-4.492418031949413e-18	7.918174113534875e-19	-1.879689853726926e-18	-1.6898373989819294e-18	-9.32080319318093e-19	7.501115856540919e-19	-3.1542241581376863e-18	-1.6872044011495272e-18	-4.7985804165681196e-18	4.510648671937377e-18	8.212139419060114e-18	-2.2915501815527423e-19	-5.666207733619969e-19	-4.06659283683644e-18	1.5055263158167142e-18	-8.341720022461455e-19	-1.2598932776412013e-18	-5.409465194391849e-18	3.972282043118725e-17	4.1292553249705884e-19	-4.917704801750028e-19	-2.399436284482357e-17	1.5403958802605409e-18	6.174907823272508e-18	1.61824820603284e-17	5.994344165326497e-18	-3.648597348970494e-18	1.2172075206024345e-18	-1.5042896581696233e-18	5.009524032082928e-18	4.513244263329304e-19	-1.0098627287553341e-18	-3.6542338070914603e-19	-1.0454410666846288e-17	-1.0629994365013185e-18
FoxO signaling pathway: BCL2L11	-7.112808186626738e-18	1.917169748901729e-18	6.7981819718803875e-18	8.439885173477835e-18	-3.0899419968256864e-18	1.4175658471988393e-18	1.5752637384894205e-17	2.209717388341944e-17	2.078399536167581e-18	1.763656586801991e-18	4.183849210195277e-18	1.260303082010402e-17	-2.233380198212093e-17	-7.043235928620955e-18	1.4486023526604674e-17	2.393277666981538e-18	-2.4758408414240744e-18	-2.4245662787296306e-18	-2.544905484990821e-18	-1.6735629056194291e-18	-7.537837966601128e-18	3.4483693173452713e-18	-1.294048737950192e-17	-1.7337946041797632e-17	1.0409142078793446e-17	-6.550535809287875e-19	1.4300150797161878e-18	-1.994631421769052e-17	1.4902546619562045e-18	2.5629125846660683e-18	-3.2835713522099667e-18	-1.1370743811724345e-17	1.617647531492149e-17	-5.982304162190668e-19	-1.0697621587320246e-18	-4.380854920185623e-17	2.5769273232121067e-18	1.7748379150291268e-17	3.80632335090082e-17	1.6325914275000113e-17	-5.6728862328921764e-18	4.44914570212055e-18	5.924451286086562e-18	-6.725137740433965e-18	5.664982171478029e-19	-5.366822609551529e-18	-3.7119493575752746e-19	-1.3730719221605724e-17	-1.5029807383884353e-18
FoxO signaling pathway: TNFSF10	-7.019572444422998e-18	2.0311806343511788e-18	-9.020916352021108e-18	1.1191348779844494e-17	3.138361999992842e-18	1.5423772808167008e-18	3.8646559380975e-17	2.613281063268077e-17	2.6872181263604373e-18	2.1901254778064938e-18	5.9715963431662684e-18	1.2086954850484129e-17	-2.2098600956863352e-17	-6.8074983033457726e-18	2.4089952578773946e-17	2.39313504000641e-18	-2.56712733612001e-18	-2.209491195115741e-18	-2.617678589379412e-18	1.4714368948807393e-18	-8.802691784942856e-18	3.298475925859371e-18	-9.570924305151584e-18	-1.1487509517893865e-17	1.3738358857827279e-17	-6.68611780803958e-19	1.2023456683490899e-18	-1.4929563434379302e-17	1.6036381997885488e-18	3.5421009858922975e-18	-4.098328458277139e-18	-1.3609892591952548e-17	2.235503844100916e-17	-3.190395993366711e-19	-1.3379077546449799e-18	-5.68280413600226e-17	2.023358929599372e-18	2.932726914657279e-17	6.974105777015858e-17	2.105727656906493e-17	5.927492840866652e-18	4.2042967899080384e-18	6.937577742157041e-18	1.3190620373479697e-17	7.843990400693532e-19	-4.6598784684520794e-18	-4.021154359335075e-19	-1.5921912425867662e-17	1.642921197330143e-18
FoxO signaling pathway: BCL6	-9.12930447218921e-18	2.5972558856387313e-18	1.2669965133609849e-17	1.2127326956409441e-17	-4.414415557972482e-18	2.8026348894252732e-18	1.9329001995312328e-17	8.516434588381314e-17	-5.2802538972385416e-18	2.246898369485516e-18	7.71894656114869e-18	1.3671105433515398e-17	-2.707081577344081e-17	-1.056256072726136e-17	2.027611446543068e-17	2.328641208352409e-18	-4.756747080233124e-18	-3.2362814179793025e-18	-3.868721600433988e-18	3.44158667496222e-18	-1.1054293282854724e-17	4.6397465576303695e-18	-2.0094048622963468e-17	-2.7025414316814678e-17	2.2596278432590886e-17	-1.0339810666973333e-18	1.998292696157617e-18	-2.2234662934005187e-17	1.8058344748956e-18	3.886523495113423e-18	-4.155732866700975e-18	-1.7251925852318218e-17	1.561378687440957e-17	-8.591592659332785e-19	-1.5815848582141154e-18	-4.356672754445805e-17	-1.7438551747784125e-18	2.799672396439179e-17	9.789279061414572e-17	2.635001013238817e-17	-7.651333711657553e-18	6.90990821113951e-18	8.231280128214215e-18	1.0876030220830197e-17	6.730108635113488e-19	-4.245370670890771e-18	-4.91729193398369e-19	-1.4645069735931578e-17	1.83735358116025e-18
FoxO signaling pathway: BNIP3	-7.850377987186074e-18	1.8666526890080137e-18	7.686234019380556e-18	8.054778775879464e-18	-3.709296410833314e-18	2.461970263266087e-18	1.199601466723638e-17	3.28419826569263e-17	2.1641092612736736e-18	2.3501554239282838e-18	4.9995171076154514e-18	1.2283026429284205e-17	-2.0205155219470484e-17	-9.930627397631999e-18	1.1547888284306305e-17	-8.636831025851164e-19	-2.39673374208357e-18	-2.309493880044956e-18	-3.577772284652496e-18	-2.1834993409375813e-18	-7.854949267124126e-18	3.2031216505068093e-18	-1.2636546753663666e-17	-2.0306616267256924e-17	9.918511846063104e-18	-8.062783690349492e-19	1.391514486549106e-18	-1.7968163130519848e-17	2.505074564914093e-18	3.520901331334476e-18	-3.044010694893394e-18	-1.085431331494384e-17	-9.934795935387253e-18	-9.464076015175914e-19	4.843876209199747e-19	-3.456046308290392e-17	2.2897332260635933e-18	2.1804258576207683e-17	3.5342959812186746e-17	1.70142073593763e-17	-5.773002512670722e-18	5.352137083270482e-18	7.502552122370365e-18	8.319758270963607e-18	6.04691354986907e-19	-6.179399130429943e-18	-3.9072027908472496e-19	-8.547561692491808e-18	2.1116485067677284e-18
FoxO signaling pathway: ATG12	-7.893223993763576e-18	1.694673147549836e-18	8.554827732428943e-18	7.675193470829939e-18	-3.214801077704993e-18	1.7392782963302088e-18	8.635284800966719e-18	6.012338629418841e-17	1.88712462944244e-18	1.660317529150852e-18	5.4967926654070015e-18	1.164222210058312e-17	-1.993718604711448e-17	-8.439497316907762e-18	1.0983175010240837e-17	1.0290685844557306e-18	-2.5855622316533597e-18	-2.171347284271397e-18	-3.4429965476902577e-18	-1.906769364641301e-18	-7.386796830185424e-18	3.206087182769004e-18	-1.5707062368674278e-17	-2.4861594758954945e-17	1.0152138338046684e-17	7.390938517636074e-19	1.39876118818388e-18	-1.7823698066865304e-17	1.3668022722582085e-18	2.759221540564563e-18	-3.2837273891230812e-18	-1.1652243815338192e-17	9.057981144857778e-18	-8.91368585102085e-19	-1.1102179793240284e-18	-3.0022418019334e-17	2.2117965893350357e-18	2.042516634843025e-17	4.493734116449323e-17	1.7347706997946444e-17	-6.002528840435674e-18	6.534773306270471e-18	6.994876540559536e-18	7.10090347059667e-18	4.592734575154783e-19	-4.919614167442818e-18	-3.5244743270383673e-19	-1.2203468162074619e-17	2.00370854606172e-18
FoxO signaling pathway: GABARAP	-9.676603182921965e-18	2.32722635005339e-18	-1.1059946562417077e-17	1.2685822692194233e-17	-4.235198124348041e-18	2.188004268301058e-18	1.129438666659892e-17	7.241258231023096e-17	-3.117443991821121e-18	2.0753531622178945e-18	6.54100377936221e-18	1.4343324380378184e-17	-2.5450840044279144e-17	-9.98105932626548e-18	1.3635124913806909e-17	1.95683125577909e-18	-3.8642522456861975e-18	-3.2749159497746426e-18	-4.227582602283025e-18	-2.055187798910678e-18	-1.099954234771677e-17	4.174216744361799e-18	-2.075596236240922e-17	-2.811998276611891e-17	1.5246399858800938e-17	-8.911831427121823e-19	1.860803849401522e-18	-2.3414273033091655e-17	1.8233616328910453e-18	4.1161078614297226e-18	-3.767380893712669e-18	-1.4993426142599534e-17	1.1542718783352516e-17	-9.447742826442632e-19	-1.421417511594307e-18	-3.5236844740304015e-17	3.0175048428386737e-18	2.5330955063358612e-17	5.40030558864822e-17	2.123584655260956e-17	-7.17467052321371e-18	7.356187382441492e-18	8.656009000159462e-18	-1.0496964842910742e-17	6.656508463817484e-19	-5.861073927854955e-18	-5.024575071466596e-19	-1.7972717548850365e-17	2.468140699776644e-18
FoxO signaling pathway: CAT	-9.197488278068265e-18	2.80426755536471e-18	1.0131363069418058e-17	1.1141671736862609e-17	-3.569647291163759e-18	1.9832454843478e-18	9.621095711476069e-18	4.3457181103944e-17	-3.0757874027614493e-18	3.0150099501640723e-18	7.071654287580187e-18	1.3307562731944124e-17	-2.2098738253374602e-17	-9.907706905976493e-18	1.0285011041995993e-17	1.4612543973849222e-18	-3.068915674441124e-18	-2.7011197607840157e-18	3.6217841707584574e-18	1.6644184908844494e-18	-1.0490312800281353e-17	3.984115870833087e-18	-1.7438928994910202e-17	-2.1316548745553006e-17	1.604638370490115e-17	-8.382374738115232e-19	1.3501922738290182e-18	-1.6198932927727e-17	3.111072639669828e-18	3.693436492934171e-18	-3.619941302462006e-18	-1.6781731560892182e-17	1.035170715370464e-17	-7.976040092725672e-19	-1.2706088725052136e-18	-4.927335647567974e-17	2.7108211672883326e-18	2.6189354372777377e-17	5.907788368831203e-17	2.1297546870243246e-17	-5.2235935549224135e-18	6.328096521342005e-18	8.205220006159954e-18	1.2262248917425053e-17	7.512801343373631e-19	-5.235289224339684e-18	-4.521499411629274e-19	-1.5839590487017108e-17	2.485400683122361e-18
FoxO signaling pathway: SOD2	-1.0128157455730982e-17	3.0619823901159338e-18	1.2316031053898669e-17	1.3271279097321829e-17	-5.3078771837912186e-18	2.542089725181032e-18	1.5712091861217392e-17	7.847692832823496e-17	-3.1873125609601714e-18	3.201067646299927e-18	8.625081700201916e-18	1.457265787645713e-17	-2.7820560739063567e-17	-1.0510637662832093e-17	1.493242692927229e-17	1.4153016510922846e-18	-4.271891702264502e-18	-3.596147559999353e-18	-4.298155134843625e-18	-2.0147363678926174e-18	-1.1717128891523506e-17	4.247124776594061e-18	-1.9072928331083164e-17	-2.697471048152939e-17	1.7535559943784698e-17	-1.1748873216289816e-18	1.7654475136977567e-18	-2.1095603730724285e-17	3.091325995167158e-18	4.5385463425602674e-18	-4.262842346409232e-18	-1.7991897913398038e-17	1.4372469054029808e-17	-7.20057748710479e-19	-1.5808795964614905e-18	-4.487826126666668e-17	2.544849634254859e-18	2.951451558369844e-17	7.984609742600811e-17	2.587333447959592e-17	-7.41527974434448e-18	7.112706870555824e-18	9.485239627860649e-18	1.2833983851759773e-17	9.118900090813922e-19	-6.093277367429689e-18	-7.712208699528176e-19	-1.6575107955286938e-17	2.502257804765794e-18
FoxO signaling pathway: GADD45G*	-1.130132529057772e-17	2.1778219637951137e-18	1.0160202476660674e-17	1.1114343008035625e-17	-3.939631401524069e-18	2.2852855801358887e-18	-1.2582294164585763e-17	9.21903425231629e-17	2.345926333221476e-18	2.684843866110286e-18	6.947688208755528e-18	1.2959696723447464e-17	-2.5709038542020252e-17	-9.095422161816072e-18	7.890532391487793e-18	2.663077414930856e-18	-3.9234233923847134e-18	-3.1729992344007544e-18	4.8912867723902216e-18	-2.2023442107377512e-18	-9.748452978504836e-18	3.638509922446221e-18	2.57824068654472e-17	-3.356637961134936e-17	1.5210564994628093e-17	-7.724952770734058e-19	1.886344357553943e-18	-2.3114885667926568e-17	2.9758884575691733e-18	3.5940816743645e-18	-3.67053355012085e-18	-1.8801701369478254e-17	9.704444392628213e-18	-6.868224034529056e-19	-1.5238432463980357e-18	-2.9440274720013466e-17	2.0026303983379257e-18	2.8278576192772614e-17	7.508485775411467e-17	2.3086015570561565e-17	-6.511502331468131e-18	9.188395206054985e-18	8.536473483296658e-18	-1.0730431038779105e-17	8.378325047653869e-19	-5.286357044850675e-18	-5.295885954780945e-19	-1.414436994149969e-17	2.1762104235069432e-18
FoxO signaling pathway: ATM	-8.282161006243772e-18	1.740150517371294e-18	7.806497591509339e-18	7.131650195342719e-18	-3.4161840415856397e-18	2.199578078093263e-18	-9.111920865066517e-18	5.062925505636218e-17	2.4702517754805392e-18	1.661697225946999e-18	5.145032691865063e-18	1.3115687073288012e-17	-2.2312992551291665e-17	-7.95952468775654e-18	7.031453134699192e-18	1.0235250045495374e-18	-2.4726065996589654e-18	-2.525124628103907e-18	-3.4964798498603575e-18	-2.1641718180079786e-18	-7.556496880059441e-18	3.2993549299263193e-18	-1.500880481335273e-17	-2.525901016709301e-17	9.612212143291156e-18	7.759231931126879e-19	1.7133922922835221e-18	-2.130406888808877e-17	1.1293963711151917e-18	2.523444551713436e-18	-3.4733823600493574e-18	-1.1064380812168593e-17	1.3762088580865585e-17	-9.441093269140825e-19	-9.13738605728043e-19	-3.718410435791367e-17	2.4407981298540858e-18	2.1508432457464625e-17	3.629285227501872e-17	1.7193245740536808e-17	-7.29251258468164e-18	6.102879581846857e-18	7.730126869684601e-18	7.691116277917703e-18	4.647077727484096e-19	-5.786357058310831e-18	-3.4949879735720253e-19	-1.2947408018887549e-17	1.989328965219843e-18
FoxO signaling pathway: PCK1	8.201061941736287e-18	2.191776626518077e-18	-6.412820369363934e-18	9.532757758664003e-18	-2.7799977724088926e-18	1.954840068741557e-18	-1.1053729445610389e-17	1.9371646505678066e-17	2.2672317680795226e-18	4.2754604801827734e-18	6.186335560962825e-18	1.4029909883532857e-17	-2.040169484676809e-17	-9.996597641718045e-18	1.3151209338216785e-17	9.273706410571064e-19	-2.193338454819938e-18	-2.211300999091708e-18	3.409853606123902e-18	-1.9564566165294217e-18	8.042058482802864e-18	3.285074694492001e-18	-1.3953471570838914e-17	-1.7014943841047757e-17	9.128243833890476e-18	4.472086964664778e-19	1.6692874071834529e-18	-2.148989250891551e-17	5.756959854313512e-18	3.338929900577737e-18	-3.097085068709116e-18	-1.29600636349982e-17	9.16979245692942e-18	-1.036135679291014e-18	-7.86162165995432e-19	-5.588598950468055e-17	4.143920333336036e-18	1.6960948764932213e-17	4.993355097846632e-17	1.8320739104893706e-17	4.475896927522029e-18	5.670084825395906e-18	6.791001968914109e-18	-8.144298279505503e-18	9.892657450312444e-19	-4.4392772353717346e-18	-5.0424166768897165e-19	-1.1699304414042359e-17	-2.4310598509430864e-18
FoxO signaling pathway: G6PC	5.999716915690408e-18	1.5683418925342397e-18	6.218393022429193e-18	8.390839083466264e-18	-2.5343677766760804e-18	1.457517233163772e-18	-9.209932857777688e-18	3.133771315193086e-17	1.4502923527574006e-18	3.2378568845912293e-18	3.878223351688867e-18	1.0253560128434832e-17	-1.5621804973739375e-17	-7.652457776246678e-18	-5.381733029322015e-18	7.187778535664537e-19	-1.9493892556345253e-18	-1.7546579837678893e-18	-2.6882932688420706e-18	-1.6690870883052217e-18	-5.934901878900848e-18	2.4869112211361897e-18	-1.0048809806614539e-17	-1.628555481496038e-17	7.310517597138788e-18	-5.577198645888135e-19	1.471567290151153e-18	-1.5696002283980638e-17	4.114652245798428e-18	2.9810559061819656e-18	-2.79989604092084e-18	-8.421117674110264e-18	6.313368868767837e-18	-6.395775528402794e-19	-5.798106719683397e-19	-2.9581413560391053e-17	2.604553001081864e-18	1.222960512151326e-17	2.3720758965190546e-17	1.281424807219856e-17	-4.147369680510756e-18	4.2683226960708415e-18	5.9936165268225695e-18	-5.493087124284769e-18	7.048148383767677e-19	-3.8751152169558294e-18	-4.601251843368666e-19	-7.934829669792536e-18	-2.194805598568283e-18
FoxO signaling pathway: BCL6*	-9.12930447218921e-18	2.5972558856387313e-18	1.2669965133609849e-17	1.2127326956409441e-17	-4.414415557972482e-18	2.8026348894252732e-18	1.9329001995312328e-17	8.516434588381314e-17	-5.2802538972385416e-18	2.246898369485516e-18	7.71894656114869e-18	1.3671105433515398e-17	-2.707081577344081e-17	-1.056256072726136e-17	2.027611446543068e-17	2.328641208352409e-18	-4.756747080233124e-18	-3.2362814179793025e-18	-3.868721600433988e-18	3.44158667496222e-18	-1.1054293282854724e-17	4.6397465576303695e-18	-2.0094048622963468e-17	-2.7025414316814678e-17	2.2596278432590886e-17	-1.0339810666973333e-18	1.998292696157617e-18	-2.2234662934005187e-17	1.8058344748956e-18	3.886523495113423e-18	-4.155732866700975e-18	-1.7251925852318218e-17	1.561378687440957e-17	-8.591592659332785e-19	-1.5815848582141154e-18	-4.356672754445805e-17	-1.7438551747784125e-18	2.799672396439179e-17	9.789279061414572e-17	2.635001013238817e-17	-7.651333711657553e-18	6.90990821113951e-18	8.231280128214215e-18	1.0876030220830197e-17	6.730108635113488e-19	-4.245370670890771e-18	-4.91729193398369e-19	-1.4645069735931578e-17	1.83735358116025e-18
FoxO signaling pathway: IL7R	-6.996603688525339e-18	2.265393955097404e-18	5.7507241048375015e-18	9.266325748863512e-18	-2.08539595237042e-18	2.5342054885517643e-18	1.1207915399808277e-17	3.669185528776985e-17	1.975545936168971e-18	1.2431972192477605e-18	4.275697375501233e-18	1.2288223228718673e-17	-1.857951497966828e-17	7.632977824838994e-18	1.0396067377196309e-17	-2.5202032790552592e-18	-2.9642474328226182e-18	-2.8650149192336593e-18	-2.3126496604658576e-18	1.33471787317231e-18	-7.116931052101877e-18	-2.5172667277675186e-18	-8.693324479744569e-18	-9.038257030739247e-18	1.389609803737357e-17	4.595379870832935e-19	1.3545340045006664e-18	-1.350799778881822e-17	6.106196949726456e-19	1.8046828935865627e-18	-2.6847304607244007e-18	-1.1467811512073809e-17	6.466283808671426e-17	1.2312836348189124e-18	-1.2935856751140371e-18	-5.86287292583155e-17	3.358049588090989e-18	1.739292281671185e-17	4.993166313498945e-17	1.7792716518781155e-17	-5.059577084537332e-18	3.3872372258658963e-18	6.860593672155879e-18	-6.804988606136563e-18	5.402478449037912e-19	-2.366024915008804e-18	-4.9401097154402565e-19	-1.59571775789029e-17	1.3079740194649068e-18
FoxO signaling pathway: KLF2	-8.226924288333178e-18	2.11912768438386e-18	1.0067363137481485e-17	9.848340805149164e-18	3.771649296936027e-18	1.7039698842157782e-18	-1.4523396160777852e-17	7.429883600365366e-17	-2.1829633231155415e-18	6.355330981534941e-19	5.254046948277089e-18	1.352401086502036e-17	-2.163810130639137e-17	-8.262427991693555e-18	-8.161067858611507e-18	4.312518528408431e-18	-3.921024318008597e-18	-3.2686493515482666e-18	3.882835926012661e-18	1.6469904146534341e-18	-9.288979228460429e-18	4.65514662817801e-18	-2.017137020756032e-17	-2.5364127347472866e-17	1.8964073333569626e-17	-9.656610060234992e-19	1.67632016793318e-18	-1.8679620314876132e-17	-1.6576116019791468e-18	3.044351304040052e-18	-4.598343983048917e-18	-1.6001483490961306e-17	1.7323888110229005e-17	-6.507109264249372e-19	-1.9905444607113417e-18	-3.629547853505351e-17	-1.8699067196876208e-18	2.7597103751573206e-17	9.506704037202371e-17	2.2531103702065528e-17	-7.400597023689264e-18	7.35985258713042e-18	7.142193363050958e-18	-9.754632618488502e-18	4.727992835037065e-19	-4.3499483731858745e-18	-3.2936064232010617e-19	-1.5249128259183106e-17	2.2014651919119328e-18
FoxO signaling pathway: S1PR1	-7.386261034600688e-18	2.34215529098786e-18	-9.750631912939498e-18	1.0565583197515376e-17	-3.0260846741956857e-18	2.16768292785674e-18	-2.329018951375279e-17	4.2412822204442106e-17	2.3035051142864763e-18	1.4482696185772394e-18	6.3959258383552195e-18	1.0783812749693528e-17	-1.7733276488976998e-17	-6.715808181560109e-18	-8.653824995269384e-18	1.3885416039289745e-18	-3.0302373091916008e-18	-2.6958587833953773e-18	-3.276260721090984e-18	-2.270049288029032e-18	-1.0588000615797456e-17	3.441153325219158e-18	-1.543199385276818e-17	-1.3362326810163259e-17	1.496739190367548e-17	-6.235934050211592e-19	1.6119307456468934e-18	-1.2442358394795837e-17	-7.22009450701246e-19	2.9921840670089817e-18	-4.0970659734720884e-18	-1.3344044445969913e-17	2.1090449227905985e-17	-5.31255495258584e-19	-1.566249729600569e-18	-4.916429547147856e-17	1.3332396664334028e-18	2.7581296353109128e-17	8.088093303292994e-17	2.0004600238627197e-17	-3.609577424161326e-18	5.019271228776196e-18	7.261541138506663e-18	1.287859070820849e-17	6.387684493617814e-19	-4.515414305249371e-18	-4.913680811655045e-19	-1.8234585044385277e-17	1.883132568277828e-18
FoxO signaling pathway: RAG1	3.5756468400381736e-18	8.184656657148723e-19	2.2979651713368544e-18	1.687445723964084e-18	-1.1841611369733429e-18	6.028522731210963e-19	-1.7379321291554857e-17	-6.315993598575004e-18	8.84257542015052e-19	7.896340128374682e-19	2.7982321484311805e-18	6.888167437219964e-18	-7.365329034261602e-18	-3.3672302949132648e-18	-9.34501747501898e-18	-7.888271210230088e-19	-5.986103465755472e-19	4.945771829729516e-19	1.1513680784886224e-18	7.395494885630909e-19	1.8217719746686483e-18	1.0875403362968209e-18	2.288577024814419e-18	-6.758975742705858e-18	-3.2913902878228003e-18	3.203803341714164e-19	7.025417231530338e-19	-6.233092541842948e-18	8.310752501025215e-19	8.745575682781657e-19	-1.487514345619624e-18	-1.6755681465224668e-18	5.6953804817436825e-18	-4.618534885510637e-19	-4.527218915676681e-19	-1.9127441302629426e-17	1.3958731464782371e-18	5.868252191045702e-18	9.566886755986357e-18	6.895019870843739e-18	-2.3058687695830013e-18	2.121194954054556e-18	2.7384656702963918e-18	2.040495457112363e-18	2.6690122669802296e-19	-1.1820971875906552e-18	1.5253275734048114e-19	1.9805551212347617e-18	-8.470643001429708e-19
FoxO signaling pathway: FBXO32	-9.267012198562946e-18	1.6809473935682117e-18	1.0365747109934205e-17	7.461516582006649e-18	-4.159334044818365e-18	-1.6298527892990474e-18	1.1670030598975381e-17	1.4203852393966721e-16	-1.6489560522746536e-18	1.4735980899946684e-18	6.5332018566205744e-18	1.4771482460533485e-17	-2.004368135297306e-17	-1.1865079374894293e-17	1.183107908791979e-17	3.65012820502912e-18	-2.61113878689552e-18	-2.042411769125326e-18	3.844514485247109e-18	-1.7111796215820557e-18	-6.352148857319654e-18	4.1876955116887064e-18	1.905481619501232e-17	-3.294863353588196e-17	9.742648110804457e-18	1.3011955076932748e-18	1.5061788541430406e-18	-1.9798262032844686e-17	1.0458787003390029e-18	3.1615552532241855e-18	-4.411113356887711e-18	-1.1405193806287017e-17	-2.445780430968132e-17	-1.2401438758210954e-18	-1.426238825364027e-18	-2.398721415942034e-17	-2.2949575576373887e-18	2.0213291119110928e-17	5.0362357880822104e-17	1.774984292659905e-17	-7.519315789919537e-18	8.444907950764574e-18	6.6815112381683735e-18	-5.7929262411635346e-18	4.282109153268063e-19	-5.157713069880605e-18	-3.039768025667678e-19	-7.477915257251191e-18	2.6779778173765552e-18
Sphingolipid signaling pathway: MAPK1	-1.0329028939496977e-06	2.74042395573807e-07	4.892339200444042e-07	1.4393132235247938e-06	4.525021967182156e-07	6.010178266283292e-07	1.0466526986056289e-05	1.3747914737871164e-05	5.018239510904983e-07	-1.8593422653142336e-07	-9.640234841323653e-07	-2.232124361593094e-06	2.3791381423450587e-06	3.1901188893353187e-06	1.0713901761832646e-05	-4.44126141332563e-07	-4.290446618651229e-07	-3.616545339054826e-07	3.623065737371663e-07	-3.3760520948690186e-07	-2.100764181812903e-06	-6.756286387607082e-07	-3.0265238591453487e-06	2.035917308186904e-06	3.823659623680431e-06	-1.2268292403928756e-07	-5.511168613319085e-07	3.5954613755785907e-06	-8.503839447278683e-08	9.642930158860257e-07	-7.580239676486505e-07	-2.1899677788504355e-06	8.355057632971175e-06	1.5476030703531846e-07	-3.33213477659338e-07	5.968761481009728e-06	5.11402444689835e-07	5.000772830589465e-06	1.395520499947504e-05	4.160031710358411e-06	1.1152781835561655e-06	7.135904361392782e-07	8.93483861014874e-07	2.669717949807883e-06	7.113063714434418e-08	-5.871888591138761e-07	-8.70732076932854e-08	-3.132177548818722e-06	5.529881095314272e-07
Phospholipase D signaling pathway: MAPK1	-6.204067621081892e-07	4.283632470120242e-07	-4.170710347840286e-07	7.64030290826536e-07	-4.386123986284191e-07	3.870532253295901e-07	6.845524191710397e-06	5.168967431746586e-06	-7.497520839243513e-07	-3.130039027672247e-07	5.881924874470187e-07	-9.71510962504618e-07	-9.751645388233549e-07	1.4767793822687612e-06	7.099860311959777e-06	-2.0917234416465282e-07	-3.2714987181168856e-07	1.7289183527422477e-07	4.715764557888986e-07	8.63053518377584e-07	-8.292605004573106e-07	-4.183218408256064e-07	1.609144994290424e-06	2.108802920411221e-06	2.702762629391729e-06	-8.059738812936936e-08	-4.709804132728769e-07	2.232503535830065e-06	-3.869760829318754e-07	6.636129688006713e-07	-4.99863771213269e-07	-2.2352373472161546e-06	3.221774400507159e-06	8.477601442665902e-08	8.251718924486823e-08	2.2653931041094963e-06	3.86728505494664e-07	5.21719915689405e-06	1.0098466684403526e-05	2.9798018301518424e-06	8.046613480173565e-07	3.250881818934458e-07	7.799828876529651e-07	2.6769722945243244e-06	-7.787378806731958e-08	6.930195877660916e-07	-8.749332622168589e-08	8.768905009344625e-07	3.672906230419962e-07
Phospholipase D signaling pathway: Sphingosine 1-phosphate	-6.722973046313856e-06	2.4168898153734336e-06	3.3730391685773634e-06	-2.6011299722013294e-06	-1.6982210675212285e-06	1.9529068914611003e-06	3.07061660982697e-05	1.97769984380911e-05	2.834538468853118e-06	-1.6917157212241342e-06	2.3633153562838984e-06	-6.502850304344912e-06	-1.0211902179716116e-05	-3.856956943732745e-06	2.150465173375457e-05	-2.317538168892156e-06	-1.612606275370656e-06	4.745455938489394e-07	1.753258654869416e-06	4.632584287188461e-06	3.263855718251588e-06	-2.3867323095222963e-06	3.271488011208641e-06	8.596827077384856e-06	1.361802988229586e-05	-9.267045015195118e-07	-1.0336938574294334e-06	2.775121074738106e-06	-2.924300879631017e-06	2.294510858867693e-06	-1.5661787453503517e-06	-8.495356361791925e-06	-1.9848611258696403e-05	9.399950708462444e-07	6.331140465967061e-07	-2.7799643340226984e-05	3.872334820873003e-06	2.565723508434497e-05	0.0001164112285989	2.4211970928169064e-05	6.050444666429085e-06	3.0083785148442467e-06	7.299333172612757e-06	9.409098384574163e-06	-4.978166012293723e-07	5.085168612068028e-06	3.18756070067109e-07	8.83163441345191e-06	2.5522920420314493e-06
Phospholipase D signaling pathway: MTOR	-3.561409266869946e-06	2.469144124846837e-06	2.5375194376795143e-06	-1.706871250753241e-06	-2.4854669081638903e-06	-1.714410801821133e-06	1.6501486947762373e-05	2.2246340747279216e-05	-2.8043418136527214e-06	-1.4518773070289264e-06	2.94288642304098e-06	-3.378275918402217e-06	-2.6815014369721e-06	-2.4166812403701778e-06	1.5450334779847456e-05	-5.176432264782976e-07	1.7850675451174542e-06	6.514421213645849e-07	2.089379534233771e-06	5.632608125252892e-06	1.7648083001534322e-06	-1.4732707937353423e-06	3.757064639662513e-06	8.166445685037603e-06	9.315143249260296e-06	-1.3814965443301838e-07	-2.057665771204976e-06	8.732222291396433e-06	-1.963899198860755e-06	2.67266333771704e-06	6.817611280988158e-07	-7.7801047680336e-06	9.10151108673955e-06	3.7084629120790324e-07	4.772392531047216e-07	-4.312618508066278e-06	2.636889631528072e-06	2.4266842349437443e-05	5.61419687344826e-05	1.2780928255006783e-05	3.1917561664784467e-06	1.686068227821799e-06	4.627259133971639e-06	1.3861913528097722e-05	-3.4374144577913614e-07	4.522650459684038e-06	-3.739579893493501e-07	7.327653366744861e-06	1.4991369962847125e-06
mTOR signaling pathway: EIF4E	6.4061281608357256e-12	-1.8692589135330176e-12	2.4280819957542465e-12	2.049209522051167e-12	3.4805077591992186e-12	-3.626129628779344e-12	1.3604997812933258e-11	1.3937124627837486e-11	-6.7875955212383e-12	1.4101850533397216e-12	3.0582890862765084e-12	5.177125927262312e-12	3.2983228971911112e-12	-1.4061482709152236e-11	9.70815140423724e-12	1.8024297228967544e-12	-1.5044890559679226e-12	9.872832411610166e-13	1.4833346446747857e-12	6.152014116000636e-12	5.099492804888808e-12	1.550341409733406e-12	1.0335358699612729e-11	-1.526629562326421e-11	-3.328651357593974e-12	-7.400375199892326e-13	9.49703868056301e-13	4.746477345285722e-12	3.331763507667393e-12	2.966563539419989e-12	-2.1880818468261924e-12	-5.633178135335433e-12	-3.14528087917351e-11	-7.771059631394978e-13	-2.126734789854302e-12	-7.225516242602118e-12	-2.5539348894365096e-12	6.357086525462793e-12	2.0245506119356196e-11	5.191669313360045e-12	3.9643666789318816e-12	3.792443955806136e-12	2.343249363400931e-12	1.0662923952055476e-11	5.786261653958631e-13	5.784061465326957e-12	-3.082629535732331e-13	1.1282960202696024e-11	-2.0243039840217843e-12
mTOR signaling pathway: EIF4B	-5.952535649619396e-12	1.3943240060431973e-12	-3.0264900045408936e-12	-2.489411364494097e-12	-4.032410447443421e-12	5.27967918839298e-12	7.850201687459185e-12	2.7240934016981298e-11	9.991677815423736e-12	-1.956085341279852e-12	-4.530119538035404e-12	-7.2285958259002925e-12	7.784625684892276e-12	2.4407730218659978e-11	1.187584344118402e-11	-3.279593669062967e-12	2.026553019211501e-12	-1.3427158460983861e-12	3.018705702045416e-12	-7.347825870829611e-12	-7.072202025707931e-12	-2.250480445050548e-12	-1.7015651779973864e-11	1.6229472719805138e-11	5.25604947337395e-12	9.53226825001845e-13	-3.252368203489077e-12	-2.9089901540157835e-12	-3.2153581089680497e-12	-3.1771663245087167e-12	1.865136558511633e-12	7.084297279781191e-12	4.428132969808868e-11	1.0591748518466337e-12	1.7573763255164598e-12	2.9472297041103546e-11	1.980871050028006e-12	-1.4188351323293412e-11	-3.7864506370283197e-11	-1.3805981909256843e-11	-3.107715863179869e-12	-4.0100097630177986e-12	-4.011117859814258e-12	-1.7006406872068642e-11	-6.005970431932644e-13	-5.559687140426438e-12	3.920189333916865e-13	-2.1874546371729547e-11	1.8135596659527765e-12
mTOR signaling pathway: RPS6	-7.04079050594351e-12	1.5887062934806357e-12	-3.6697449128323486e-12	-2.945411626668076e-12	-4.455867865262321e-12	5.784055680916237e-12	1.169214042948695e-11	2.9271431487848906e-11	1.1369117521416866e-11	-2.241056570163952e-12	-5.1128369102933104e-12	-8.725643757664112e-12	9.186159772266149e-12	2.649525038277873e-11	1.7725818114993944e-11	-3.5353137598699497e-12	2.2628187805608472e-12	-1.4149797222609525e-12	3.191705937970288e-12	-8.410541118200433e-12	-7.681626810676493e-12	-2.389402146557377e-12	-1.8765589291969556e-11	1.9096444941769923e-11	6.373476984045378e-12	1.0964028346193422e-12	-3.621935034999496e-12	3.699413183222066e-12	-3.729601477838944e-12	3.973702924897537e-12	2.2550897393451945e-12	8.251670859818012e-12	5.1758610991778054e-11	1.1657715534153957e-12	1.968377664851177e-12	3.1382700899926146e-11	2.367267480734243e-12	-1.6382305427494545e-11	-4.269803591466749e-11	-1.633905694071605e-11	3.687648200559976e-12	-4.8669193820667805e-12	-4.639301841136583e-12	-2.063870506914228e-11	-6.535422334720588e-13	-6.640637628183459e-12	4.669422217348574e-13	-2.4844603065790326e-11	2.323678451403352e-12
PI3K-Akt signaling pathway: GYS1	-5.535618097160265e-07	9.82330187049005e-08	1.381287550698117e-07	1.913908460650957e-07	1.351003608302619e-07	1.1171365136900119e-07	7.193882378254485e-07	2.461986858447594e-06	1.448915302073176e-07	4.0176367172844964e-08	1.1772289330030877e-07	5.876671152207173e-07	-9.488351900894234e-07	3.8573226070942243e-07	-5.31561342306257e-07	1.448052001429841e-07	-8.47150182543398e-08	2.2887030904270125e-08	8.93186551571093e-08	9.72406016155634e-08	-8.819236148289762e-08	8.146355679714478e-08	3.432918737469059e-07	-3.179496583062046e-07	2.865990434382153e-07	-5.2325841426855035e-08	-6.174428090434175e-08	-8.287113739492315e-07	4.8586602831723074e-08	8.42153453495737e-08	7.97967485524446e-08	-3.906874568361306e-07	5.65203220840749e-07	-1.2233715659304882e-08	-4.582838583495876e-08	1.6044904209996742e-06	-8.480708311631456e-08	1.1734595797272115e-06	3.348295847229405e-06	7.920047783613309e-07	3.424563967431836e-07	1.490433428877711e-07	1.868595011784059e-07	5.554868695999721e-07	1.2053079323389489e-08	-1.4043716592095652e-07	-1.8075605615551203e-08	2.862326435035261e-07	-5.1416554208428206e-08
PI3K-Akt signaling pathway: MYC	-6.751844680717594e-07	1.8577163790944838e-07	4.323844245178932e-07	-2.443356690809013e-07	-1.8742045968350425e-07	1.831300998972659e-07	1.538183750302738e-06	8.301769535512229e-07	2.521353005898011e-07	-4.5092333057022855e-08	2.473105722520995e-07	8.53212536300928e-07	-1.604447251659603e-06	-6.777895218057518e-07	1.211299652796153e-06	5.416564182329125e-08	-7.355758161661365e-08	5.097589849669861e-08	1.4921497324475725e-07	1.0576427731769733e-07	2.748859025681621e-07	1.3072685205558645e-07	-2.939166841371687e-07	-3.2324675356260745e-07	8.893601718921565e-07	-7.074079447498723e-08	7.571486435205545e-08	-1.1798689581389553e-06	-1.2418202680428712e-07	-1.0069653526096305e-07	-1.0251237857639645e-07	-7.451101109467976e-07	1.032924293863362e-06	1.4118192874806732e-08	2.6707201599889075e-08	-1.5218613327363225e-06	-1.1357297729120529e-07	1.672611673950409e-06	6.163101971195823e-06	1.7513449164474398e-06	-2.7893979917001724e-07	1.8055689398963418e-07	2.943738095940949e-07	4.732016820737586e-07	-2.5536979419374184e-08	-2.0630584607591161e-07	1.861256774789536e-08	3.7019077622856265e-07	9.60630573789851e-08
PI3K-Akt signaling pathway: CCND1	-5.481924815928133e-07	5.872046784766057e-08	1.7262875126014102e-07	-1.7252676571806568e-07	-1.1113095973123169e-07	6.27056863503898e-08	2.3309298518279404e-06	2.122808875582153e-06	7.924443148954655e-08	3.9254407235345645e-08	1.676859220556886e-07	6.56983194042705e-07	-1.1554240628107982e-06	-5.752352115466602e-07	8.68785626243984e-07	1.313483685235691e-07	-9.937295266990445e-08	7.945386070806333e-08	1.9049343197250665e-07	1.4812928849154656e-07	3.5975478606687026e-07	1.34971053126557e-07	7.187388716386232e-07	-8.09444954495839e-07	5.324488358542787e-07	-3.2164223128597685e-08	1.084699065765894e-07	-7.914458948527798e-07	-3.28140266772447e-08	-1.000416052108605e-07	-1.0734643137850538e-07	-7.06608924746354e-07	4.592007783110369e-07	5.4284113993825866e-08	-1.6166011750915057e-08	5.831411381514868e-07	1.6000135935928793e-07	1.7713818624135672e-06	5.990014892621542e-06	1.2077544370251055e-06	3.100913264813041e-07	3.92922963883161e-07	3.146719311303388e-07	8.341045553530657e-07	-1.4595841429810298e-08	2.744272579166467e-07	-1.3513696193697822e-08	8.6651425325493e-07	1.0192102978562157e-07
PI3K-Akt signaling pathway: CDKN1B	1.5806079024764767e-07	3.085996061792578e-08	6.404051695276152e-08	1.0823485112387249e-07	-5.009151196680119e-08	-8.06298849386301e-08	-1.0619656612331198e-06	2.5689532569880225e-07	-1.509891007114721e-07	3.2122129458374843e-08	9.268298899307933e-08	1.6875014528872364e-07	4.001299800410408e-07	1.9640263440607854e-07	-4.845102945028203e-07	3.2348509814710355e-08	-5.700562581103995e-08	-2.3090949580035703e-08	-4.0659042553652e-08	1.4789563990267113e-07	-5.6692040351072117e-08	-4.810621561537013e-08	1.008323797282777e-07	-1.617304690872097e-07	1.6449650884502673e-07	-8.359321329053644e-09	7.55078597347311e-08	3.622333867704505e-07	3.4966600288857104e-08	5.4357909338246855e-08	7.62314920305157e-08	-9.608024760086032e-08	-5.907969540123324e-07	-2.0510356667925082e-08	2.2019912275733262e-08	-3.159763608363865e-07	5.4865320250313924e-08	-1.1629843662548233e-07	-7.774217691782646e-07	-2.3171405709646962e-07	-1.7407427453005396e-07	-7.997022812638442e-08	-5.6526671306470455e-08	2.577667163033824e-07	-8.075141562192537e-09	1.1326948389433193e-07	-1.0913822100804248e-08	1.4791138631352898e-07	-3.940961960991727e-08
PI3K-Akt signaling pathway: RBL2	1.716115629659829e-07	5.52242048952348e-08	6.552504028555472e-08	9.829633344132693e-08	-1.0242270398414979e-07	-6.14710455201159e-08	-1.1333194150128707e-06	2.2659351678642013e-07	-1.3149282451348185e-07	3.972051572367584e-08	1.1557272507381749e-07	1.836629551030687e-07	1.7902482967586277e-07	-2.220251394468412e-07	-6.803587328480732e-07	-3.6463355161332166e-08	5.8424610738768243e-08	-1.9727713450450822e-08	-3.9444251435233596e-08	1.1691603947691513e-07	-5.1270293769566774e-08	-5.51333002745591e-08	8.592756146372818e-08	-1.0141503472463916e-07	1.0424461292254895e-07	-1.8010608929923372e-08	7.171046135124343e-08	8.086293100425986e-08	4.979692500304627e-08	8.152662862122066e-08	6.50765143900397e-08	-5.969598684675277e-08	-5.236158821053235e-07	-1.2327822290246584e-08	5.386189571812989e-08	-2.785887977756424e-07	5.697731249664458e-08	-1.901295034855709e-07	-6.837450056860542e-07	-2.053863429162985e-07	-8.959843878232698e-08	-7.164491119010937e-08	6.663217208034891e-08	1.5362771985837217e-07	-7.998229701744198e-09	9.234107118404279e-08	8.127607978832166e-09	1.9930615187284825e-07	-4.236509795578992e-08
PI3K-Akt signaling pathway: PCK1	3.245027090053174e-07	8.124692905770832e-08	-4.2802636488872265e-08	1.356706120996773e-07	-8.271993629720298e-08	8.35680967691554e-08	-1.2907142073115643e-06	-1.956947671934838e-06	-9.536937512275357e-08	1.5920317081762074e-07	1.9016207644870442e-07	3.770457159444017e-07	-1.429363281185404e-07	-3.480755534271687e-07	-4.860275881484946e-07	-7.1899392458011e-08	-3.797956646458779e-08	-2.278257286843401e-08	7.062084497087898e-08	7.055826239502673e-08	1.7923481187966177e-07	-7.88895083004115e-08	9.114454027679513e-08	2.600181976286022e-07	-2.012684392514216e-07	2.1771630991954017e-08	6.809938409185054e-08	-3.0330324419000165e-07	3.065493561939529e-07	1.332151000771986e-07	-6.073289254649974e-08	-1.52114577689204e-07	-4.919486126648904e-07	-2.44889048549114e-08	6.098664791160852e-08	-1.886102686151784e-06	1.5704566226045605e-07	-1.4580898254742897e-07	-1.0300291318126567e-06	-2.838484253903211e-07	1.9413587652897857e-07	7.53213255188597e-08	1.3776883826723113e-07	1.7247345723230998e-07	2.6330414775263122e-08	9.29942697300387e-08	1.21115840210768e-08	2.3816339334410206e-07	-1.241555992856595e-07
PI3K-Akt signaling pathway: G6PC	3.001935974394031e-07	2.3681556330004934e-08	-5.296828478650189e-08	1.0489315946160309e-07	-4.1356095489048776e-08	-4.905536697919954e-08	-1.513685518357414e-06	-9.917217052897709e-07	-1.138967532739018e-07	1.1284045941682321e-07	7.090790949095234e-08	1.550930937358731e-07	2.516419316617783e-07	-1.777077699718581e-07	-9.722218223002007e-07	-6.20146319065105e-08	3.5760888704744226e-08	-8.347307791506353e-09	-4.65536619465243e-08	5.7790531005694315e-08	4.4127255549428464e-08	-3.904923884118432e-08	-2.155273938986367e-07	2.3099401977745186e-07	-2.1446275456631338e-07	-1.029505040685078e-08	5.61833136211332e-08	1.4148653169354636e-07	2.200817355681477e-07	1.0687122211426439e-07	7.328237229202339e-08	1.2486480131758168e-07	-5.688928776663212e-07	-1.2307280095764968e-08	6.648303764234479e-08	-4.406593133049438e-07	7.505421370099275e-08	-3.365085562015349e-07	-1.9301938720106328e-06	-3.249077914449966e-07	-6.889404691851762e-08	-7.345297015987248e-08	5.03753712680958e-08	3.9927393398316734e-08	1.3423925714502678e-08	7.103920035438886e-08	-8.998956208543665e-09	2.401568478182892e-07	-6.515646279591799e-08
PI3K-Akt signaling pathway: FASLG	1.0567702056957901e-07	3.5954837981344875e-08	5.6500782482251744e-08	9.981517423871573e-08	6.638133726929235e-08	-4.9325501748710055e-08	-3.1658993000580574e-07	-1.3818069165531612e-06	3.766645203723004e-08	6.78193406562589e-08	-8.7472888486306e-08	1.925961850238094e-07	-1.788414574029625e-07	5.480530287705298e-07	-3.385857886347993e-07	3.0861480769990233e-08	-4.0657176976043266e-08	1.8077800031739328e-08	-7.005965212228407e-08	5.3839480604422545e-08	6.506079739751613e-08	-7.796369922072408e-08	-1.3046595371253093e-07	2.827592969860373e-07	-2.254738968341056e-07	1.2947542386316384e-08	4.882568226037772e-08	-5.0585520615216374e-08	7.895009393204916e-08	-5.2356004369782004e-08	-5.277168511507986e-08	-9.843020816523145e-08	1.7953878110392648e-06	3.3706046320962633e-08	-1.1576613998040898e-08	-9.581351053376391e-07	5.7601307274069775e-08	2.0124993437037059e-07	6.571236138725396e-07	2.0209819795719322e-07	1.441862186266044e-07	9.032401925650832e-08	-7.445691831659533e-08	1.9658698227452166e-07	2.1050103393922638e-08	4.503621238245683e-08	-1.1031150005838037e-08	-1.6025506323027665e-07	-4.7471708786453226e-08
PI3K-Akt signaling pathway: BCL2L11	1.012763389193055e-07	8.68159072767613e-08	4.271201021070024e-08	4.2339250279258954e-08	6.69432418761798e-08	-7.379711408372702e-08	-6.662019046211187e-07	-1.9443679637607558e-06	-8.202566733701043e-08	4.585165468925612e-08	9.849942480491503e-08	2.788029919888213e-07	-2.798637448464249e-07	1.1552807677576361e-07	-4.616508115142979e-07	4.5618720257251546e-08	-4.4175291331863175e-08	-2.4686553343205635e-08	-6.996259481034886e-08	8.93865508829932e-08	-7.183849696231467e-08	7.019200589446548e-08	-1.974703682856444e-07	2.422164527630097e-07	8.870286486701234e-08	-2.9163338237441662e-08	5.805960614141658e-08	-2.339613547786077e-07	5.2357248339617175e-08	4.7980845797318034e-08	-2.2137965480823707e-08	-7.400160522205311e-08	2.31509762682885e-07	-7.265542504469557e-09	3.6029002587842723e-08	-1.071765585317451e-06	-5.998715458854355e-08	-1.3755564669209826e-07	-5.79565747118174e-07	2.4418475278554904e-07	8.528565687755061e-08	-8.927123402422167e-08	-9.906545135147e-08	1.043806521097017e-07	4.182469314761339e-09	-8.683405087252352e-08	6.559798632078161e-09	1.623401161043984e-07	-3.6384335114230725e-08
PI3K-Akt signaling pathway: BCL2L1	-2.857505617192123e-07	4.039462264969801e-08	7.217044844430224e-08	-8.713884010165565e-08	-5.263028725986605e-08	5.708295187194625e-08	9.72987521137918e-07	1.1372667448974832e-06	4.221363397552062e-08	-2.9265506518205976e-08	6.646991180477374e-08	2.2910797910468614e-07	-4.788880288804312e-07	-1.262136774168447e-07	3.2368392628430534e-07	3.21604618688002e-08	-4.7498602409776494e-08	1.6938157373414474e-08	1.116870150764325e-07	-2.153306983702461e-08	-7.519711181321975e-08	-5.5491344383222025e-08	4.034485204938121e-07	-4.913751704902339e-07	2.342446663249658e-07	-3.409707806651251e-08	2.50860587729448e-08	-3.238930853304676e-07	-4.4023106296218166e-08	-8.530860734209808e-08	-6.38927805902559e-08	-3.287285739737663e-07	1.0069545922952063e-06	3.8286824881382265e-08	-1.0032321670098809e-08	-3.510196129483081e-07	-2.596686371395148e-08	2.3997179984591466e-07	1.9990343383786857e-06	4.950192166222757e-07	1.9154669344784105e-07	1.900591230582901e-07	7.405122469593386e-08	1.2955837689250286e-07	-3.499941220109504e-09	-5.3725212054377213e-08	-4.491460126055254e-09	-1.441159942625261e-07	2.8823259482349932e-08
PI3K-Akt signaling pathway: BCL2*	-2.653337760145344e-07	7.833932477382404e-08	1.327610682007514e-07	-1.3519400581039676e-07	6.582784684235797e-08	6.687354411009052e-08	1.934864043927663e-07	8.134334398459891e-07	1.424948473396754e-07	-4.84905091085134e-08	7.507960133619656e-08	2.395803394881981e-07	-3.6591565329382624e-07	1.4643835917096172e-07	-3.1487255022057786e-07	8.784616968807404e-08	2.9611066204451424e-08	7.117808714115021e-09	7.20510957737791e-08	-9.549426458617226e-08	4.8243930134809756e-08	3.657465448180191e-08	2.8792175638741626e-07	-3.066030131347078e-07	1.588467532390572e-07	-2.195172170378345e-08	2.6794768577590465e-08	-2.9575357177624616e-07	-1.1157383106508413e-07	-4.466539446836239e-08	7.41985183208263e-08	-1.9475708998490305e-07	6.757209898368865e-07	-1.3987288928150027e-08	-2.7026879180994356e-08	-5.587666872548323e-07	-8.538482725057508e-08	3.60184219115355e-07	2.4997065280754524e-06	3.421332579791795e-07	1.219457610471914e-07	1.245232667793827e-07	-6.308394537583831e-08	2.1403244930528318e-07	-9.169876477758848e-09	-1.2117436101660045e-07	-1.0323378610974193e-08	-1.6244650767573208e-07	4.394823704601832e-08
PI3K-Akt signaling pathway: TP53	2.1100001596143266e-07	1.2552734244038482e-07	9.07488999536604e-08	-1.071756084506814e-07	-8.815265990303396e-08	3.2568160839231306e-08	1.15411430551526e-06	-1.2356015957029592e-06	9.391839309351674e-08	-2.0530522713433468e-08	-9.98329540460438e-08	-2.830496290397417e-07	1.7456063111843737e-07	-5.010884332451213e-07	2.31579138521199e-06	-7.93579685658421e-08	8.481245298521219e-08	-2.8821474384625637e-08	-9.977803568243442e-08	1.232237808861002e-07	-9.387136642273078e-08	1.217184665116964e-07	-2.2359327399921922e-07	5.396476192089341e-07	2.0147826627636002e-07	-2.3702152753915474e-08	-6.264413744327878e-08	2.7290972597482977e-07	-1.7739805863812428e-08	2.632051827684429e-07	-1.330359622858186e-07	1.2150498527318398e-07	-1.3674780866647169e-06	-6.576886991766353e-08	1.6790446363894506e-08	-5.805707250434865e-07	9.687363518846018e-08	-1.631366287187104e-07	-1.1871974218786278e-06	2.1104147455524202e-07	-1.9962569379462042e-07	1.995840704649123e-07	1.2013543937539766e-07	-1.5316916070622408e-07	-5.8391287356113826e-09	-1.045950940758369e-07	1.460248043647526e-08	1.6040209030809745e-07	8.140973188391942e-08
PI3K-Akt signaling pathway: BCL2L1*	-2.984300309350897e-07	4.6963454710755663e-08	1.1835776544394938e-07	7.428469617523726e-08	6.299441814674206e-08	4.9394134274388e-08	7.631016691827495e-07	1.583891711232738e-06	5.633274791181701e-08	-1.166540971261418e-08	7.363643657767724e-08	2.417919602131425e-07	-4.795708116864669e-07	1.7747564464665293e-07	1.9564345075256386e-07	6.40478624762765e-08	-4.441931183912271e-08	1.4289635483613898e-08	9.169509426268593e-08	2.649023418420517e-08	-6.326160969387577e-08	-4.25692759913536e-08	3.7703295508013044e-07	-3.796046930561324e-07	2.5839278240459816e-07	-2.8143048834742385e-08	-1.6381718966241585e-08	-3.07647169719142e-07	-2.251609506808576e-08	-4.6281267532473874e-08	-4.608888659814412e-08	-3.311000983436066e-07	9.6802964407828e-07	3.740839025493528e-08	-2.197650239585896e-08	-2.7016404156247824e-07	-3.442717024089987e-08	5.584274163218299e-07	2.1741113648511023e-06	4.986446112363264e-07	1.2467691171181514e-07	1.7153324016718302e-07	8.064935089051797e-08	2.049571222908136e-07	4.539014583953952e-09	-3.889565302019031e-08	-4.071780563885957e-09	-1.1503014990047213e-07	2.8493732710391343e-08
PI3K-Akt signaling pathway: MYB	-1.1382636912419857e-07	6.373713807190478e-08	8.794668463156087e-08	-6.543224301911325e-08	3.8063582353993487e-08	5.0843602709815344e-08	2.620595918917374e-06	-9.022264115606844e-07	1.249944626888396e-07	-2.5642871186051427e-08	-4.7314039654221235e-08	1.0968615931275867e-07	-2.072475658112862e-07	4.2511981925958253e-07	2.109812160177224e-06	1.9274722225322662e-08	-2.949556797105199e-08	-1.277023566330059e-08	-5.644811932375537e-08	-6.275503136497718e-08	-9.99338691490491e-08	-5.9561612280349545e-08	-2.323026972762164e-07	3.137542279054456e-07	3.189696976309349e-07	-2.16866808277909e-08	2.2345054204410094e-08	-6.950342021274684e-08	-5.6558389617542186e-08	4.395567502584053e-08	-1.727786182838881e-07	-2.2905765758233437e-07	1.2294259221210112e-06	4.4964094263757896e-08	-2.3877075080589563e-08	-1.102243169147845e-06	4.3159593632663364e-08	2.244835620865601e-07	1.4584018557916757e-06	3.549315940669128e-07	7.422649507746299e-08	-4.4211082382368914e-08	-4.6867103493423686e-08	5.381421704678378e-08	4.2701792326168e-09	-6.54208777892671e-08	6.501371271524087e-09	-2.568203518964096e-07	2.5891427529235113e-08
PI3K-Akt signaling pathway: CCND1 CDK2	-4.088122384555225e-09	5.378327027803158e-10	1.8681797703773363e-09	-1.2338471843071792e-09	7.657333552283268e-10	1.1126871462988018e-09	7.477961960186603e-09	1.7071472219559198e-08	1.646280165537036e-09	-4.206680151496583e-10	1.456933131666245e-09	6.3496829376822645e-09	-8.255537687246163e-09	4.0732446853957356e-09	-6.363852970770512e-09	6.448165933343941e-10	-6.43712225549706e-10	6.261479116272311e-10	8.932422873723348e-10	1.1332514862549263e-09	1.2555156650687251e-09	-9.174092345302037e-10	1.8449081652794981e-09	1.6138941363775895e-09	-1.977303569566926e-09	1.8880675489745223e-10	6.063836583111166e-10	-6.896631123218979e-09	-9.171222984899497e-10	-8.720422496218454e-10	-7.201282219289945e-10	-1.5698243120575682e-09	1.9118596946692373e-08	6.846793777274988e-10	-1.6812274161428018e-10	4.102106160010075e-09	-8.163577713867684e-10	6.883333314985145e-09	2.2653891479619887e-08	4.956892921708299e-09	2.135396752130118e-09	1.1141911535279907e-09	1.1701130041960754e-09	-1.93970279689269e-09	-8.773168657130277e-11	-1.4069439227610656e-09	1.1126021080465813e-10	-1.8411664063793054e-09	4.892658351657713e-10
PI3K-Akt signaling pathway: MAPK1	2.011635826191524e-09	4.959649730416604e-10	7.810948034935484e-10	6.980815992668125e-10	1.5788947974937532e-09	6.099940653383638e-10	5.207328366750872e-09	1.732823510148832e-08	-1.688024140951358e-09	-4.0791459398893066e-10	1.1530712341067103e-09	-4.201532443962682e-09	5.984880588968811e-09	6.4937926025820494e-09	1.2446379217571293e-08	-1.4565058757784147e-09	9.639032901481136e-10	-2.952270863838687e-10	-4.1815231828715534e-10	7.665679002260692e-10	-1.9043893902173904e-09	-1.2238592352628014e-09	2.9121387678709892e-09	3.936863850777153e-09	3.384635972857548e-09	-2.723116478511261e-10	-9.969046274990338e-10	8.156333689063277e-09	-1.97559742190264e-10	1.4152864146366835e-09	9.276652565950019e-10	-2.909664757273731e-09	-9.190305432302245e-09	-1.5654147000254148e-10	-1.353057720783663e-10	1.2222169352279518e-08	1.0929242332682682e-09	8.39875482492848e-09	1.1345197334976173e-08	5.402692298901991e-09	1.3798609245470095e-09	7.971248601975195e-10	1.9583443952976075e-09	7.0329192634694715e-09	-1.4929873203452518e-10	1.0850230265555843e-09	-2.0270861590733857e-10	-1.5883357464591661e-09	8.796145844152903e-10
PI3K-Akt signaling pathway: BCL2	-5.958834871207104e-07	1.4857438077324488e-07	3.078805953239361e-07	-1.700010251905652e-07	8.382038682070032e-08	1.1212525040515349e-07	-7.910602692672747e-07	3.414002231653471e-06	2.648537871900243e-07	-5.3395621913509614e-08	2.033858582470803e-07	5.882782541181328e-07	-8.293776857034838e-07	4.671603383363192e-07	-1.4174789348714815e-06	2.501062961847359e-07	-8.177293940138814e-08	2.1876624419810152e-08	2.227971379858021e-07	1.696825616761649e-07	9.97065724280593e-08	9.231140295973553e-08	8.114303955495422e-07	-8.607739997436767e-07	2.3165212135872447e-07	-2.9468701914702705e-08	4.749587434883909e-08	-7.487519394314458e-07	-1.655187848806167e-07	-8.35569812317092e-08	2.1653575959404665e-07	-5.219124790385075e-07	1.097496316902464e-06	-2.8591460320914485e-08	-7.781474069462756e-08	-5.847862492866456e-07	-1.877992505742319e-07	1.2930449769350785e-06	5.809727154052418e-06	7.884512079127191e-07	2.5647483723085665e-07	3.649146571139514e-07	1.952434479289501e-07	5.04818973715968e-07	-1.1820494877990817e-08	-1.6460983821170168e-07	-1.239829627560798e-08	-2.658670773130317e-07	1.0287043969630904e-07
PI3K-Akt signaling pathway: MCL1	-7.788013871376162e-07	1.6122886417300193e-07	3.36560970833519e-07	1.8537077778092828e-07	-1.2455172698956768e-07	1.5960847443139714e-07	1.1296366063439692e-06	5.134557239582918e-06	1.5202782365459718e-07	7.808009560181685e-08	2.406497249335705e-07	8.072012612887122e-07	-1.5768698231194022e-06	-5.401729957642987e-07	-4.947449103292158e-07	1.676841568667758e-07	-1.1932188225610344e-07	3.663527524791251e-08	3.0676318425799346e-07	6.900135018943575e-08	-1.340289996619938e-07	-1.2759850122906642e-07	1.0636827766528969e-06	-1.359190843057901e-06	5.918342991049438e-07	-4.2081655341166506e-08	1.0159263453118873e-07	-1.1251872086869795e-06	4.4779567082519365e-08	-9.624899993029085e-08	-1.075440468996635e-07	-1.0143472399559615e-06	2.5128075056295915e-06	9.266364853554785e-08	-2.874186173720844e-08	9.27398663738874e-07	-9.833645364802857e-08	1.596953231416325e-06	5.928537473566168e-06	1.3512660137928484e-06	2.839478995938293e-07	5.096420103102519e-07	3.0785756066935137e-07	6.313268034136868e-07	2.0112241303389893e-08	-1.4271994238427272e-07	6.444995712491516e-09	-3.057575945836596e-07	-8.496906380560946e-08
PI3K-Akt signaling pathway: RXRA	-2.983748102358021e-07	2.0939484122244095e-07	-3.077376404015961e-07	4.490481242272997e-07	-3.2863293597254725e-07	1.580756652324301e-07	4.496849233540069e-06	2.3199650544890005e-06	-1.5331859480286794e-07	1.7052210857923897e-07	1.9443979717307733e-07	-3.271494345050956e-07	-2.3686902056833586e-07	-4.539828690764873e-07	3.982250339309794e-06	-2.3940517811768986e-07	-1.460162155987062e-07	5.119933258395283e-08	1.1936127974977468e-07	1.2968117358745986e-07	-5.285855784461245e-07	-1.8139261023010145e-07	-4.3286791824034475e-07	6.64606721468261e-07	5.338775266017938e-07	-6.683612473990202e-08	-1.2257105518923336e-07	4.965336882780172e-07	2.2904156748643105e-07	2.849909099312841e-07	-4.891380612620561e-07	-4.652113957829906e-07	3.353970520772496e-06	2.795386165936841e-08	8.469086623831333e-08	-6.662891610633146e-07	1.6158576100953916e-07	2.50805047755752e-07	2.780687678406502e-06	9.722529669838716e-07	5.791896138531616e-07	1.3983926388969338e-07	2.1535576022149717e-07	2.454955890637221e-07	6.074522180077485e-08	-2.3033915543091733e-07	-2.696226393753072e-08	-7.275643882838744e-07	-9.334368551807385e-08
PI3K-Akt signaling pathway: BCL2**	-2.854973814484897e-07	2.2576762731830554e-07	2.4577465374627377e-07	-1.8697093669125387e-07	-1.4812866304965258e-07	2.0859117632986641e-07	9.313982925579196e-07	2.453393665777277e-06	2.69848882759404e-07	-8.274677196110742e-08	2.135259827384787e-07	3.043621888758024e-07	2.881962068308703e-07	3.2881833607170425e-07	7.593075307127988e-07	-4.0587156068133816e-08	9.50285641903098e-08	3.8160965303045696e-08	-1.2674743421160736e-07	-2.8017058531641705e-07	-3.270669878813207e-07	-1.1407863441884965e-07	-4.6061151498566803e-07	5.913927629811796e-07	-2.038659006840125e-07	4.1592143671156616e-08	-1.2732834842090145e-07	5.804611892434281e-07	-1.5379756749949806e-07	2.3392045070427625e-07	-1.6639791764112148e-07	2.481702144048652e-07	1.985042553499283e-06	-6.010602993857838e-08	-2.7404933743981312e-08	-1.120652402763256e-06	1.1956470777225118e-07	4.289764436695169e-07	1.7530057301959196e-06	-4.722037890377922e-07	3.536556643767687e-07	1.8551578577852965e-07	1.282877687617158e-07	3.03401752544816e-07	-2.98046664240492e-08	-2.0383056590393078e-07	-1.6870307156648222e-08	-8.948428754986867e-07	9.912385064372239e-08
PI3K-Akt signaling pathway: EIF4E	-7.854559301096822e-09	-3.993161496315155e-09	3.9040841694873215e-09	-5.388649414326735e-09	4.659401986414614e-09	-2.7403851408669086e-09	1.1865463015010105e-08	9.825512116848145e-08	2.4504536918870397e-09	-2.0025661113479436e-09	-4.844937435775554e-09	-1.1850995052122928e-08	1.5437035391614843e-08	1.1931047270221686e-08	-7.534906585867531e-09	4.760281487822764e-09	1.6758425517043482e-09	1.6713005004902527e-09	6.9576058605591105e-09	-2.4822250199612683e-09	6.470750520674502e-09	-3.889177790196943e-09	9.1982199456708e-09	1.0054966841446148e-08	-4.6713426760793075e-09	2.108229693619747e-09	-3.321188957734769e-09	6.6358371430200465e-09	-4.442030575953552e-09	-3.196195986766105e-09	3.998867092506232e-09	8.517505764034146e-09	2.6270329609785244e-08	1.6315270491552194e-09	-5.613741850823013e-09	4.658475675066202e-08	-5.125194150171461e-09	-1.6932300585446203e-08	5.6234776442624976e-08	-1.740150073919723e-08	-9.41483430418306e-09	4.389883451096268e-09	-6.832716326402788e-09	-1.6030374778106017e-08	7.235727016706402e-10	2.9696857201548907e-09	-2.2939442826536344e-10	-8.568383201068448e-09	1.7001123318377427e-09
PI3K-Akt signaling pathway: EIF4B	-8.481017066131231e-07	4.703840928683061e-07	6.779907504520607e-07	-3.163128414952144e-07	-4.5351909723938084e-07	1.0831353219260876e-07	3.529850360058124e-06	3.5108969354754063e-06	3.601494313697365e-07	-1.1138232875505178e-07	4.815772844948775e-07	7.961750991476235e-07	-1.1694425719553144e-06	1.295180562708304e-06	2.442415748642354e-06	3.199721979485115e-07	2.7304224318982056e-07	8.16958079271642e-08	-2.1355963260438885e-07	4.3220758705535806e-07	-6.258140449985126e-07	3.4739770509149373e-07	7.033066678673529e-07	-7.494063045472513e-07	1.5063804280330307e-06	-1.0019674204322644e-07	-3.790574005544117e-07	3.295711993836986e-07	-2.496447415611242e-07	3.784782914441318e-07	-2.397854749634056e-07	-1.500725890132487e-06	7.1728304191432905e-06	1.723708283772521e-07	-8.067922297572707e-08	-1.323417417883705e-06	2.082181507687917e-07	3.729520420057064e-06	9.19565660738294e-06	2.573710259679408e-06	-4.007512637861418e-07	6.410395458299174e-07	6.48404790254917e-07	2.2224768264525586e-06	-3.19127349863036e-08	-3.940423089730028e-07	-5.188636638082853e-08	-4.3243514823531444e-07	3.60632093390926e-07
PI3K-Akt signaling pathway: RPS6	-7.806981854630782e-07	5.073171955591275e-07	7.503089451770085e-07	-3.6705001022965803e-07	-5.615406239133104e-07	-1.3697603596776433e-07	6.340997828589809e-06	3.0353783932954142e-06	4.0356917468681325e-07	-1.1938845050641368e-07	5.038410936192869e-07	8.715551058215487e-07	-1.2211924901669893e-06	1.0861402268468965e-06	4.569628137505474e-06	3.922401856114544e-07	2.572964505555233e-07	1.153958645030272e-07	-2.846113006405572e-07	4.910991931688896e-07	-7.448186366566749e-07	4.4030157775914025e-07	5.763410547737246e-07	7.562223258196815e-07	1.940669037019636e-06	-9.51487127213012e-08	-3.994593803362309e-07	4.71310458166323e-07	-2.6759230446940175e-07	4.644645905266437e-07	-3.501300866535645e-07	-1.7428916719418609e-06	8.823758335241551e-06	1.7408395936126386e-07	-1.0917917947342372e-07	-2.163893340270291e-06	2.930495322629084e-07	4.625320085492596e-06	1.1429432811826757e-05	3.1222571612559497e-06	3.957986293941857e-07	8.522339763132675e-07	6.596145934526526e-07	2.2612174052996582e-06	-2.8729020484507645e-08	4.293466890877561e-07	-6.242731591422844e-08	-5.183277999264474e-07	4.178745133390803e-07
PI3K-Akt signaling pathway: NOS3	-8.797594634268385e-07	1.878264087052547e-07	2.853005789500071e-07	-3.853138302190278e-07	3.9328679020215124e-07	-2.7648286658053305e-07	-2.3871768449119805e-06	-1.6353739914251792e-06	1.2302977929819308e-07	-1.1370997264708594e-07	4.914714577748547e-07	1.216353979649003e-06	-2.576327113532733e-06	1.5353772438432883e-06	-2.7723204327279068e-06	5.424808302053183e-07	-2.0496597483062557e-07	2.7728237445548984e-07	2.2618691023524586e-07	5.618456664623329e-07	8.84143634349374e-07	2.953133286704049e-07	8.246504127447364e-07	1.119000094291694e-06	4.681295058818006e-07	-5.1297471861407845e-08	1.6160179677623338e-07	-1.8156147832345008e-06	-2.964441199663717e-07	-2.260096771616604e-07	3.731084078669213e-07	-4.08508114760611e-07	5.503892191519062e-06	5.459077385967585e-08	-2.0199150754655186e-07	-1.237763465699076e-06	-4.025620032047977e-07	1.770060508884907e-06	1.0615876915910902e-05	1.7919191041823778e-06	7.591177259369927e-07	1.7161469309025646e-07	4.391895601758516e-07	-3.954898228988542e-07	-4.17484110923672e-08	3.802069214751487e-07	1.9423627170699512e-08	9.56026536984622e-07	1.532829499544703e-07
PI3K-Akt signaling pathway: CASP9	1.3072644070884695e-06	-2.0634247833961595e-07	-4.410744172451934e-07	5.629699165869076e-07	2.737283472167581e-07	-4.124853125780089e-07	-5.33822694904289e-06	-6.6125393265481645e-06	-3.489697047577267e-07	3.5867604045318705e-08	-5.018562930748319e-07	-9.323482389128528e-07	1.6462476309167791e-06	1.147832291658748e-06	-3.446582853465054e-06	-8.118422974401028e-08	1.537670041074079e-07	-6.136245120506432e-08	-4.501239928915814e-07	-1.7608558299720133e-07	-3.1560706776479214e-07	1.6043045208507338e-07	-8.520354940993068e-07	8.386524661219895e-07	-1.506217811434866e-06	7.769644768282865e-08	1.0477630069885017e-07	7.529242700226011e-07	1.401930713720806e-07	-2.458676542970839e-07	2.250490437079843e-07	1.4362676784754394e-06	-3.3577619647908865e-06	-1.1669048056012748e-07	1.6485839253759844e-07	-1.2563415200419146e-06	1.652988762878187e-07	-1.9516331178426583e-06	-1.3215623626794547e-05	-2.016662469319573e-06	7.410140255915641e-07	-6.362936091841902e-07	-3.239727472619985e-07	-8.155646302425992e-07	-3.5019863146741706e-08	2.104653834677858e-07	-2.0881084364921977e-08	-4.174911196938241e-07	-1.591073477211907e-07
PI3K-Akt signaling pathway: PRKCA	1.650895523656215e-06	1.2355359671717698e-06	1.733786223806679e-06	-7.186530694685601e-07	-1.3503715327711103e-06	-8.243142497470398e-07	-1.4924536425696177e-05	1.6544125199813823e-05	-1.099419410711416e-06	1.5234686213929026e-07	7.423235032999196e-07	-2.7300545034992422e-06	1.8427331660812493e-06	4.20951070771553e-06	-8.625254485724865e-06	2.664568355054224e-07	8.584640186619896e-07	4.078383861189908e-07	-7.353413883691924e-07	3.1350531002705258e-06	-1.8375620052427744e-06	-1.0559756201816469e-06	-3.534568463995149e-06	5.564373044428291e-06	-3.039010634691506e-06	7.21923188928755e-07	-8.439224061890063e-07	4.781434642496524e-06	-3.200817489312625e-07	1.5033384104617889e-06	2.2815561592249226e-06	2.9621642624417797e-06	1.3711067594792591e-05	4.757182739630081e-07	-3.990322649521097e-07	-3.08830352326268e-06	6.73892604325993e-07	4.6050329120302585e-06	1.2910817941554458e-05	-3.907071438836462e-06	-1.6146347456595637e-06	2.3662901991560423e-06	1.2643184836306168e-06	4.1948964065658935e-06	-1.5076104031979916e-07	1.2651322457064913e-06	-1.253014419601117e-07	1.716911996176216e-06	6.975345932032951e-07
PI3K-Akt signaling pathway: PKN3	-1.132782704896677e-06	1.0696403082649015e-06	1.155268436628784e-06	-1.0268382311659195e-06	-9.62616602000701e-07	-3.252628289370309e-07	-1.4088951516296754e-05	1.247756392016968e-05	5.76536598747129e-07	-2.717987346748821e-07	1.028610059707441e-06	2.167082984429426e-06	-1.7812284309107194e-06	7.133829179083751e-06	-1.0982759017619333e-05	9.00932304723582e-07	5.452774046844091e-07	2.6040313003514737e-07	-3.854334712114963e-07	1.4413543947506053e-06	-1.662848798096135e-06	1.0193952108790789e-06	1.5478958170129511e-06	4.215406125581352e-06	1.964376491727713e-06	1.5955692020260282e-07	-8.245085423686189e-07	1.5072644411458451e-06	-8.239543358707866e-07	8.094518633572124e-07	1.4664075898488523e-06	-9.128911671750672e-07	2.4773952212509876e-05	7.51879629675059e-07	-4.855866865780822e-07	3.4258404336612154e-06	7.390742892260687e-07	5.384783744742158e-06	1.9798170361096648e-05	4.243006838405859e-06	2.112301161693763e-06	1.5301202895971711e-06	1.2037372638460224e-06	2.5923924248217943e-06	-8.941431455492021e-08	1.0575785296991554e-06	-8.836107122435818e-08	-1.1551382600823505e-06	7.847893071131983e-07
PI3K-Akt signaling pathway: C8orf44-SGK3	1.4707350952981491e-06	1.0454477646863724e-06	9.800749897919044e-07	-8.660823120050057e-07	-8.820327196149356e-07	-8.60450326509458e-07	-2.5324994188192995e-06	-2.4185883767469853e-05	-1.0518285545038568e-06	1.79192225191506e-07	1.0568867343534854e-06	1.875315424448312e-06	-1.779722381262638e-06	4.307465529608499e-06	2.297119615058389e-06	4.774493602920442e-07	7.988230495451991e-07	3.624087470487961e-07	-1.0070132303407713e-06	1.933751393525372e-06	-2.3058628247925603e-06	1.2772409762172508e-06	1.562651972108386e-06	3.9631214214043065e-06	1.7991308478166237e-06	-3.426879555810125e-07	-1.0020381080686485e-06	3.993382566998751e-06	-1.374864506890046e-07	8.427312266193539e-07	5.495587887910175e-07	-2.391613221817759e-06	2.1126477312371144e-05	8.14214326234803e-07	-1.6477429411652878e-07	-1.7513250805403027e-05	1.0648262066660296e-06	3.903135314208402e-06	1.1510893371816028e-05	4.458738498035658e-06	1.3794075182694673e-06	1.9992564829952705e-06	1.4262783277057375e-06	3.722856413992395e-06	-7.184481352668506e-08	1.397978355015427e-06	-9.432051808771557e-08	1.5005463197609605e-06	7.888155540780684e-07
Apoptosis: BCL2*	-5.600923964415204e-08	3.760860165215264e-08	2.5460609919808387e-08	4.1882592500775647e-08	6.200974095519358e-08	-2.4144772346249482e-08	-1.338896138428908e-06	8.617113861409464e-07	-2.727534155406844e-08	-1.8516156280169933e-08	1.0180910100323189e-07	1.7370641326448193e-07	-2.995497258448736e-07	5.540158096057248e-07	-1.0221592402524024e-06	5.290362076056612e-08	2.3970473458768924e-08	2.263923309881703e-08	-4.341434341254643e-08	2.826011573075656e-08	-6.81593895875716e-08	8.158128279904813e-08	2.4514267146136845e-07	4.754974591850994e-07	-8.424898936123345e-08	1.607760421975334e-08	-2.472730079338025e-08	-1.0635184359716312e-07	-3.286465755942004e-08	6.168741935491603e-08	1.476470164345189e-07	1.271282242615863e-07	-5.82814294910912e-07	-1.6548574768744125e-08	-4.847536158320291e-08	1.0714509875816918e-06	-8.28581830538882e-08	2.0500235321995157e-07	1.3236217539671585e-06	1.9213784317991087e-07	1.2486402482348165e-07	-1.1396111565824429e-07	6.238227664912516e-08	5.5140646543922826e-08	-4.8744539880778875e-09	8.476749857100279e-08	-2.810248837266714e-09	2.077910264619928e-07	2.6318692381439318e-08
Longevity regulating pathway - mammal: SOD2	-2.0472224868380565e-05	1.0285213294146596e-05	7.525993487660153e-06	5.707661032605596e-06	-1.534769788271072e-05	4.436820878738123e-06	-6.446830270326438e-05	0.0001195060024022	-9.649573942641552e-06	3.760702873296932e-06	1.564894945335784e-05	1.7243952103391686e-05	-2.091080013529372e-05	1.2694745411646432e-05	-6.0616368867845526e-05	-2.006376099960573e-06	-4.597278610402925e-06	-2.5941263890242097e-06	3.2230537633907263e-06	8.382617001648248e-06	-1.0877654235148742e-05	-3.968453832703906e-06	1.3200512075731508e-05	-2.5676985862512854e-05	1.9301928780853337e-05	-6.229189626258366e-06	-5.795603587067647e-06	7.533501078109124e-06	4.970404965564792e-06	7.699355920126857e-06	7.632855957800851e-06	-2.8675784113622724e-05	-2.431071395322845e-05	1.8496552321087528e-06	1.694716850490264e-06	3.318973101853422e-05	-5.758681311498415e-06	3.330484859918396e-05	0.0001589535814123	3.596914300154518e-05	7.85569748114704e-06	4.241779266247233e-06	1.15211394738322e-05	3.658210301885251e-05	6.568188304178196e-07	-1.5527883131605956e-05	-6.612225876627818e-07	1.9128878906776023e-05	-4.356637939291236e-06
Longevity regulating pathway - mammal: CAT	-1.2821356201663744e-05	8.762233170489705e-06	6.0662925662541e-06	9.609796153038724e-06	-7.196534679125871e-06	-3.6294786966027545e-06	-7.855441798208905e-05	3.448300870755738e-05	-7.780256186005474e-06	4.006516506041346e-06	1.4258493820053012e-05	2.1049671832896615e-05	-1.3601121056189437e-05	-1.2254493749720453e-05	-4.781636564380751e-05	1.6243113045415816e-06	-3.5608951911287296e-06	-1.3805126202788536e-06	3.93491809665786e-06	6.735912116503651e-06	-9.341349941203516e-06	-6.209110662358041e-06	1.511609843072274e-05	-1.5806951957925354e-05	2.2596585074449675e-05	-3.2255880650504026e-06	4.928744716724163e-06	6.287875923259537e-06	6.007286003220184e-06	7.42667645391778e-06	8.5997067572179e-06	-2.7496916252480448e-05	-1.1115444958208164e-05	8.358816704128566e-07	9.37510197478942e-07	-3.169904287161509e-05	-4.0696968982744376e-06	3.5473167099578034e-05	0.0001400275483477	3.52682788919785e-05	1.0780646958217355e-05	6.387198957864788e-06	1.0909601711139432e-05	3.546966851338203e-05	3.8880655249153516e-07	-8.925618099007176e-06	-6.766467230366838e-07	1.1830655077244782e-05	5.099418666507228e-06
Longevity regulating pathway - mammal: ATG5	-1.0798879826192017e-05	4.244086192730313e-06	6.183521451026311e-06	-1.842475893429688e-06	-5.848168076014239e-06	2.3410112684739542e-06	-4.785445065701731e-05	0.0001099533589189	-3.918421469841357e-06	7.259903245522613e-07	7.5741279935388445e-06	1.2805205898097898e-05	-1.08876276297316e-05	-8.403989228698453e-06	-3.56809127727968e-05	8.613124321051162e-07	-1.5714196233297485e-06	-6.914207177467624e-07	5.034924757377954e-06	-5.681424612818576e-06	-2.476419163078615e-06	-3.454561847038408e-06	1.8000899783897178e-05	-2.743216313932417e-05	7.106414344990494e-06	-1.8468616143956228e-06	-2.9272533218903247e-06	3.625716026499325e-06	8.095643223999228e-07	2.452204485150016e-06	4.709029118472038e-06	-1.7046666717756303e-05	-2.102578427404689e-05	4.169769425103824e-07	8.761709122538685e-07	2.721805694834547e-05	-2.5709491443911346e-06	1.810405810472146e-05	7.354257850986974e-05	1.734250807573974e-05	6.016344644832834e-06	7.870780515172977e-06	6.756316880502749e-06	2.122042275515951e-05	-4.1894832027303e-07	-6.324368969211748e-06	-3.675543987334129e-07	8.733563073214053e-06	2.3760089734927246e-06
Longevity regulating pathway - mammal: EIF4E	3.230793937315072e-06	-1.0946922001768958e-06	6.204514543091685e-07	-1.5894307716621673e-06	9.586715712339625e-07	-7.348479697407283e-07	5.00752947104763e-06	5.45176213223075e-06	-7.580968815697438e-07	-4.87096475422878e-07	-1.5360842072527805e-06	-5.292167712172396e-06	6.297121481492997e-06	2.3005131888297846e-06	4.196223910859299e-06	4.7281037934290986e-07	7.003681490179166e-07	2.628898087301349e-07	1.1583682380905626e-06	-8.391606913063035e-07	1.7362407349402588e-06	-9.586423860184442e-07	1.2345950434052368e-06	-2.242534474178461e-06	-2.077210128457836e-06	6.922797929534365e-07	-6.252038723302948e-07	2.7834838808182915e-06	-1.0920488859159622e-06	-7.93339995378161e-07	-8.993972975336309e-07	4.119596532518861e-06	2.965146271007148e-06	1.0160698188538021e-07	-1.1681172081438264e-06	-3.4435876647961463e-06	-1.2572362649292947e-06	-9.498287428875088e-06	-1.385402818993194e-05	-7.250001910731929e-06	-3.6376654037455058e-06	-8.006072701692153e-07	-2.093595620344898e-06	-5.650228506043796e-06	1.504094788196385e-07	9.497306640147046e-07	1.1433520220817297e-07	-2.184386185107684e-06	4.901275623962343e-07
Longevity regulating pathway - mammal: RPS6KB1	-1.6342773718482374e-06	-9.04094208398394e-07	2.3317240291402465e-06	-1.3417808730578176e-06	-1.7286783454023485e-06	1.1580526402271712e-06	7.170023672232589e-05	-1.0879653073685588e-05	8.423356419009932e-07	-5.044144693854511e-07	-1.750762912774718e-06	-7.120674974312423e-06	-3.167817245513296e-06	-8.061697764790002e-06	5.149785206628936e-05	-7.516594973244358e-07	8.831633618646034e-07	-3.3369680359833457e-07	1.1795614830893228e-06	-1.0004195804552123e-06	1.7085915947774422e-06	-8.425177532513077e-07	-2.521793346960529e-06	-3.397609849834933e-06	1.001455483794504e-05	-2.980472913408228e-07	-9.104719885320451e-07	-3.981710043980513e-06	1.926858160328427e-07	1.2301658385345973e-06	-5.14221892098166e-06	-4.6922624340342894e-06	-5.385193120242004e-06	-6.613199695654153e-07	1.807724557038859e-07	-1.390227322707176e-05	1.0046437084642368e-06	7.85429446869603e-06	1.977442676386752e-05	1.2225238825802314e-05	-2.3771874222378763e-06	-1.883344831636057e-06	1.3074381065876049e-06	4.4602694920994495e-06	1.1801378658990881e-07	-2.434314124017886e-06	2.238450543564707e-07	-2.2772746822815733e-06	-1.266796351502274e-06
Longevity regulating pathway - mammal: ULK3 RB1CC1 ATG13 ATG101	-3.357771817202889e-06	1.028968996418811e-06	-1.113309750222255e-06	1.568788956227844e-06	1.8150384938591495e-06	8.962246590214564e-07	-4.960456611256056e-06	2.054974003668516e-05	9.972452083341408e-07	-3.6677985565707306e-07	1.6959803242422835e-06	3.66137940774258e-06	-6.217109929182317e-06	8.108308211384282e-06	-3.33068313829315e-06	-6.760754681620924e-07	7.986743613989042e-07	-3.337550266470835e-07	9.475043633126684e-07	9.91657346670622e-07	-2.065162381738269e-06	-9.810355680951308e-07	5.778125243025817e-06	-4.823813062601371e-06	2.4366166584055447e-06	-8.311742837939287e-07	-1.3925942652703076e-06	-1.7454634155157355e-06	4.681883921771437e-07	-1.1923463964469437e-06	1.5415043359867596e-06	-6.278380143865929e-06	-5.789729314671159e-06	6.930115543924846e-07	2.268594861518559e-07	2.2656250403744704e-05	1.7545459341790372e-06	7.477209409567661e-06	1.7485350066732613e-05	7.050621769384743e-06	2.3985460081741343e-06	1.8775569616213536e-06	3.007757092578066e-06	3.808631042792853e-06	-1.5194257192692693e-07	-1.505436621968164e-06	1.7016414154051298e-07	2.141328336475752e-06	8.311818674204987e-07
Longevity regulating pathway - mammal: EHMT2	-2.9566849270874318e-08	7.1270151448063445e-09	1.2084742342801845e-08	9.18305694789316e-09	1.4613096671918864e-08	-1.0728823883528905e-08	-1.8286481439179186e-07	3.081100294264289e-07	8.542311289703338e-09	1.5580646382342915e-08	2.5529140600970652e-08	4.6941384600575006e-08	-3.119629843502152e-08	-4.856522776010236e-08	-1.7980355006226806e-07	3.079768213861115e-08	8.335309924200341e-09	-2.808352642191233e-09	2.6268815712513103e-08	1.2306558353541122e-08	1.936723980947736e-08	1.2793706251743204e-08	5.97113674493899e-08	-9.93787269058867e-08	1.9754450190609264e-08	-7.573865983423222e-09	-8.949620792958172e-09	-2.2877791906877192e-08	1.7211910142219753e-08	1.2360814958745592e-08	1.7036315714699315e-08	-6.157099230164368e-08	1.7258736285235522e-07	-5.395722536783469e-09	5.847755684099743e-09	1.8028071737767762e-07	-1.514127153748524e-08	5.880098456062912e-08	1.1993817305042116e-07	6.570612463328764e-08	-2.4089044476812143e-08	1.567255155720725e-08	-1.7053297562230833e-08	3.4999448724628976e-08	2.341577266656266e-09	-9.748712976543338e-09	-1.3445209886538466e-09	6.438168381456926e-08	-8.539809212994274e-09
Hedgehog signaling pathway: GLI1*	5.397967059085162e-07	2.619608887998088e-07	-8.838552731427975e-07	2.2801116341374994e-07	2.551420709771068e-07	-1.742201540739261e-07	3.7298897929093342e-06	-1.4013740516417894e-05	-1.357170238876685e-07	-1.267989809488448e-07	-3.500262323722337e-07	-4.626180878565744e-07	3.595355731069603e-07	1.3303801762343536e-06	4.002201099513387e-06	1.917195399791054e-07	-2.3342140663522267e-07	-7.240287917400897e-08	-2.0513972602423042e-07	6.568321304809666e-07	2.890236095070501e-07	2.159145285751072e-07	8.333056894962182e-07	8.298466884192606e-07	5.19396864820627e-07	-1.6946289160402294e-07	1.362530440453363e-07	-3.263507802717474e-07	-8.170706021588866e-08	-2.298257839248261e-07	-7.029853142047398e-07	-6.459289674432526e-07	2.417247339307925e-06	8.84960313643691e-08	-5.620319242204436e-08	-3.940977860375356e-06	2.5142335623947454e-07	-1.4749405555944834e-06	-2.775934752972775e-06	6.354353242815293e-07	3.854757475281521e-07	-2.795141603657787e-07	-4.367810118957012e-07	-6.633046220889814e-07	-3.116705768578299e-08	-2.827177743490421e-07	5.9358307929719195e-08	-3.7614600270016913e-07	-1.661960289532861e-07
Hedgehog signaling pathway: PTCH1	1.1074431372204012e-06	-8.122631517904152e-07	-1.7781836214623427e-06	-4.778680814016594e-07	5.280851692952041e-07	-3.447620032249697e-07	-2.7589734965777846e-06	-2.2612975716450123e-05	4.294970049084355e-07	2.2726812290122938e-07	-5.647077095567162e-07	1.6514379805960786e-06	1.851451176278944e-06	1.0157082288451916e-06	-4.567096305651663e-06	3.2507250408879575e-07	4.159224157806104e-07	8.80582458754044e-08	-4.970499739155385e-07	-1.4329748641576525e-06	5.476046324509544e-07	5.664040328430244e-07	-1.1603039319222242e-06	-3.1799483242116483e-06	-2.580280518068074e-06	-1.532951992265666e-07	2.842529847690561e-07	8.166532058840244e-07	5.409514190050143e-07	-1.3009913017237706e-06	-7.396538166373782e-07	1.1287246638375196e-06	4.485145680040722e-06	7.109194709563332e-08	3.638711678614271e-07	-5.2693581906876e-06	1.0550642936231198e-06	-5.266950152562765e-06	-2.475426783744327e-05	-2.8090588354467487e-06	8.606283586971459e-07	-9.29498021735916e-07	-8.581069978535167e-07	-1.6627448108925475e-06	4.2468391212026577e-08	-6.669616663263418e-07	2.8500041702888752e-08	-2.7896509872652237e-06	-5.766951965524696e-07
Hedgehog signaling pathway: HHIP	2.2350494867719112e-06	-1.0075196719413126e-06	-1.0731167163169303e-06	4.778800623733396e-07	6.061738168955351e-07	-7.930827961489647e-07	-1.3842027139697454e-05	-1.9822446692675857e-05	-1.006897388665175e-06	8.212622921250981e-07	-8.124904380194564e-07	3.5710556427668336e-06	5.158516839642979e-06	1.5643667222932786e-06	-1.2823438687474224e-05	-1.986605689940034e-07	6.00206943057099e-07	2.879321290093361e-07	-9.79415111195686e-07	3.63973914694748e-07	-7.764087808818283e-07	4.673664877039653e-07	1.429972393646726e-06	-3.754413409482865e-06	-4.617262000843215e-06	1.740994480242625e-07	-4.750542365002769e-07	5.49525500095575e-06	1.3803787659476504e-06	-1.7745625972263925e-06	8.534113355636503e-07	1.444356458840842e-06	4.6978028750440776e-06	4.78967919804018e-07	3.076657006576688e-07	-8.885974476656537e-06	1.4667389809532638e-06	-5.622141847022234e-06	-3.1203132879847966e-05	-4.8771299312585845e-06	7.083752315101251e-07	8.643405979009016e-07	-1.07228849387845e-06	-5.635867095504127e-07	1.6941044529092628e-07	9.913553298943404e-07	-1.5138565318811634e-07	-1.799709121590917e-06	-8.449134677226707e-07
Hedgehog signaling pathway: CCND1	1.2498402274631796e-06	-8.890620106763425e-07	-2.3497333992483397e-06	7.097055590649545e-07	3.3175141986167015e-07	-4.1823837942137196e-07	3.953013703203488e-06	-2.415562891555932e-05	8.336416886477548e-07	5.060836679982124e-07	-8.427770786468314e-07	-1.790258080518908e-06	9.416634589625104e-07	-1.7032159952378233e-06	-3.846979968002132e-06	3.477513776126095e-07	5.048697385395767e-07	1.6070629642396304e-07	5.281226008793006e-07	-9.810093335929727e-07	-6.248583231775679e-07	4.817021635975203e-07	-1.8298235404477116e-06	-3.4404883367584727e-06	-1.2211401247065812e-06	-2.084400872239758e-07	-4.475273406616674e-07	6.305977006360235e-07	1.0130953826144232e-06	-1.4625574439606506e-06	-1.531879632796586e-06	-1.9277769723937275e-06	6.739588971827739e-06	9.146281162542323e-08	3.382402654376861e-07	2.6552526499126038e-06	9.758027062236e-07	-1.253952198569566e-06	-2.4293095201432064e-05	-2.3899488160654166e-06	1.5986951113369071e-06	5.519798659546881e-07	-6.347239991454854e-07	1.5417007165994374e-06	1.1800050308355283e-07	-1.020726334214502e-06	-6.345647648040809e-08	-3.4597979272157237e-06	-5.167664575948858e-07
Hedgehog signaling pathway: BCL2	-1.0545186151882595e-06	-4.373388411292968e-07	-1.5758279821923448e-06	-4.7124280838756405e-07	1.0202578153894104e-06	-7.924625364616004e-07	-2.518776694309976e-06	-1.937543352601089e-05	1.083924750034746e-06	6.833338770863607e-08	-7.334727097912886e-07	-1.297023788648635e-06	1.4594040784915048e-06	1.5227786157516906e-06	-4.464727092575753e-06	6.204289750018387e-07	5.21031011805574e-07	-1.5380560054777438e-07	-5.387405709081758e-07	-1.069417769125078e-06	-8.120301447377629e-07	4.595717258108662e-07	-1.969200944951425e-06	-3.202791332481652e-06	-1.4461776351576242e-06	-2.267129504538344e-07	-3.1734705755562776e-07	8.60776498591001e-07	2.1622803043411963e-07	-7.707500936815968e-07	6.402497944758808e-07	-1.1576932409152576e-06	7.011082012520915e-06	-1.8979460227933307e-07	8.52604410364115e-08	-4.76291736872721e-06	6.291944846863334e-07	-1.5416576610417886e-06	-1.2263554347294618e-05	-2.064615216412904e-06	1.2486508925410018e-06	4.549404915520142e-07	-8.100252821547898e-07	8.90345756913526e-07	4.6965665640807583e-08	-1.4517206499499536e-06	-5.660404535078741e-08	-4.035072735648305e-06	-3.591099226421916e-07
Hedgehog signaling pathway: GLI1 SUFU*	1.5157530953337577e-05	2.331265748471377e-05	2.8858507732301183e-05	-2.245791471578085e-05	-1.121525532584968e-05	7.995796607094554e-06	0.0001099951014626	0.0002606910412463	-5.23867306266626e-06	-1.107455179502462e-05	9.574325878646852e-06	-2.5364496780245812e-05	1.4466375984191252e-05	-3.6999296457317424e-05	0.0001798435101912	-2.987978905714768e-06	-9.520985005754762e-06	4.361889666662957e-06	1.1172403157128422e-05	4.178342959444603e-05	2.0636343402737527e-05	-6.1614307614601135e-06	3.3663337684796114e-05	8.469318471061387e-05	4.072977730123974e-05	3.3243710449782577e-06	-7.591343195029558e-06	-1.6491234512939712e-05	-2.299969230807445e-05	3.232561436369201e-05	1.3717507659976696e-05	2.1132979798593652e-05	-0.0001171273226882	2.025139396719534e-06	-5.80006484947562e-06	4.19998954121467e-05	-1.8283820514779944e-05	6.986402043085495e-05	0.000506611453973	4.957951144605171e-05	-3.709313905000785e-05	7.729183980872438e-06	1.4066371846489354e-05	1.5283088041415754e-05	-3.4033665374668324e-06	2.227951659662213e-05	2.349759144740174e-06	7.456039242779967e-05	1.3982830527232134e-05
Hedgehog signaling pathway: SUFU	-1.5592513734100753e-06	2.323987686785436e-06	3.580510193572229e-06	-1.9012499259484044e-06	-1.4959191127392262e-06	1.1492162487123075e-06	7.040394729509633e-06	3.723622765684592e-05	-7.608667413508032e-07	-1.2347445982656162e-06	1.139423063855461e-06	-3.38054835271116e-06	-2.195565809919915e-06	-3.5894387724904765e-06	9.9124204637036e-06	-8.534462287605602e-07	-1.1866956478211417e-06	6.129134179544038e-07	1.140712898322135e-06	3.73556648174364e-06	2.934614454601871e-06	-1.147330562177494e-06	4.481108218856888e-06	9.51256949536359e-06	3.483465039565214e-06	5.204362040584294e-07	9.746218642224044e-07	-2.7742445864911904e-06	-2.5516734947163263e-06	3.361967514874e-06	2.519046688201524e-06	3.918852040187828e-06	-2.0027927351349326e-05	-5.393683781995977e-07	-9.550597601701567e-07	7.310554216061945e-06	-2.9683156746260394e-06	8.051929722354996e-06	5.6570667406216815e-05	4.985311343478496e-06	-4.318002152703608e-06	1.3170616202884026e-06	1.788734020331122e-06	-1.1434634359716656e-06	-3.518226547535608e-07	2.819844700192357e-06	2.249073006072535e-07	1.0815530166666066e-05	1.657915262725549e-06
Axon guidance: MAPK1*	-2.554173634886389e-06	-6.468879351154509e-07	-1.226977767681279e-06	1.043197058089201e-06	9.253081390649412e-07	1.5593023100812016e-06	-1.7536129732574455e-05	7.968186226429946e-06	1.4407236531782758e-06	-1.961169229372705e-07	-1.5666414724948812e-06	-4.488970203051047e-06	7.183329096959621e-06	5.440235766742555e-06	-1.1266199400645049e-05	-2.581420978910509e-07	6.622647776356581e-07	-5.944943648649619e-07	-2.1595738721973525e-06	-2.641159070099616e-06	-4.531107081638685e-06	-8.098223909838534e-07	-4.390274000848855e-06	-2.742076657575134e-06	-4.118658678960824e-06	-3.084758614949079e-07	-7.493242634743459e-07	4.7022910759120815e-06	5.837609979260732e-07	1.5677016074548394e-06	1.518761950446305e-06	1.625967900836004e-06	8.829145745531371e-06	2.752439207736045e-07	2.392467383807625e-07	5.902978050501889e-06	1.3986707501791528e-06	-1.6922039644660795e-06	-3.49768749580784e-05	-5.89545884422623e-06	-2.761300910088691e-06	9.810955089203358e-07	1.159495851097565e-06	1.2164369266013208e-06	1.1764096370961621e-07	-2.5667000445985826e-06	-2.5122836638597773e-07	-8.379506205779222e-06	7.666479779635903e-07
Axon guidance: CFL1	-9.444777946232092e-07	-6.201511410506068e-07	-6.252669853070947e-07	7.403622659224386e-07	6.387791862169169e-07	-7.689169452616448e-07	-2.753476771053351e-05	1.8555412935855243e-05	1.220960154008926e-06	3.920582221980178e-07	1.0835009273779698e-06	2.28370841392117e-06	1.6515030099751518e-06	5.886771854674463e-06	-2.130992245447684e-05	6.800749066759167e-07	7.549707299699564e-07	-2.743132340445107e-07	-1.5653586985183109e-06	-1.3541011284308293e-06	-2.6144934188143177e-06	1.1609766422163324e-06	3.482522200846305e-06	-3.180623508140902e-06	-4.440229250446618e-06	3.939036831122122e-07	3.499145426932088e-07	1.2804209844950528e-06	4.630017507969814e-07	-1.280476756555046e-06	2.130955427343921e-06	2.2019049429162664e-06	-1.0890054007961984e-05	-3.98782823235855e-07	-1.4418727198353934e-07	1.357023512111191e-05	-4.4797976015270214e-07	-6.230537757879606e-06	-2.5939826959601146e-05	-5.425325601445856e-06	-1.7864223175935106e-06	-1.0912190801633776e-06	-9.01597919663154e-07	-3.116085461850703e-06	-1.6873030387128667e-07	-9.668240661156385e-07	7.56593369920314e-08	-4.5271622656023525e-06	-4.321414598706693e-07
Axon guidance: PAK4	-9.199716025870293e-08	3.7168231228620654e-08	-6.635134893814791e-08	4.455706933417319e-08	-4.733646519643498e-08	5.1815007910721953e-08	-2.0178619636589237e-07	7.22207080631461e-07	7.055051879161075e-08	-5.2512906635092246e-08	-5.2580067644337715e-08	8.050345979948008e-08	-7.805511861867878e-08	1.4012967012146825e-07	-1.7420511746768029e-07	-3.0671219727173455e-08	-4.4240964965787794e-08	-1.801300818662207e-08	-3.49908252635638e-08	-8.249488784489944e-08	-1.4468034392343362e-07	-5.4296069149449465e-08	-2.6152195807058896e-07	-3.2180332717919134e-07	7.185942171479947e-08	-1.2253951554932904e-08	4.0290177188963494e-08	-8.374575275683238e-08	-5.587973141717842e-08	-5.100542419252869e-08	2.8610222448079484e-08	1.220936511887199e-07	-2.598384747453412e-07	-1.5764275108052128e-08	-3.2847521628870274e-09	3.717880681489495e-07	-5.5836171083255844e-08	-4.519366990279142e-07	-1.0760479113953154e-06	-1.2826980280863474e-07	-1.7367271838071797e-07	-9.994956933103959e-08	7.622463295824588e-08	-3.742390501065239e-07	-8.456443501216174e-09	-7.064195736934564e-08	9.683666253349029e-09	-2.551285590060799e-07	3.2361816609510526e-08
Axon guidance: RAF1	3.2054939648885077e-06	1.5991962740521087e-06	3.7162927552644017e-06	4.871503153020635e-06	2.555813906396454e-06	-1.872415957575484e-06	1.2142879293293402e-05	3.728378739619228e-05	1.9779338241640885e-06	2.685675057328963e-06	-2.474324945507339e-06	-8.418026119644736e-06	5.671034469032433e-06	6.284367849119723e-06	1.211916659142011e-05	3.2383302339150987e-06	2.222080894453505e-06	-1.2545436382365578e-06	1.950690519255093e-06	1.2027847359676824e-06	-3.064718500261626e-06	2.065944701016215e-06	-3.26017928595726e-06	7.98070821421926e-06	5.862499719975128e-06	-5.363835105059139e-07	-3.559705791381649e-06	1.215511899760546e-05	3.482428922651103e-06	3.2336900777811947e-06	-2.517669811045061e-06	-8.122733984717172e-06	2.118027764045824e-05	1.641072867058883e-06	-1.1235302779305597e-06	1.345521767732998e-05	3.106563574182226e-06	2.596051466026764e-05	5.355589621653617e-05	1.0316499471285689e-05	8.616549167845898e-06	2.598326750831633e-06	5.100375265136636e-06	1.7318739470867676e-05	7.201705400243504e-07	3.567722309284745e-06	-7.150229164953264e-07	-6.70215259160629e-06	-1.550470458542183e-06
Axon guidance: CFL1*	-2.8603398458496896e-06	-6.961861584433152e-07	-1.141095014909923e-06	1.83543061579472e-06	2.2738782419130957e-06	1.037355377986242e-06	-1.9047122176605664e-05	2.097225971003729e-05	6.13873156075326e-07	9.596232594376618e-07	1.7763354225696328e-06	2.5590873971825497e-06	-2.6878018163775164e-06	5.318421361056239e-06	6.22857473666595e-06	-8.64662156990628e-07	-1.0377128370628855e-06	-4.816129216421968e-07	-3.6047660675229662e-06	-2.5793304316694427e-06	-5.251753756621791e-06	-1.102443756659464e-06	1.0805078411705649e-05	-1.858357433135283e-05	2.320321996176431e-06	-9.590981549458482e-07	1.828584187449851e-06	2.2951243175667754e-06	1.4409539129512262e-06	-1.7179972473363042e-06	-1.5716401323696702e-06	-7.415091541400882e-06	1.4920297896444592e-05	1.198989277271278e-07	2.790633592031976e-07	6.559658635303745e-06	1.1769388292594329e-06	3.780780420876244e-06	-2.0380231254535084e-05	3.659781180722679e-06	3.706212649707092e-06	3.883585888225168e-06	2.0225001890558083e-06	2.9194483675590406e-06	3.103302739581029e-07	-1.8232641801172963e-06	-1.5649215516004426e-07	-4.630243966790721e-06	-1.1916322107808423e-06
VEGF signaling pathway: PLA2G4B	-1.12122398903565e-06	5.6755385926765e-07	1.4730210420504792e-06	-1.378328673756608e-06	1.8336447618439688e-06	-6.113880117192467e-07	-5.095093805833615e-06	-4.135148684859312e-05	-8.342400812667098e-07	-1.5607018741327993e-07	1.301509276979716e-06	2.8368743874256678e-06	-8.105174478153489e-06	6.079879956761941e-06	-4.385595630671214e-06	7.878621774914674e-07	6.270366179130502e-07	4.583127434012517e-07	-1.4492764347144383e-06	1.0125321546961686e-06	2.168841861410608e-06	1.346591184720087e-06	-7.910482045730508e-06	1.0968006495686483e-05	1.680100219949418e-06	-3.6145274823122804e-07	8.789075464549751e-07	-3.877364459867199e-06	-5.331557815983873e-07	9.193369565617936e-07	1.3897442615209398e-06	-2.227898555545276e-06	2.3627952234247704e-05	1.0859388440864858e-06	-7.111231621531061e-07	-1.590367568766839e-05	1.0071292513617517e-06	1.1604976794890738e-05	2.852804293337053e-05	6.276600242210367e-06	2.940568045107924e-06	-2.7736934596443184e-06	2.546255017091235e-06	5.594492178292857e-06	1.6868039039826386e-07	9.1606705119347e-07	-1.3379777891236098e-07	2.520272789566338e-06	-4.527953372503704e-07
Tight junction: ACTB MLLT4	-5.6761997179815245e-06	7.197787902355719e-06	1.0758917222469324e-05	-1.6219332372156427e-05	6.258946303402519e-06	-2.338596358932765e-06	0.0001165003345162	-0.0001931221785901	-6.437658837044327e-06	2.4347835277034605e-06	-8.30434388408514e-06	1.1306993087296086e-05	-1.6004473493431463e-05	-1.719333073608029e-05	0.0001070255998313	3.003720380007987e-06	5.315675599039806e-06	4.227641831735306e-06	-5.632296218879944e-06	9.350651634610953e-06	1.3793577564038492e-05	-3.812704524884303e-06	-4.49657213201279e-05	7.995925357220169e-05	2.3032989798803634e-05	-1.1513685219403384e-06	-3.503283525865171e-06	-7.875142287056949e-06	-1.5892280110366744e-06	7.231543128243627e-06	-1.2522472645638917e-05	-1.807249735789702e-05	4.071073847112001e-05	4.720486696578566e-06	-2.272509765166864e-06	-6.753963055449056e-05	3.64520783041493e-06	4.684424276675714e-05	0.0001872745847995	5.2138317977846834e-05	4.75067889971701e-05	-1.1997664266861291e-05	6.861754075418458e-06	3.85732423789966e-05	-6.119386591425134e-07	4.028540518239278e-06	1.360200834056994e-06	1.7004276036354888e-05	-2.0472333856578345e-06
Tight junction: IGSF5 TJP1 MLLT4	1.2351880103590264e-05	3.2708658061426867e-06	1.1649220022249572e-05	-7.310809140895149e-06	3.251631000194596e-06	-9.142441560263856e-06	2.3753158929984137e-05	4.765864099343196e-05	-1.5711745789188353e-05	-1.6716551200587731e-06	1.0067343506675728e-05	1.2591528420070174e-05	-1.4001128992176997e-05	-9.335711555346375e-06	1.8247142588664325e-05	4.394874256354394e-06	-2.6640519572440244e-06	4.028591498338085e-06	-5.3735784381703735e-06	1.6404443282961452e-05	1.4771023109087472e-05	5.738940081224762e-06	3.5008014289216567e-05	3.257443598379657e-05	8.483429081499969e-06	2.189459270087237e-06	3.725967859310689e-06	-3.936646383137755e-06	-5.458624977450536e-06	6.886153565731834e-06	-4.909214526203452e-06	1.14497834273941e-05	3.340523402205612e-05	3.2996862993531724e-06	-1.3473414156994603e-06	-3.3692276491303664e-05	4.576664022797488e-06	1.930518667244396e-05	0.0001605480947031	2.9300170443283623e-05	1.1322680694201737e-05	8.896615999770958e-06	5.4709735335453285e-06	1.2106318894857654e-05	-9.586930435488787e-07	1.47825738557043e-05	7.80991804696575e-07	4.4131652188576766e-05	4.684870426039351e-06
Gap junction: GJA1 GJA1***	-1.6013241066962823e-05	2.0603993003404133e-05	1.037411578059954e-05	-1.4941483311591875e-05	-7.169051771251268e-06	-7.937206051224066e-06	0.0001715650449347	0.0001205001632093	-1.5831535523608793e-05	-1.0886146247913274e-05	1.3435973969731984e-05	-4.791791022054372e-05	1.9779762738863665e-05	-3.5346006641100515e-05	0.0002099961532867	-5.196393988829779e-06	-7.2484445240336815e-06	2.567092290717589e-06	9.80778715219623e-06	3.350647495149754e-05	1.2093057274276433e-05	-4.20697421462843e-06	2.88330566863029e-05	6.394925529572847e-05	4.844660770852962e-05	-2.9162744492351e-06	-6.055419559587008e-06	3.5350803985017666e-05	-2.0223946501883657e-05	2.6654509499496784e-05	-9.41478232931324e-06	1.69930231972103e-05	-0.0001163036273588	3.1242338616761195e-06	-8.16326087342255e-06	4.589093340049079e-05	-2.0838295452337437e-05	5.9640030029453904e-05	0.0002787189180134	4.599694494740188e-05	-2.541602178990649e-05	-6.81559912722519e-06	1.4509569021806586e-05	2.899379490269292e-05	-1.875548852118079e-06	2.9572319648441184e-05	2.569005842971249e-06	5.578070698509432e-05	8.975782167612149e-06
Gap junction: GJA1 GJA1	9.680625574433478e-11	3.547276870521049e-11	-4.546326198763631e-11	-1.3250826637441959e-11	4.258911270752571e-11	-2.430316112657661e-11	-8.235956275518768e-10	3.292985278376088e-10	-3.143804806886507e-11	5.552947610176525e-12	-3.5226922221417106e-11	-8.703648724334572e-11	7.984093933379974e-11	1.1699593642751056e-10	-7.882376352248641e-10	3.8817683342148276e-11	-3.5154412379903056e-11	7.006730839512176e-12	-5.079150793235593e-11	1.2418492116675987e-10	7.444749349432283e-11	3.74345361691254e-11	-2.122838325254536e-10	4.303004934553403e-10	-1.2455040737947674e-10	2.2702762646906267e-11	2.966353430493026e-11	1.2957980122556552e-10	-6.718895715875271e-12	6.474206100036429e-11	7.254250295792819e-11	1.4150921920089488e-10	-5.462717799674371e-10	4.850040922878591e-12	3.4037518063400645e-12	6.386706306029158e-10	-5.836238293278663e-11	9.679882483993292e-11	-5.299979857166742e-10	-2.7217570306549915e-10	5.457087669420718e-11	-1.3192041762776864e-10	-7.386468815830094e-11	1.1919138734249603e-10	-4.077533153480271e-12	6.518105157664634e-11	-3.449852762737672e-12	1.341126726873726e-10	-3.810700676119876e-11
Gap junction: GJA1 GJA1*	9.680625574433478e-11	3.547276870521049e-11	-4.546326198763631e-11	-1.3250826637441959e-11	4.258911270752571e-11	-2.430316112657661e-11	-8.235956275518768e-10	3.292985278376088e-10	-3.143804806886507e-11	5.552947610176525e-12	-3.5226922221417106e-11	-8.703648724334572e-11	7.984093933379974e-11	1.1699593642751056e-10	-7.882376352248641e-10	3.8817683342148276e-11	-3.5154412379903056e-11	7.006730839512176e-12	-5.079150793235593e-11	1.2418492116675987e-10	7.444749349432283e-11	3.74345361691254e-11	-2.122838325254536e-10	4.303004934553403e-10	-1.2455040737947674e-10	2.2702762646906267e-11	2.966353430493026e-11	1.2957980122556552e-10	-6.718895715875271e-12	6.474206100036429e-11	7.254250295792819e-11	1.4150921920089488e-10	-5.462717799674371e-10	4.850040922878591e-12	3.4037518063400645e-12	6.386706306029158e-10	-5.836238293278663e-11	9.679882483993292e-11	-5.299979857166742e-10	-2.7217570306549915e-10	5.457087669420718e-11	-1.3192041762776864e-10	-7.386468815830094e-11	1.1919138734249603e-10	-4.077533153480271e-12	6.518105157664634e-11	-3.449852762737672e-12	1.341126726873726e-10	-3.810700676119876e-11
Gap junction: GJA1 TJP1	8.851369002464822e-11	2.3269267403761243e-11	-4.482699270459265e-11	1.253755360400546e-11	4.150691055531161e-11	-2.3170933757550447e-11	-8.474278897693283e-10	3.1904037779251944e-10	-3.104511664831172e-11	5.956897565078699e-12	-3.5631746631400355e-11	-7.001571911614055e-11	7.721193198500279e-11	1.1748181501225275e-10	-8.375467930121598e-10	3.811549147984024e-11	-3.301583721488831e-11	6.4323246346004376e-12	-4.542698678907431e-11	1.0730758168508443e-10	7.043071101204005e-11	3.532400047410235e-11	-2.085510327909253e-10	4.1598190194584027e-10	-1.3166879149726588e-10	2.35705722052072e-11	2.9661480562658016e-11	1.0901507838825328e-10	-5.128182835725836e-12	4.740292798973928e-11	7.287468663181272e-11	1.380424442685747e-10	-5.281618056986687e-10	4.915216296041685e-12	4.151189847434333e-12	6.247854357466168e-10	-5.5880352941979964e-11	9.387172751085844e-11	-4.884017336102387e-10	-2.6576431477032003e-10	5.970141717253374e-11	-1.230116904091775e-10	-7.606415648462482e-11	1.1484997398910751e-10	-3.396320597444283e-12	6.337514614825095e-11	-3.29162657447149e-12	1.2989717420689927e-10	-3.7395134427539645e-11
Gap junction: GJA1 GJA1**	3.089286488572605e-10	1.3460859168447408e-10	-2.0566341567066747e-10	-1.0764048292474603e-10	9.938606733087915e-11	-8.386340678450309e-11	-1.235001857641579e-09	-1.5720832079293515e-09	-8.381722599161786e-11	-4.1511295084328206e-11	-1.4679990583448388e-10	-1.5868260318157286e-10	2.732191057410062e-10	2.6380803080822474e-10	-1.077510585812599e-09	9.202689699598324e-11	-1.0137874398997487e-10	-3.086579596990106e-11	-1.8430753082275115e-10	3.6236814092842245e-10	2.9824836091269885e-10	1.2203670184661869e-10	-9.067585863079263e-10	1.5539880956559811e-09	-3.0544522616294536e-10	4.965626302511999e-11	9.437830024545163e-11	-1.7795315687497258e-10	-8.832392468101616e-11	2.0692306338050082e-10	1.2874599051781118e-10	5.458938128718409e-10	1.2409772912149355e-09	2.9724064607196086e-11	-2.9831338998146675e-11	1.040446698352437e-09	-1.5557640858768108e-10	-3.5990355203999987e-10	-1.1581903935211623e-09	-5.91095040476727e-10	2.0634883316061416e-10	-3.6470450494892465e-10	-1.6866250767661918e-10	8.743402884374829e-11	-1.0935684442414411e-11	2.2106959613744618e-10	5.4377851788208406e-12	4.2142717021819005e-10	-1.391021353653888e-10
Signaling pathways regulating pluripotency of stem cells: MAPK1*	4.931391719455735e-07	4.201386399029993e-07	6.161738524628541e-07	-3.265757846898772e-07	-2.4398716664791783e-07	1.5060125282421266e-07	1.5494666311637083e-06	1.253278169031371e-05	-3.571247205450175e-07	-1.348390251133267e-07	3.861418790453988e-07	-1.030196774770378e-06	2.09253955628654e-06	2.208913016389843e-06	4.5580245281102365e-06	-1.937810424265804e-07	2.2635715704365198e-07	8.413126258830653e-08	3.379914927862357e-07	6.098111595020413e-07	-4.1268225447047083e-07	-2.83810546041709e-07	1.5629842705647283e-06	2.4395932688008405e-06	9.79820345491763e-07	8.482416846911573e-08	-3.2636539698375895e-07	1.9642792957694256e-06	-2.1315322018211402e-07	9.810745892029837e-07	2.565803814084661e-07	-3.7970095747289253e-07	-3.2602681085257147e-06	9.430037953713545e-08	-1.539365605157459e-07	4.8967764378599225e-06	3.603189713862681e-07	2.08641051319931e-06	1.0068355640391008e-05	1.6204744632774226e-06	-4.103902728227433e-07	3.251182937814961e-07	4.857517136388831e-07	1.099094677363033e-06	-6.176040336366242e-08	4.600333429915127e-07	-3.849011945035373e-08	6.98117701373788e-07	2.409888111611587e-07
Natural killer cell mediated cytotoxicity: TNF	-6.675949217149167e-07	3.331274060648541e-07	4.471641798860834e-07	1.000360748738775e-06	2.805502041374507e-07	4.453217012981352e-07	2.3169363063749395e-06	-5.462840466359693e-06	1.4589235871532997e-06	-6.208729414547227e-08	-3.7509293411786194e-07	7.219206936443823e-07	-1.4319086563537191e-06	3.3723847753321674e-06	1.4367258441218545e-06	1.9598764345450125e-07	-2.979459419202794e-07	-2.76409636448917e-07	-2.012600709601667e-07	-5.643103780354265e-07	-1.0028010029207991e-06	-4.6911429493313386e-07	-1.777132655715454e-06	1.492764211414903e-06	1.5660466459945632e-06	-4.3642229271624194e-08	-2.105390312536936e-07	1.9123280690618707e-07	-8.523876131117835e-08	-3.045127873553543e-07	-2.969972754575793e-07	-8.485750833834271e-07	1.573037553335838e-05	2.590829174534344e-07	-1.0863529116025592e-07	-4.108735012203569e-06	1.9024362107281584e-07	1.5851673671158292e-06	4.008842313095363e-06	1.5397482251649103e-06	4.91411693838961e-07	2.790251462415264e-07	3.245485371591112e-07	6.51623657192458e-07	7.65590311527428e-08	-6.238844635077926e-07	-9.212209300823465e-08	-3.635668365801598e-06	1.0340866780465285e-07
Natural killer cell mediated cytotoxicity: CSF2	-1.9152961180159308e-07	1.0135057616015401e-07	3.732873817296841e-07	-1.944754031820716e-07	1.012078311895621e-07	5.46698529575571e-08	2.760802956839703e-07	-1.5131087996368062e-06	5.063700617110409e-07	3.5987292611724564e-08	-1.6356410551419408e-07	2.7485166282986173e-07	-3.6386256777929765e-07	8.559206287324727e-07	3.0592216797109506e-07	-8.089838207733274e-08	-9.111048062013137e-08	-1.1427018410616501e-07	5.563151593840682e-08	-1.411515843588203e-07	1.8081708577783397e-07	2.294337409350201e-07	-1.7692389307027108e-07	4.5457546541444893e-07	2.2041972964536097e-07	-1.8214499621139422e-08	-3.2533160957610024e-08	-7.505350977693018e-08	5.300917966174731e-08	-1.0533001810252283e-07	7.782695718258678e-08	-1.74093529033167e-07	4.857616737091274e-06	2.966928189653299e-07	-2.4715965257310544e-08	-1.6094655770045742e-06	5.78771571195916e-08	2.524307859996284e-07	1.1548295257390168e-06	3.642656441157972e-07	1.9393812655204838e-07	7.087415629266714e-08	5.182197871778224e-08	-1.150288227248543e-07	2.4345991661817804e-08	-1.0084989231326445e-07	-5.37037803501025e-08	-2.98439381216086e-07	-2.7870715883282146e-08
Natural killer cell mediated cytotoxicity: FAS	9.182042254611708e-06	5.01340923422329e-06	3.846816539211552e-06	9.736224460584178e-06	4.79312410861332e-06	-2.952271212923153e-06	2.836891468280881e-05	-0.0001144177949297	5.184698944403184e-06	5.047998905469564e-06	-7.710289456316386e-06	1.704694827208831e-05	-2.637724238343709e-05	5.382052369140544e-05	-1.9241858226032874e-05	2.817382367347029e-06	-3.862813614917175e-06	-1.7653785015100575e-06	-4.623109758010899e-06	3.234150453838501e-06	-5.683214311461728e-06	-8.682372116159878e-06	-9.430664383123084e-06	2.049008291559035e-05	1.8448308058833156e-05	-1.1210699113554582e-06	-4.095686017175729e-06	-6.8319690340244616e-06	5.433384285971413e-06	-3.4100202570929247e-06	-4.864377270221546e-06	-1.1059979222853882e-05	0.0001972032738657	4.390496518823079e-06	-1.6726511497430734e-06	-9.673008952830486e-05	3.5775053285248884e-06	2.1753677226691884e-05	6.590556821625516e-05	1.9252253422317848e-05	1.2276866552796064e-05	6.269835213994468e-06	6.1355147970315166e-06	1.818133936669857e-05	1.7984937003376308e-06	3.969926537788372e-06	-1.2109294980580264e-06	-1.6867243640659564e-05	-3.2855145990207077e-06
Natural killer cell mediated cytotoxicity: TNFRSF10D	-2.200622084174164e-05	1.1543512732075608e-05	-8.974825886096608e-06	1.862671787241594e-05	6.1381273722142175e-06	4.342873802863012e-06	7.604044375079201e-05	-0.0002409447498089	1.0313687507359968e-05	8.203048654451655e-06	1.7548699126800633e-05	3.26184518256196e-05	-8.510714857629554e-05	3.3466737967832264e-05	-2.834256751481872e-05	4.3976681436599e-06	-4.717671675635936e-06	-1.658418156151827e-06	-1.0100911077030293e-05	6.216149647674658e-06	-1.7397342538806804e-05	9.582171876412448e-06	-3.513975795677723e-05	5.046555066477398e-05	2.6722207061024183e-05	-3.376492468728515e-06	4.857666661637337e-06	-1.4708665355235558e-05	6.712975310216581e-06	9.48830252691914e-06	-6.98226193896766e-06	-3.3147014934830905e-05	0.0001522358617038	5.367680120923798e-06	-1.3852906298242017e-06	-0.0001774443993558	6.934182777048336e-06	9.594776659456358e-05	0.0001955985295607	6.46490395631135e-05	2.97091180594412e-05	2.022795143675937e-05	1.8439140122371328e-05	6.489130775492704e-05	2.448882064340593e-06	-1.1207449078336364e-05	-1.3514212837468185e-06	-2.248044257443733e-05	-5.698352288810317e-06
T cell receptor signaling pathway: FOS	-3.2252326410996324e-06	-2.399162126383309e-06	4.434138308410524e-06	-4.089826073536456e-06	3.1738471870348158e-06	-1.251909750772724e-06	-1.5809708216740028e-05	4.579352448283838e-05	-1.972214820484334e-06	1.0421141025387384e-06	2.2460564750558497e-06	-4.625905522446437e-06	4.295427982296103e-06	-7.590348043371392e-06	-8.286935208119747e-06	2.8459833146810884e-06	-1.6085990567601116e-06	-6.91240552788033e-07	3.346782913203899e-06	-4.057697424018156e-06	6.151684759589027e-06	-1.6964999164835066e-06	4.729584730061278e-06	-1.0257668442017248e-05	1.1061815410105444e-05	6.006454862819793e-07	-2.1130436957621142e-06	2.8128962688889744e-06	-8.558789499272387e-07	-3.872206995033477e-06	1.8831429667403365e-06	-9.150856686300296e-06	-1.8012988033594068e-05	-4.361719745994534e-07	1.2815992384991742e-06	2.8276279144784136e-05	1.970139913361896e-06	2.935873197028088e-05	5.056884800428351e-05	8.484215893848635e-06	-8.040121435797754e-06	2.792390681642127e-06	-4.505915691954196e-06	1.6577886713528714e-05	6.938175388838926e-07	3.257171801907992e-06	-6.179070211186497e-07	5.8286849954409e-06	1.6157417679249876e-06
B cell receptor signaling pathway: FOS	-3.4058013414880584e-06	-1.3556758738225664e-06	2.61722138549039e-06	-2.765473396237275e-06	3.631711997460972e-06	2.205461857744137e-06	-2.144857268541694e-05	-3.277907547871259e-05	1.0858923429017612e-06	-7.912571384671774e-07	-1.7223910432765334e-06	-3.407251934644467e-06	6.099520674488181e-06	4.118535347341505e-06	-1.5955750750874457e-05	7.435260328328541e-07	2.411177014670942e-06	6.030107978451828e-07	-3.430603457447353e-06	-1.4238459167160951e-06	-2.235614794526102e-06	1.8240358924128496e-06	-6.4325377086123614e-06	1.4090708534136196e-05	2.5207939276115885e-06	-5.926268551090831e-07	1.8110749621502083e-06	9.666890332078362e-06	-8.169401344737268e-07	-2.407713395819196e-06	2.291066967007593e-06	-3.1083767473723385e-06	8.88944366624386e-06	-2.723385129660428e-07	-4.674079855100381e-07	7.634495763290736e-06	1.7496093267160271e-06	1.3899705620807676e-05	2.0381059560135697e-05	5.310622802798231e-06	3.7108931913233234e-06	4.722805829164769e-06	2.3550555633402552e-06	1.1917490461353446e-05	2.482325336107218e-07	2.4975791773170057e-06	-3.234585181363441e-07	-6.403213632578922e-06	1.7533923410113988e-06
Fc epsilon RI signaling pathway: PLA2G4B	-8.246418871222801e-09	3.2728027000567563e-09	1.0568918330014008e-08	5.930242097638257e-09	5.926826523297546e-09	-3.157898997215458e-09	2.1284767601979557e-07	1.0626459101688113e-07	4.096535151220731e-09	-1.8599217272105586e-09	3.851084200116964e-09	1.3390494262891326e-08	-1.5596514050508473e-08	-1.302442723047401e-08	1.5541118637432596e-07	6.588715882197285e-09	-3.427004001969181e-09	-2.713592121832497e-09	-2.258887905304368e-09	4.6833825961479514e-09	-4.631780297029927e-09	-4.180335534295939e-09	-5.449361145726375e-09	1.4854765035454674e-08	4.366868974910042e-08	-9.06643537092648e-10	1.9246614620274637e-09	-1.6207830829456012e-08	-3.588027181126531e-09	3.3248724263010503e-09	-1.1572701334005998e-08	-1.6529310774940922e-08	6.756233722464089e-08	3.922240861216623e-09	-1.4514788458371992e-09	-2.05179601862264e-08	-2.22485943944062e-09	3.0692848068731344e-08	2.058005294725069e-07	4.5474233943984814e-08	-1.0476295445261997e-08	5.433667253714574e-09	3.2561739636009838e-09	8.593237106459689e-09	2.605274307493589e-10	2.738316371982643e-09	5.17838624638146e-10	-8.761182484762324e-09	2.8377882949845453e-09
Fc gamma R-mediated phagocytosis: CFL1	-2.163032282747792e-06	-8.29781948218436e-07	1.078505031198984e-06	-2.590141262267914e-06	1.267152543572789e-06	4.873576037435708e-07	-4.65204976443366e-06	3.008003027668744e-05	4.994136226233031e-07	-3.691618688596468e-07	1.3391945953648944e-06	-2.1524656254021995e-06	2.389064843324192e-06	-4.096308783160093e-06	5.552039594719962e-06	-1.1268661771927995e-06	1.113343245503131e-06	5.310824696928278e-07	1.024215786978698e-06	-5.473018010552772e-07	2.469536009280709e-06	-1.0239287003966727e-06	3.983191516807777e-06	-3.5807648554096503e-06	-2.799186133300573e-06	-2.666363387731044e-07	-5.568686946243071e-07	2.3056937327019742e-06	2.450761493556624e-07	7.718657867265093e-07	5.97147023658305e-07	-1.000106998907353e-06	-2.317026182706464e-05	-2.3164629894744717e-07	-5.800360159735658e-07	2.1715763436793625e-05	6.044721897414121e-07	2.269504293222505e-06	7.914313861502933e-06	-3.5982297835960324e-06	-1.4525654747407409e-06	-8.476580242665425e-07	1.530206580057142e-06	1.9153812712946767e-06	-1.0863168697690602e-07	-7.690266236317221e-07	1.2611090714826548e-07	4.562477560675584e-06	7.200296095870831e-07
Neurotrophin signaling pathway: ATF4	-1.0906616849611182e-06	-2.393858710450376e-07	2.2476296257266146e-07	-3.7652620622464155e-07	5.938229849460402e-07	-5.271264956010396e-07	4.933982333910388e-06	4.4280830218274006e-06	-3.189951968881806e-07	-3.145548956460916e-07	8.1762526909323e-07	1.14144951751158e-06	-2.208228910925439e-06	-1.7488302995770655e-06	1.576312593157468e-06	1.1388787942963266e-06	-2.6484993005923815e-07	2.472372969746745e-07	1.0530508513326106e-06	6.651485208004053e-07	1.4593407622117347e-06	3.936059985786306e-07	2.297801383186749e-06	-2.422820533399307e-06	1.6001064527006632e-06	-1.2268289270834768e-07	2.8232377728465134e-07	-1.2405709725147345e-06	-6.29261061260362e-07	-6.185335597870199e-07	2.543526345505853e-07	-1.940491007759386e-06	4.460369507497693e-06	1.731474169626556e-07	-4.329913141158327e-07	1.8773579633743292e-06	-5.554463181946032e-07	3.7777950744640192e-06	2.1519571460307974e-05	2.52735843844212e-06	8.210762582821497e-07	9.986869685440876e-07	-6.108346603205179e-07	1.2706395541816806e-06	-6.719896319443661e-08	7.50341264005783e-07	4.3419764403336766e-08	2.0830413300030425e-06	3.394381908950264e-07
Neurotrophin signaling pathway: NFKB1	9.002161990497424e-11	3.466369964083924e-11	2.3543775042877254e-11	-2.157697642596397e-11	-6.161101918700925e-11	3.012552990335859e-11	-2.639274852522249e-10	1.69978394971689e-10	3.5068450991554046e-11	-1.2874841120241398e-11	-6.070162344584174e-11	-7.58383806688926e-11	2.0299018644805536e-10	4.806852677618867e-10	2.2777878115476477e-10	-4.279951718992517e-11	1.9280638624061967e-11	-1.0980587738578135e-11	-3.271363658101673e-11	-4.7390747035662666e-11	-1.1009326563903232e-10	-3.1376438060935137e-11	1.9996565653279022e-10	2.735675715644725e-10	-8.596042359239744e-11	4.243254630145601e-12	-5.5257148888622186e-11	1.8601874250575912e-10	-1.2072829649670966e-11	8.6058610855288e-11	-1.5238004821724767e-11	4.9912225328025397e-11	-3.1442411319755955e-10	1.2093941355917822e-11	1.7597080075120624e-11	-7.462701184695012e-11	4.417571298448202e-11	3.278235144942064e-11	-7.321972762366951e-10	-1.8290767906464696e-10	2.3822260763199537e-11	4.536100976779611e-11	-4.6492164997177493e-11	3.245535857858564e-11	-3.4553377801907106e-12	-5.7005284439523327e-11	-2.567514727187184e-12	-1.3012111850915368e-10	7.455353158726387e-12
Neurotrophin signaling pathway: FOXO3	-4.132734882941544e-10	-5.6339004664786734e-11	1.2797304325741295e-10	-1.1903449765303622e-10	8.7940412746555e-11	-1.0134138879167096e-10	6.331736824954307e-10	1.7904329097044959e-09	-2.1610367204319887e-10	3.351750436914282e-11	2.9488643655599807e-10	4.221045482569712e-10	-6.317002021339291e-10	-1.330364164620837e-09	-6.639079572682686e-10	1.3846453666109418e-10	-8.920052616006425e-11	2.1947789701218695e-11	1.1016412741516514e-10	2.568421158936959e-10	2.7927505439808966e-10	-9.121730860330748e-11	5.959738154591053e-10	-8.600117013334178e-10	6.070291320299655e-10	-4.2543141733617276e-11	1.2095052230116114e-10	-5.133672603839533e-10	-3.13885380972317e-11	-2.2499118512516496e-10	-4.8965590028279e-11	-4.833319576766605e-10	5.275224369089976e-10	-1.2500607878760306e-11	-2.9026846451300408e-11	3.9927751304344605e-10	-1.2742725605065642e-10	4.4982225062221725e-10	4.340160074137665e-09	8.28164905221853e-10	1.4963100779545526e-10	3.1400963840366356e-10	1.7516997042389074e-10	2.968996627889653e-10	-1.4360014567410236e-11	1.589321193692218e-10	9.902137806491504e-12	5.052142647551252e-10	6.029926164720871e-11
Neurotrophin signaling pathway: BAD	-2.108427403479992e-10	-1.0306760947475192e-10	-7.505998767649411e-11	1.1234508390643208e-10	1.2200319056351006e-10	-7.938231061496433e-11	5.246351651598774e-10	9.241748270755391e-10	-9.149782187159173e-11	2.9010449589829743e-11	1.4512780889312908e-10	-1.3926952018295812e-10	-2.030096891576281e-10	-1.3455841455462084e-09	-4.1970503067401326e-10	1.1625905006144569e-10	-5.4394530338732254e-11	2.1464612832796622e-11	8.356076910737217e-11	1.07004824994593e-10	2.0659755948663768e-10	7.537246296115512e-11	-4.553109755952973e-10	-5.11342385449209e-10	2.0963419593465816e-10	2.3605899207566057e-11	1.0605691135643691e-10	-1.7049665607024355e-10	5.235869618446429e-11	-1.6404209448375375e-10	5.603174565398025e-11	-8.837366160682041e-11	-1.250578975884926e-09	-2.519427781370871e-11	-6.940364073925366e-11	1.0395516405117736e-09	-1.0745819905570776e-10	3.4233304769090757e-10	1.6553576813574935e-09	3.5180943012128116e-10	-1.0157112865093824e-10	6.581139440975664e-11	1.3733384374138074e-10	-7.938426125187735e-11	1.0792893651893944e-11	1.5740846260547158e-10	9.488168088406876e-12	2.770491521113879e-10	4.141432628556998e-11
Neurotrophin signaling pathway: GSK3B	-2.5895817814319776e-10	-8.306688987648931e-11	-9.908869155090996e-11	8.348596832132105e-11	1.8646740995921862e-10	5.353826758292916e-11	1.437594801624133e-09	-3.675506860541761e-10	-5.248395711485445e-11	3.346511239140194e-11	1.6308108198913608e-10	-1.8144018076641538e-10	-4.574703785959157e-10	-1.413411828944514e-09	7.532114928646777e-10	5.1099398655480295e-11	5.4180183222619645e-11	2.4817946522535164e-11	7.642862350648158e-11	1.1473495741015836e-10	2.9755352775781236e-10	-8.409518827209469e-11	-5.072386804046476e-10	-6.745806910212521e-10	3.3690777346530714e-10	-1.2806419968790439e-11	1.5851535971015384e-10	-3.6049945815651806e-10	3.973160356782538e-11	-2.4028272133892737e-10	-1.0642115148759576e-10	-1.956336351467549e-10	-3.4555514285762876e-10	-7.992584358347141e-12	-5.5541407705883436e-11	4.1076845966023756e-10	-9.479121065781975e-11	-1.5958987696080367e-10	1.8608870630009382e-09	4.789728090868327e-10	7.283021113106307e-11	-1.3497810713061278e-10	1.212316104802469e-10	-1.0744378869140763e-10	1.0471635475612632e-11	1.1293787018963364e-10	1.2915610534203191e-11	1.5056909207391626e-10	-3.8322500525176595e-11
Cholinergic synapse: FOS	5.446048032369425e-07	-1.6002866133248306e-07	2.131466598027558e-07	-3.198884259607517e-07	-1.3404164899066768e-07	1.0591703147667233e-07	-1.371415555464668e-06	6.98458684334605e-06	-1.100239664648273e-07	6.230893246490766e-08	3.190969692635158e-07	-5.530873192629965e-07	7.578645384435512e-07	3.1201652245449194e-06	1.8506040334496496e-06	-9.611130738557745e-08	2.4213912960497765e-07	9.17477525286029e-08	-2.948124430348823e-07	2.667155797735566e-07	-3.888501790966802e-07	2.0503459596195385e-07	-1.7497818044840586e-06	3.611050183698171e-06	3.462766634653419e-07	2.81125548077122e-07	-1.7520258881503074e-07	9.631573753628505e-07	-4.10880020193901e-08	2.988976245054124e-07	2.043187064757683e-07	1.1748016117179616e-06	1.2480718534425402e-06	1.357924292914439e-07	-9.705174386087705e-08	7.099008237821688e-06	1.7279668218744028e-07	3.564471854073702e-07	3.841241032620602e-06	-8.197645410990084e-07	-6.498844558152139e-07	-8.854611495466877e-07	-4.490745436177008e-07	1.5828422052342369e-07	2.6352275563025283e-08	4.954342444664227e-07	3.0828501498230935e-08	2.3443671728772082e-07	1.0306842710895249e-07
Serotonergic synapse: CASP3	-2.7704563489165325e-06	8.960350620550192e-07	-8.782844556872435e-07	1.7705491341443973e-06	7.777249348362224e-07	4.100780272972356e-07	2.140222240486232e-05	-2.4356262940505383e-05	1.084867505723879e-06	7.970359320722602e-07	-9.702905810046522e-07	3.640688699765396e-06	-8.00871289401435e-06	-1.1672463439118937e-05	1.355375891244685e-05	-4.5369143878262034e-07	5.247603213074698e-07	-2.028484824164213e-07	-1.5728625252086917e-06	-2.0840538631545184e-06	-1.5088932734093498e-06	-8.641263664249594e-07	-7.818941575577188e-06	-7.026314068722256e-06	2.483908260982896e-06	-9.501886192553716e-07	1.304920383784624e-06	-7.391049733330368e-06	1.3020733781729647e-06	1.0327879624470213e-06	-2.356776852554316e-06	-3.2177543979389568e-06	5.128455165965475e-06	-5.010044325488504e-08	1.466515805223569e-07	-5.44003535094227e-06	6.207097666371622e-07	3.445252282052144e-06	1.8348115416427373e-05	9.00339489203603e-06	3.868372875971907e-06	-1.49025260753197e-06	2.4774973406088592e-06	2.7921989329968884e-06	2.3726468795709946e-07	-1.4984565073868978e-06	-9.452321214956814e-08	-2.8343247839571463e-06	-8.117943381962684e-07
GABAergic synapse: GABRA1 GPHN	7.20747528890483e-05	-1.1269704745349216e-05	-1.7580194470103013e-05	-2.033148146581452e-05	1.4016079863673937e-05	-1.7239245279878563e-05	0.0003025387314429	-0.0002427038263613	-2.516415537586501e-05	-9.19104162955504e-06	-2.50447825689646e-05	-6.562885216160246e-05	8.715080239820003e-05	5.385402237476834e-05	0.000166748939001	1.924417312771071e-05	-1.140332514079356e-05	1.0330223222719874e-05	-2.0491843686764024e-05	2.0307720319952408e-05	3.0430721382960167e-05	1.461592402899133e-05	-8.712344587934035e-05	0.0001558559464275	-3.1120818943275275e-05	1.1518239820944029e-05	9.37154589291168e-06	6.556729558695192e-05	-1.5250240025836624e-05	9.971868903052624e-06	-2.5251392303507407e-05	6.344201396659242e-05	-0.0002264693579012	-8.307574356454118e-06	-6.986497251650275e-06	7.312428139751957e-05	2.1694156743372997e-05	-2.756809228478863e-05	0.0001631578318988	-0.0001107129766317	4.228818271181289e-05	-3.165945720358647e-05	-3.220760133248468e-05	1.1880497977600897e-05	-2.061549464483764e-06	5.465341310862279e-05	-1.6367967472333666e-06	4.446869573012791e-05	-2.4324303835703277e-05
Regulation of actin cytoskeleton: ACTB ARPC5	5.810611029881916e-10	-1.0966944156343283e-10	5.063490168632938e-10	-3.4245066983044067e-10	-3.4124657652134415e-10	-1.6551469508470118e-10	1.0313750393132444e-08	3.600483539750651e-09	-3.5744335914469787e-10	-1.9205593550872783e-10	1.8971957794532457e-10	-1.157160578345312e-09	1.5003902556164955e-09	-1.1822707977537126e-09	9.766479070574014e-09	-8.850513691770594e-11	1.5740241465658524e-10	9.093594012528742e-11	3.783505489190131e-10	4.25763762110805e-10	2.9602692504027947e-10	1.711528675012246e-10	8.707394642368723e-10	2.152267375906234e-09	1.4567460244922556e-09	1.8445514781296432e-10	-3.4327951371915646e-10	1.6236078364777376e-09	-2.4602227609254744e-10	4.1285087116695567e-10	-8.543370291300207e-10	7.385091986771427e-10	-1.6632158713521295e-09	2.9064651880822155e-11	-2.818673322012291e-11	9.05328349065685e-10	1.6169223341458732e-10	1.0369823049792575e-09	8.159689005675888e-09	2.786270886470419e-09	1.0215064267098421e-09	3.5858581830447164e-10	-5.09178333363491e-10	3.0429329562571285e-10	-4.347036540232452e-11	3.6729782615970225e-10	4.505710817679478e-11	5.80643316238325e-10	1.9412707964080584e-10
Regulation of actin cytoskeleton: CFL1 ACTB	-1.1225464179086556e-06	-2.453201713929272e-07	-6.212765095555885e-07	5.226602590755382e-07	4.100128872206517e-07	3.425714842042452e-07	-9.259781583712115e-06	4.083722802212327e-06	4.610220745546401e-07	2.1464721996678586e-07	-5.174468725746678e-07	-5.80432810204773e-07	-7.141232454421426e-07	1.5860346575469906e-06	-8.530275865353911e-06	2.106192597965853e-07	-2.917648081091598e-07	-2.0303750375645825e-07	-7.007837178042987e-07	-7.786777351545321e-07	-1.2479748297070383e-06	-2.825301097440533e-07	2.794996974596488e-06	-4.111427410188136e-06	5.668158031946096e-07	-3.1259866460103457e-07	4.373139897032502e-07	-7.527132423645387e-07	3.212878636710743e-07	-5.976736067457453e-07	8.120376841674155e-07	-1.3175643545169065e-06	2.719988466394781e-06	3.369130038822203e-08	-1.925259501965399e-07	2.048954386384336e-06	-4.046899740230817e-07	-1.535764202117555e-06	-5.474029054057483e-06	-1.35347475002858e-06	-1.270473277607174e-06	-9.590530110598348e-07	-4.811403301347808e-07	-4.983741073790583e-07	4.7425609962834714e-08	-9.623366808697677e-07	-4.069842129062676e-08	-1.917114089847227e-06	-2.903552851981134e-07
Regulation of actin cytoskeleton: MYL12B MYH9 ACTB	-2.701519749313483e-13	7.230944852020668e-14	-3.361421829716309e-13	2.896120661407514e-13	1.340267222373631e-13	-6.554371148148626e-14	-3.129804351361828e-12	-5.67922544853531e-12	-8.523619456281295e-14	1.8712760108994325e-13	-2.5978172351794176e-13	-2.747975767149357e-13	-2.831157753985595e-13	6.8704702381006e-13	-3.0074205356237807e-12	5.168099567594527e-14	-1.3693808646475284e-13	-8.091446879451018e-14	-2.5530590211776256e-13	-1.3034648767645098e-13	-4.3481872520775353e-13	-1.3279841521823261e-13	-6.411653776648948e-13	-1.4342024145644369e-12	4.148212171689805e-13	-1.5588404661055446e-13	1.5106620823780646e-13	-3.370785362913248e-13	2.5653499712791974e-13	-1.7231135424316217e-13	2.732366422961648e-13	-5.340919047736538e-13	2.8099893154433346e-12	4.0632092433496077e-14	-7.382259553195477e-14	-3.761191041536406e-12	-1.8151913362965377e-13	-8.430544206436328e-13	-2.5959911862740626e-12	8.934573597970444e-13	-5.116332193117728e-13	2.01141944723547e-13	2.8748969629655977e-13	2.403796203973944e-13	4.341742883147677e-14	-2.684032313888731e-13	-2.7956356328051955e-14	-5.458043179121054e-13	-1.4228022013844265e-13
Regulation of actin cytoskeleton: PXN	-8.700222741348056e-07	-1.593896967552739e-07	-5.591631592330962e-07	4.887975131422547e-07	4.089956928717423e-07	2.0918140757456415e-07	-7.042374851476821e-06	-4.187196290214136e-06	3.148217422580643e-07	1.8787092113023042e-07	-4.133635535327154e-07	5.809582018952893e-07	-1.4419652906054509e-06	1.3100960418020406e-06	-7.015985051796442e-06	6.333559194730106e-08	-2.469954286554775e-07	-1.987225244119709e-07	-6.197884223300666e-07	-5.142809737304332e-07	-7.97833046150463e-07	-3.0150454524545e-07	-1.7769781981612696e-06	-3.619179846785596e-06	-7.399568605955403e-07	-3.2624051173740866e-07	4.865424785238613e-07	-1.6325143014419635e-06	2.7825130205716864e-07	-5.334127017520966e-07	5.469349834141686e-07	-1.0337181294736553e-06	1.9440747540656305e-06	-2.203044188994737e-08	-1.0624700143010873e-07	-2.096068590610461e-06	-3.438714992880523e-07	-1.1454277151706042e-06	-5.42386733885695e-06	-1.6500670835214549e-06	-8.189722309840292e-07	-7.217468017461781e-07	5.530087259016006e-07	-2.736819273943682e-07	5.3988899658095736e-08	-7.57959910411135e-07	-4.300294000415472e-08	-1.0444450101052137e-06	-2.876483789176922e-07
Regulation of actin cytoskeleton: IQGAP2	1.235457323697769e-06	5.468429748804303e-07	1.6773787923185775e-06	-7.473978490789075e-07	-5.950177866225929e-07	5.096533022511026e-07	1.3794930296345105e-05	1.5301511296959613e-05	-8.575830720682302e-07	-5.408156877800198e-07	1.044228206928498e-06	1.3831608704297886e-06	-1.8468676932102104e-06	-1.5314551384758732e-06	1.28270965188784e-05	-4.838428932409386e-07	5.229778435400956e-07	2.863756680902075e-07	-6.859082041930273e-07	9.915352662818324e-07	1.1195751265507237e-06	-6.207186821896833e-07	-3.7001342928794415e-06	5.902778656812101e-06	1.5534836482140518e-06	4.1006839922139163e-07	-4.342706157385359e-07	1.0647229681297951e-06	-7.196435618036535e-07	7.791640811367056e-07	-1.2084304016140538e-06	2.7939740245819566e-06	3.475329558008249e-06	9.961508006944469e-08	1.7233942654373525e-07	4.716377000433932e-06	6.789240052703176e-07	5.930877714421565e-06	2.030966087565906e-05	4.037250140241423e-06	2.4682266709095244e-06	1.1561639770529638e-06	1.171026978842366e-06	2.096902327047846e-06	-8.32421204747132e-08	1.407765006818444e-06	4.970131458302835e-08	2.464992709626212e-06	5.960417322413243e-07
Regulation of actin cytoskeleton: PFN3 ACTB	-2.5438378222868967e-09	6.435548781472073e-10	-2.169130390613706e-09	4.543175268707947e-09	-1.0827835109173342e-09	8.721095954988983e-10	-1.6766558010047934e-08	2.0832016901048572e-08	7.797272226236795e-10	1.5795495723071324e-09	-2.058844468619853e-09	-2.409748121826398e-09	-3.6029940785281998e-09	5.404063147847218e-09	-1.4904086868783268e-08	5.21198022093926e-10	-1.2581710331723887e-09	-1.2971959508106864e-09	-1.6369431117733432e-09	-1.2908467858156086e-09	-5.810714964627884e-09	-1.0289362514842228e-09	-8.84711241595352e-09	-1.0509767430962972e-08	5.562062570562733e-09	-1.0964042427157286e-09	7.151336445732702e-10	-1.3581137108574326e-09	2.094376125630653e-09	1.1234075216338412e-09	1.5749361916267927e-09	-5.598477799852341e-09	2.243131662889228e-08	2.70316065726445e-10	-6.01381957394324e-10	-1.1312306802546696e-08	-1.035274006434495e-09	-2.589569282211769e-09	-1.35671655179669e-08	5.048012522823885e-09	-3.232323708872616e-09	1.996671494908229e-09	2.153367913066236e-09	2.833675936961576e-09	4.5654781016011865e-10	-2.113523274674659e-09	-2.8750773209638787e-10	-7.364708341055803e-09	-9.256276462621175e-10
Regulation of actin cytoskeleton: VCL*	-5.435273151815749e-12	1.528189828559037e-12	-3.729116888139703e-12	6.859300903674458e-12	-1.8950995119367797e-12	2.108752849423421e-12	-6.007566966846906e-11	4.26300664455021e-11	2.065649994386627e-12	2.7000219989936063e-12	-5.459038001430294e-12	-4.673478326567587e-12	-8.266164096889411e-12	1.4341641012971796e-11	-5.826329239253282e-11	1.908428195278049e-12	-2.966586791993339e-12	-2.898443084979609e-12	-3.750314664121543e-12	-3.5796597441821507e-12	-1.1878947608732648e-11	-2.9972584048705545e-12	-1.9129269506727555e-11	-2.4574127683239247e-11	1.1662393829603874e-11	-1.7041431606719646e-12	1.9202884347982488e-12	-4.324848471132901e-12	3.114329969212153e-12	-3.186649150159752e-12	5.2318176215066976e-12	-1.005783328834956e-11	5.9068059647505e-11	8.051802566497222e-13	-1.4251027156522165e-12	-3.111722634287004e-11	-3.4315298371377336e-12	-5.0859825594918405e-12	-3.286729043558421e-11	1.5342330289103637e-11	-7.228377732800109e-12	5.039899743903055e-12	5.3936050729337364e-12	6.921107183630716e-12	8.703548187122396e-13	-2.8168487844384197e-12	-6.529697619229759e-13	-1.8315305037954858e-11	-1.8583318616084512e-12
Regulation of actin cytoskeleton: ACTN4	-6.01877914930417e-12	-1.83990969783394e-12	-5.154971077084564e-12	9.075554075222496e-12	2.3695774512897146e-12	2.220104352022631e-12	-6.340213828306898e-11	4.9859686147667794e-11	-1.8990553395684798e-12	3.422813607109492e-12	-6.623709598337213e-12	-8.10921227550094e-12	-8.718350558390403e-12	1.5917829899761077e-11	-6.475795033747192e-11	2.3228301500430063e-12	-3.428233607938323e-12	-3.4624257274756205e-12	-4.8686882224537625e-12	-4.38222473017692e-12	-1.5423181095618587e-11	-3.1527979550843348e-12	-2.1211179396137903e-11	-2.8317902087540614e-11	1.3316365641667212e-11	-2.183452656439665e-12	1.9646157759409217e-12	3.4905588027130802e-12	4.0461852218337326e-12	-3.785415447101342e-12	5.257877856626752e-12	-1.1730295539647864e-11	6.285541566505325e-11	6.675235662747756e-13	-1.603195107837914e-12	-3.197096053360244e-11	-4.061569735963034e-12	-6.505687799710488e-12	-3.813347145924354e-11	1.5532111014175143e-11	-8.778329040798966e-12	4.766515102569939e-12	6.728907657275344e-12	9.731276231540007e-12	1.0863541700548717e-12	-4.122084011489316e-12	-8.451951708461347e-13	-2.3807612256388858e-11	-2.62774668221448e-12
Regulation of actin cytoskeleton: MSN	-4.153787576561053e-12	2.2739886460757854e-12	-4.927129601625235e-12	9.951853727050998e-12	1.6389668645812644e-12	2.620394573077185e-12	-4.8687765168590826e-11	-6.845814696687942e-11	2.8839254713499803e-12	2.273496794561448e-12	-7.055781670846803e-12	-6.469071963306303e-12	-1.3295236908125423e-11	1.6937914988436907e-11	-4.3349943097628377e-11	1.2634333564901905e-12	-2.870180892945672e-12	-3.4734580148122215e-12	-3.5792774269453432e-12	-3.646621126228388e-12	-1.3907217894838682e-11	-3.496412589116503e-12	-1.8245471125817817e-11	-1.823674452748697e-11	1.3296245496095864e-11	-1.6235851338369605e-12	1.6141923344716877e-12	-4.595785778719513e-12	2.4338100884747134e-12	-2.332662028041675e-12	4.005534373899165e-12	-9.980930724614363e-12	7.26415998201969e-11	1.1956761506387145e-12	-1.4923890486165729e-12	-4.9234113366142706e-11	-2.5694044792518038e-12	5.559140562549054e-12	-3.152244981780508e-11	1.5868563620003826e-11	-7.951319173885051e-12	2.9834557729650697e-12	6.5077248780663234e-12	9.12553808080702e-12	8.67222224550721e-13	-1.5898097810588485e-12	-7.390576239780703e-13	-2.6058637351694785e-11	-1.865984902495547e-12
Insulin signaling pathway: EIF4E	-5.924883820199284e-14	-1.1672969341836886e-14	1.557555773046747e-14	-2.2195280080919475e-14	1.9817393887306184e-14	-1.1313641789582194e-14	-6.038754726976964e-14	4.850963958245699e-13	-3.104133319355957e-14	5.954797267809476e-15	1.9744453627845423e-14	-7.880161882368485e-14	7.019678087666582e-14	1.1109405513768105e-13	9.587848557207689e-14	-9.272794014246564e-15	1.0536019848771634e-14	5.544905002973912e-15	4.159978264832789e-14	-2.562864339165436e-14	-3.8025265456428575e-14	-2.0082524278081532e-14	6.301651954603401e-14	8.28198354135647e-14	3.5063792746466545e-14	5.8359624206421705e-15	-1.9531544836042922e-14	6.720008422096306e-14	1.1940245958581881e-14	2.260348181780592e-14	-1.3119909267768084e-14	-3.2840449577494735e-14	-5.393085301107854e-14	3.313751497240064e-15	-7.730751233420735e-15	2.509425477712634e-13	-1.231118132047444e-14	7.778944608941616e-14	1.8407876445881012e-13	-7.868255842397042e-14	-4.7023484099261265e-14	-1.5447516901535955e-14	-4.4281140069849144e-14	8.423743080843373e-14	4.148969032750856e-15	-2.9148763873638035e-14	-2.265884556833116e-15	-2.879381216263788e-14	-1.2520236505289926e-14
Insulin signaling pathway: GCK	1.6290320271497227e-11	8.432176586124129e-12	-1.7066390575309637e-11	6.361521303111285e-12	2.0347393854537582e-11	-1.0968006574968296e-11	-1.2904604063482658e-10	-7.943561967391259e-11	-3.784693421020032e-12	-3.3147812587346517e-12	9.113597571011456e-12	1.251667848592461e-11	-4.218976767234624e-11	-1.8111161370650327e-11	-9.694283483644324e-11	-2.917792130472979e-12	-7.534286038529024e-12	4.326699739804505e-12	-8.909594310167416e-12	-1.376337254455894e-11	-1.162107670119154e-11	-4.20661006313198e-12	-1.4656726473057705e-11	-3.419372064273705e-11	-2.8442769816994403e-11	-1.3838105170666388e-12	7.533400595359249e-12	1.856570873233385e-11	8.219636712250461e-12	-1.2675045777508772e-11	6.200025533466607e-12	-9.415958791555872e-12	3.522977074159102e-11	-2.182717606350952e-12	2.142283580456272e-11	2.7991768712042918e-11	1.2474665053105604e-11	-8.121548784814837e-12	-3.5656670808165976e-10	-2.989409337638272e-11	-1.2892034373312602e-11	-1.3453886584144294e-11	-1.0891706082462118e-11	5.985141103280681e-12	-1.9275083780732385e-12	-8.753482749353627e-12	1.1874736641733568e-12	-8.175837078223997e-12	-2.7928736697622363e-12
Insulin signaling pathway: ELK1	3.339461291344468e-08	1.6077405356530182e-08	3.6274195055175935e-08	-1.5546923818356583e-08	-2.8968058411763118e-08	2.162799881783152e-08	4.0764496395208956e-07	2.777869476749301e-07	-3.2269031516342274e-08	1.5195241657336106e-08	3.053084338241716e-08	-5.6331919138051794e-08	7.064465956631941e-08	1.31771925316803e-07	4.725773730498454e-07	-2.8672007519006064e-08	-1.5513482105953194e-08	6.453602703868511e-09	5.0638637504939515e-08	2.3255280994278417e-08	2.9248185454836848e-08	-1.9124204966154187e-08	7.242451481586634e-08	1.479029656297447e-07	6.15295350632165e-08	3.077606780311724e-09	-2.2231165004008685e-08	8.208874997721203e-08	2.219400570528372e-08	4.451690063509897e-08	-3.61091101566248e-08	-7.328322273428776e-08	-1.145707506455586e-07	4.6955777820982835e-09	5.705673704764916e-09	-6.70283222808786e-08	2.53524507812575e-08	1.7670521289862559e-07	3.404218323549286e-07	1.305715885669637e-07	3.982659523805783e-08	2.414854342198331e-08	4.973094268235273e-08	9.181212236699833e-08	4.547562945847854e-09	1.4179723824145994e-08	-2.7443438308043917e-09	3.3465041108484855e-08	-1.2030311241341934e-08
GnRH signaling pathway: ELK1	1.1305215152498874e-08	-4.804698543237571e-09	3.999650183838752e-09	1.1496297445496972e-08	-4.549623925904023e-09	5.256852450210319e-09	4.7612738802789286e-08	1.9879605071626254e-08	-6.000059669335266e-09	-2.007467243642772e-09	-9.506324510989238e-09	-1.2802702929389357e-08	1.062827485382762e-08	4.7750185119732544e-08	2.4525136071148928e-08	-3.81743926344624e-09	-2.496264341349269e-09	2.172972726320479e-09	6.072665753644276e-09	-6.555446115944419e-09	7.86336254278668e-09	-4.842453095674022e-09	2.5810624656892147e-08	-2.585119810434969e-08	-1.4916911155327742e-08	2.387698895983095e-09	3.268914225891765e-09	-2.4649111662363592e-08	-2.693427370329941e-09	-1.0163595582039276e-08	-7.510796956920012e-09	1.25606360117105e-08	-2.1571502574148892e-08	-1.705519788622746e-09	-1.3400908065364016e-09	-1.7406269991100162e-08	-2.638008291467668e-09	1.8341834627200068e-08	8.638255054857253e-08	3.7432571069170974e-08	2.1462585987903323e-08	-1.2460385668950746e-08	8.944389763311434e-09	1.594348498219882e-08	-1.7633356560310962e-09	5.7364450253822005e-09	-3.9859711748071514e-10	-6.167157372045921e-09	-6.474867482468621e-09
Progesterone-mediated oocyte maturation: ARAF	5.3526633894140006e-06	1.5925189244549323e-06	2.983524437961471e-06	-1.1144266221297475e-06	2.3964404427733614e-06	-1.117860498825407e-06	-2.632633854362207e-05	1.7321651981706164e-05	1.5454235090984442e-06	6.297379216516494e-07	3.5663498722906057e-06	1.0311537585505535e-05	-9.427078081703258e-06	-5.242252856761346e-06	-3.354329472443203e-05	3.6281050932698742e-06	7.894929336506527e-07	4.133032450061436e-07	-1.7255238079991271e-06	-1.606442629154656e-06	2.4504765896810405e-06	1.6444446137846537e-06	2.5919987815672974e-06	-5.929443747838832e-06	-3.812041241551668e-06	-8.556687132686826e-07	1.1388494378832926e-06	-3.3535297664278803e-06	-1.7099143427787573e-06	-1.9481456734616533e-06	2.151288018616931e-06	-6.506448790743077e-06	1.4164051863377085e-05	-2.1065575849663289e-07	4.057251376731329e-06	-5.382778528782184e-06	1.7909279034274016e-06	1.255655254024221e-05	-1.6500811444469012e-05	1.2374070120804268e-05	3.541779607002104e-06	1.0693780631866857e-06	-2.3259500395697046e-06	5.865717603368495e-06	-4.608966771776653e-07	-1.534817295496252e-06	1.3370545373682173e-07	7.360783707747479e-06	7.374712350281009e-07
Estrogen signaling pathway: CREB3***	-2.525709699620817e-07	7.1840611128188e-08	1.0060733087747219e-07	7.925724782640718e-08	1.4214331749976126e-07	8.509689839218276e-08	1.2142073262465957e-06	1.431760461612773e-06	1.4547437126238912e-07	4.584012482033936e-08	1.341885943299525e-07	2.3372035313693843e-07	-7.225948772846727e-07	1.7433549076740257e-07	4.255140510731726e-07	8.651316414061165e-08	-8.032276499684565e-08	-3.160957264415919e-08	1.5778638058327817e-07	-5.5308769546175015e-08	1.280899452135437e-07	-4.45386182328402e-08	7.205905561196684e-07	-1.1313999149271989e-06	2.40685639463392e-07	-2.4454405667275045e-08	8.79535749470076e-08	-5.693292988319628e-07	6.201646323387922e-08	6.929039868359636e-08	-6.699586373674156e-08	-4.978864987558854e-07	2.514985621394719e-07	1.6608421777189797e-08	-9.881252996681865e-09	-3.8520767698283947e-07	-5.876100919427261e-08	4.710868115472287e-07	9.58274533663059e-07	3.618348304074689e-07	-2.97585023282668e-07	2.863934369933375e-07	8.671777909533054e-08	1.6909315581234072e-07	1.2633087967869664e-08	-1.2571380491632092e-07	1.0417839678075834e-08	1.724160059444111e-07	-6.247739861010265e-08
Estrogen signaling pathway: CREB3	-5.172356507841475e-12	2.124703677452147e-12	5.7790832095832354e-12	-2.7205594943035294e-12	1.5894124672802364e-12	1.2194359101808753e-12	5.099514555997168e-11	-1.6433948324886003e-11	-2.671482318594274e-12	-1.909803095365197e-12	5.6410717686637215e-12	7.34387811892567e-12	-1.2820995044366244e-11	-4.446197685020231e-12	4.24741239794488e-11	1.0418277434181805e-12	-1.15787901939079e-12	2.873553354062452e-13	1.6204538424278009e-12	2.919256674453504e-12	3.2500708854195376e-12	1.6331868033632106e-12	3.4850652010387125e-12	8.042366437213548e-12	1.513359571970875e-11	-9.477999545444645e-13	-9.236828703658337e-13	-5.749768712087219e-12	-2.883544901594068e-12	1.7599870401533548e-12	-2.7444464466487586e-12	-8.273155625413924e-12	1.7647223354065066e-11	1.7622408045293282e-12	-1.4206862501764059e-12	-3.03290080041748e-11	1.0529673176385701e-12	2.3094195926105516e-11	1.2452117628124622e-10	2.7943600667247797e-11	6.966245381653066e-12	2.299594444556673e-12	3.8692596530991156e-12	6.971681308711784e-12	-3.2609028133652013e-13	2.289802362260052e-12	2.2440156308242419e-13	6.243732689223556e-12	1.4267384678797258e-12
Estrogen signaling pathway: ESR1 Estradiol-17beta	-3.056648234957543e-12	1.3069568312136464e-12	2.959247755885789e-12	-1.4642735866087317e-12	1.0421695197735753e-12	-5.912914312737229e-13	2.6346338700041127e-11	-1.3691366549467598e-11	-1.107899125201297e-12	-9.94924554933411e-13	2.7270146670939305e-12	4.630066441749033e-12	-8.331033491484814e-12	-2.3493937647019428e-12	2.060778859651293e-11	8.971674912032652e-13	-5.295173033467318e-13	1.3411833430424532e-13	8.530475486094584e-13	1.6135795260416288e-12	1.9356720923402405e-12	7.847777912798927e-13	2.327583829945185e-12	4.869844220017647e-12	8.840932767281395e-12	-6.216298732419389e-13	4.720835979251979e-13	-4.037144675621311e-12	-1.600219084138208e-12	9.53605916432572e-13	-1.0789782033587413e-12	-4.4121818865384895e-12	1.1865831470973278e-11	1.0436806964739014e-12	-7.567679947445323e-13	-2.027418721179166e-11	-6.218191937507674e-13	1.1818214152317142e-11	7.131439384704452e-11	1.5113756651733808e-11	3.0612672941575272e-12	9.32355775576177e-13	1.7254240871155566e-12	3.3683656369809454e-12	-1.824784157723326e-13	1.0091195857179717e-12	1.4315736614951605e-13	3.390781113525338e-12	7.12522245206867e-13
Estrogen signaling pathway: ESR1 FOS	-3.5577476666097008e-12	1.4248055283197932e-12	3.368949219052364e-12	-1.6813232975584957e-12	1.4178112816747933e-12	-6.343865065545622e-13	2.531830573024009e-11	-1.8885391179673627e-11	-1.0996615058470462e-12	-9.096022881517785e-13	2.8083155293521677e-12	5.938744207901763e-12	-1.0535203844220491e-11	-2.532643305741351e-12	1.74004450204307e-11	1.2515557941291789e-12	-5.988117608875137e-13	1.6978815131925654e-13	1.0568642008900589e-12	1.6904749413678842e-12	2.421281026866181e-12	8.32027686413009e-13	2.2252015166990413e-12	5.768322739126678e-12	1.0548700497930284e-11	-8.577995401818855e-13	5.001359593352736e-13	-6.066707964137969e-12	-1.6371365489973988e-12	1.0585935645885853e-12	-8.0436539018333e-13	-5.6826435584452856e-12	1.219549656076881e-11	1.0374479509928377e-12	-9.403523405824377e-13	-3.0592154070923174e-11	-1.191886282735352e-12	1.336523299997217e-11	8.229838793942979e-11	1.6426188213513535e-11	3.237482627267767e-12	1.479646305496131e-12	2.080463982222536e-12	4.174434740625778e-12	-1.7017384553223645e-13	1.1419792567538329e-12	1.407205130253931e-13	4.705234399232642e-12	7.47956235504362e-13
Estrogen signaling pathway: ESR1 Estradiol-17beta*	-3.056648234957543e-12	1.3069568312136464e-12	2.959247755885789e-12	-1.4642735866087317e-12	1.0421695197735753e-12	-5.912914312737229e-13	2.6346338700041127e-11	-1.3691366549467598e-11	-1.107899125201297e-12	-9.94924554933411e-13	2.7270146670939305e-12	4.630066441749033e-12	-8.331033491484814e-12	-2.3493937647019428e-12	2.060778859651293e-11	8.971674912032652e-13	-5.295173033467318e-13	1.3411833430424532e-13	8.530475486094584e-13	1.6135795260416288e-12	1.9356720923402405e-12	7.847777912798927e-13	2.327583829945185e-12	4.869844220017647e-12	8.840932767281395e-12	-6.216298732419389e-13	4.720835979251979e-13	-4.037144675621311e-12	-1.600219084138208e-12	9.53605916432572e-13	-1.0789782033587413e-12	-4.4121818865384895e-12	1.1865831470973278e-11	1.0436806964739014e-12	-7.567679947445323e-13	-2.027418721179166e-11	-6.218191937507674e-13	1.1818214152317142e-11	7.131439384704452e-11	1.5113756651733808e-11	3.0612672941575272e-12	9.32355775576177e-13	1.7254240871155566e-12	3.3683656369809454e-12	-1.824784157723326e-13	1.0091195857179717e-12	1.4315736614951605e-13	3.390781113525338e-12	7.12522245206867e-13
Melanogenesis: TYR*	-2.2626126948871524e-08	3.194518263045699e-09	6.3449481942815035e-09	-1.113162251887931e-07	-3.8477972244484015e-09	8.438551931582043e-09	9.459385169380648e-07	-1.4483830037250465e-07	2.236584731610647e-09	-5.963146870357814e-09	5.8476483571574e-09	-8.717209456028756e-08	2.3891013175326463e-08	-1.3406273032018634e-07	8.532376421135415e-07	8.014467294129964e-09	-5.031092484444185e-09	1.7918422430253243e-09	1.0082019327918552e-08	1.6634592280216497e-08	7.052594193237986e-09	3.6689576537223895e-09	4.5874869704836696e-08	-6.343092471276578e-08	2.103985964003456e-07	-1.4302652165771388e-08	9.555929383090111e-09	3.829735384383931e-09	-9.477560831638821e-09	6.54690342396658e-09	-4.4043230869866646e-08	-1.0624607047731221e-07	-1.0741095307577223e-07	-2.629971143686011e-09	-1.8392802844536563e-09	-5.614581618650233e-08	-7.849524913621846e-09	2.796720278199561e-08	-7.402026933497679e-07	1.2145560270682688e-07	-1.906446191029575e-07	2.096396309892778e-08	-9.259643777480596e-09	-1.1906988874648802e-08	1.3520061564067168e-10	6.709436930815544e-09	5.035306538044188e-09	3.394762255013641e-08	1.1646740357057041e-08
Melanogenesis: TYRP1	-5.2884115528251025e-08	-1.759585119489915e-08	-3.6142291211850944e-08	-1.432570166759889e-07	3.709133434162209e-08	-1.8950599880048157e-08	9.466290602784764e-07	3.0670394962751255e-07	-1.6843645979599114e-08	-2.683957381147152e-08	3.385243459120059e-08	-1.0481247525325557e-07	8.798271376592387e-08	-1.5688923178993145e-07	9.349024596622916e-07	2.5041359690710523e-08	2.6730658045237584e-08	1.1360695296218869e-08	4.2580156230511584e-08	3.340067119090893e-08	4.9754785222614796e-08	-4.2516565443235434e-08	-7.299043146452255e-08	2.0429281273330707e-07	2.274654228117764e-07	-1.3709465088326306e-08	-4.3903168800684105e-08	2.4555167788588475e-08	-3.338693598290971e-08	3.151209785987427e-08	-6.688037169374834e-08	-1.1271402023870325e-07	3.11479152838e-07	3.988557050006804e-08	-1.6341264489991228e-08	7.287495041358946e-07	1.936256430441088e-08	8.579254511578899e-08	1.01654091748803e-06	1.4397818483313885e-07	-1.8502632683568133e-07	3.5069947320300244e-08	-2.277215805677732e-08	5.967071216343251e-08	-1.0560047317299724e-09	3.237681833183145e-08	5.552582206860205e-09	5.724795119843795e-08	2.9130171175017973e-08
Melanogenesis: DCT	-3.6266207859419294e-08	1.0786998434484078e-08	8.634510848302737e-08	-1.341404302185736e-07	2.5423834117029563e-08	-1.8136010533940676e-08	6.74041751899516e-07	8.499983978132036e-07	-1.5828273730685113e-08	-1.8671963690212872e-08	2.4056925505169805e-08	-8.183487916047885e-08	6.356865488587614e-08	-2.016048320803314e-07	6.644276359415566e-07	2.7123599403876225e-08	2.0803889663682875e-08	5.5177744601881605e-09	-2.4370823876504152e-08	4.810190743193137e-08	-2.7231680221063138e-08	2.3612438650957096e-08	-1.0741124325108882e-07	2.054972177635161e-07	2.164940413886241e-07	5.315562242731868e-09	1.9855678491320464e-08	2.8693580145529694e-08	-3.4093581735426704e-08	2.025830993312304e-08	-5.68170930961061e-08	1.24134380722073e-07	-3.769298218730371e-07	4.589722127542299e-09	-4.4234245868378035e-09	3.616298144813285e-07	-3.035796824191119e-08	1.2886428310484116e-07	1.2581426465816465e-06	1.403068733425046e-07	-2.011039269713403e-07	4.2814159469521615e-08	-2.8414866232384032e-08	6.744138125403886e-08	-4.150146006225694e-09	1.902348879532277e-08	6.394026552346697e-09	1.0504864636611029e-07	2.2085445485745372e-08
Prolactin signaling pathway: CCND1	4.4687108948750535e-09	-1.8094069799182062e-09	-2.461561975865997e-09	1.0023053024255144e-09	1.1296826823816475e-09	-9.78792513558889e-10	1.3041009743314971e-08	-2.3045413003419093e-08	-2.1384733802668296e-09	6.196383479482634e-10	-4.311026863864955e-09	4.878887456659002e-09	-1.7451472972001862e-08	-3.571860690120661e-09	1.4101176827540853e-08	-6.606768908724094e-10	-6.206591947013452e-10	-9.085858457931651e-10	-1.6045352198211147e-09	7.964302412231631e-10	1.381159213398924e-09	1.7644087104332335e-09	-2.1968915689086303e-09	-2.266064676008272e-09	-3.1575587361491717e-09	5.209014357792585e-10	3.3543377481581293e-09	-2.9056068856680574e-08	1.1151020526817378e-09	-1.288122850332988e-09	-2.1907498417274077e-09	6.600748808580889e-09	-3.400193135816203e-09	-4.695006737684247e-10	6.451765588516184e-10	-1.2952644820213676e-08	1.292587502479574e-09	8.438026744737024e-09	1.2561190414589862e-08	6.2961079345976805e-09	-1.5890773565143526e-09	8.942693959411411e-10	2.0984686918863654e-09	5.346411305431176e-09	2.378600209573478e-10	-1.822819043654077e-09	2.3316895628023326e-10	2.0205333368957358e-09	-2.523685101323904e-09
Prolactin signaling pathway: CCND1*	7.430351005526271e-09	-2.4629194201463373e-09	-3.270110184964221e-09	2.0628894794794874e-09	1.5465402908502624e-09	-1.4960543137180983e-09	1.0480626686257267e-08	-2.954531312040081e-08	-2.9212530168225956e-09	1.597436178674419e-09	-6.6787006508968246e-09	1.0135604701961112e-08	-2.9736216484927324e-08	-6.572005717967082e-09	6.0151811385072314e-09	1.2412661485360622e-09	-9.166436587175151e-10	-1.232285605512599e-09	-3.1772613192107046e-09	1.7022215777306823e-09	3.705780280647978e-09	3.2276469956828563e-09	3.833111659801862e-09	-5.333597985874647e-09	-5.6633319245901985e-09	9.168255204218667e-10	5.004096137244433e-09	-4.2705082412659375e-08	2.443222026481785e-09	-2.135738680081176e-09	-2.3444521777643334e-09	1.0323164763214425e-08	-1.3602485159434149e-08	-6.755096176493483e-10	1.3226086688589671e-09	-2.3644588384067124e-08	1.7995166625128076e-09	2.014353601607313e-08	1.956151638008265e-08	1.1271434697033557e-08	2.4819070584136763e-09	2.760958417899604e-09	5.285751632691893e-09	1.2104539085208858e-08	3.644722940835508e-10	4.25452153679935e-09	-2.3670176414273687e-10	8.854590847696421e-09	-3.2802486934636847e-09
Thyroid hormone signaling pathway: ATP1B4	-7.708409757757318e-06	3.0876153806922425e-06	4.652674876644655e-06	-2.6581009568436576e-06	-2.665318539306221e-06	2.34908267056262e-06	-3.835557611823762e-05	0.0001338420504397	-3.008472699011571e-06	-3.450124465326329e-06	5.954054936771775e-06	-1.2354502195426692e-05	1.4194498492116809e-05	2.656281850984397e-05	1.813102237483033e-05	2.146262777193578e-06	2.809383507879413e-06	9.951762745126156e-07	8.077264523887931e-06	5.773111715383619e-06	-4.942732825665141e-06	-2.954959772038317e-06	2.1859101470113567e-05	2.3207264043597367e-05	-7.260432992928144e-06	1.1158090338195324e-06	-4.046737168301141e-06	2.29526669194838e-05	-4.655291681249472e-06	5.540599445495562e-06	3.3636848134295363e-06	-9.766228338289463e-06	-1.936387574592152e-05	6.450208960273847e-07	-3.45322647343913e-06	8.800330429439211e-05	4.095232032309247e-06	3.5009420647417435e-05	9.882607028751488e-05	1.0788016012483292e-05	1.046659036215915e-05	5.459549800640409e-06	5.778672645073461e-06	2.06360843256577e-05	-6.340868772314875e-07	4.670839487490628e-06	-5.635712602280389e-07	4.738611422041664e-06	3.852995746274988e-06
Thyroid hormone signaling pathway: STAT1	-5.344814236728817e-06	1.5215138863966297e-06	1.986051103622044e-06	1.8824709941254405e-06	-3.0571167437521858e-06	3.5508933349600936e-06	-2.4927381133916596e-05	9.847355159110353e-05	2.7549228275700705e-06	-6.672474521530273e-07	2.93060316103181e-06	-5.526747568786149e-06	-4.271140696915903e-06	1.3112297935161587e-05	-1.1316798800335776e-05	-2.368015780545691e-06	1.3101719882780176e-06	-6.565633142421501e-07	2.6045010660311853e-06	-3.1199873929537995e-06	-4.622682241000596e-06	-2.695074157933392e-06	1.087634942801489e-05	-9.544532231414306e-06	3.3353058254225605e-06	7.428128335938678e-07	-1.42469300801047e-06	8.526523480369071e-06	-9.420688768049954e-07	1.933770294884472e-06	2.6759780529113027e-06	-4.4966916055330535e-06	-2.4669221511906345e-05	2.7477934805700325e-07	-1.6322255498002414e-06	4.345131400999457e-05	1.1301073367187745e-06	1.0943336749975786e-05	3.566623335495454e-05	6.25577148242183e-06	-3.3064655271593324e-06	3.3930056079108896e-06	4.129325667431892e-06	7.374735018984851e-06	-2.426442448558658e-07	-3.00636513176513e-06	-2.9914025777298935e-07	-9.21661526891686e-06	1.8188998428620957e-06
Thyroid hormone signaling pathway: TP53	-5.497301327695781e-06	2.503072046154519e-06	2.347375137876932e-06	1.3393449386820487e-06	-1.6224654675618483e-06	2.154183621898497e-06	8.992110749797037e-06	6.985792868438772e-05	2.6190722655215145e-06	-6.888000325887929e-07	2.511727460936877e-06	-3.111714620033428e-06	-5.10568311247622e-06	8.337410226162262e-06	2.2908032963306792e-05	-8.609053132706554e-07	8.925659329531732e-07	-5.2645018243351e-07	2.0384020238150508e-06	-2.122241096283913e-06	-4.01749202402646e-06	-2.481881828044535e-06	1.1553421727103547e-05	-1.1595216136967378e-05	4.5893034255305445e-06	3.4814492183387826e-07	-1.342438633161196e-06	4.171151830047164e-06	-1.007920397407661e-06	3.530741173661266e-06	-8.090543717860424e-07	-6.545076126750859e-06	-1.1590345304667044e-05	-3.825132163415174e-07	-1.1709710344521577e-06	2.494254340002398e-05	1.0881029693023112e-06	1.246250479459391e-05	3.875815425504943e-05	9.012368628751225e-06	-2.5546851865527594e-06	3.373873252698861e-06	3.4610445918870324e-06	4.581945476614414e-06	-1.8415942239575957e-07	-2.292710630598421e-06	-1.767942731582672e-07	-4.637415282845633e-06	1.853959893969396e-06
Thyroid hormone signaling pathway: ESR1	-6.056723226512392e-06	1.4359550003667283e-06	1.2787396047606036e-06	2.269610650750523e-06	4.705769511870937e-06	-1.1768697983064837e-06	-2.8072296106715304e-05	4.782271196322427e-05	-1.5013408361251246e-06	1.3722539551627802e-06	2.804242104645161e-06	5.615254328890265e-06	-1.4007440054726025e-05	5.653909997180571e-06	-3.326132881661878e-05	2.730096198443046e-06	-1.843658711737981e-06	-4.418010613054237e-07	2.9343824028863104e-06	1.8543072739835395e-06	2.941986899421966e-06	1.2898772579015898e-06	1.2823960739281898e-05	-2.343614557655002e-05	4.896186758330785e-06	-3.680311692908565e-07	3.0863462989961086e-06	-1.1889611256600651e-05	2.381149954787324e-06	-1.622682728499326e-06	3.833122816414143e-06	-8.090959483827476e-06	8.674282392900388e-06	-2.579479734830191e-07	-1.5510774534373489e-06	9.588844625431482e-06	-3.897692350776188e-06	3.409717175128928e-06	5.875266653180325e-05	6.623328330873397e-06	-8.11641827744592e-06	5.837557900428726e-06	1.72820053488409e-06	3.038473406771566e-06	2.664285219825064e-07	-1.997969300738925e-06	2.4859516987297665e-07	9.410058550966413e-06	-1.22881329940065e-06
Thyroid hormone signaling pathway: THRB	-4.997045903648362e-06	1.2458976696342495e-06	3.1573297507099944e-06	1.764164688370011e-06	-2.59626769071747e-06	-2.376708815243316e-06	-3.172888224787178e-05	0.0001579079280339	-4.035098189560078e-06	3.888014485669533e-07	4.978554813106228e-06	-5.395864675890204e-06	3.5464773428127845e-06	1.136874447319603e-05	-1.1612527855034317e-05	1.494751689524723e-06	-1.2496280275252447e-06	8.677886263121544e-07	8.23239001114576e-06	4.946401531988621e-06	-3.733213116457772e-06	2.24470599519308e-06	2.012337488757017e-05	-1.835279978244911e-05	3.3489807218124726e-06	1.335933979527192e-06	-2.524289102149759e-06	3.77316984117975e-06	1.068994279303644e-06	4.038028188306649e-06	3.752132442505484e-06	-4.862643839703822e-06	-1.552332009385032e-05	-5.621106413428707e-07	-1.2806999187022416e-06	8.127576977533956e-05	1.4888164782688318e-06	2.1709440824676948e-05	5.52514352235801e-05	-6.968872048054915e-06	-3.635912019240156e-06	6.945281563787377e-06	4.494274695727841e-06	1.433242951415358e-05	2.404214969745512e-07	2.6015840583338764e-06	-2.2199474252241293e-07	1.1382736670013457e-05	2.6511045419236007e-06
Oxytocin signaling pathway: Arachidonate	5.222656651291323e-08	-1.7720612990136162e-08	-2.5612069700071983e-08	1.4057851859387736e-08	1.1859468849879889e-07	4.1915324310319195e-08	9.611178253779462e-08	-2.2411898649476965e-07	-2.4081703696705813e-08	5.860119013405979e-09	-2.8514003023931153e-08	-9.12037216333239e-08	5.7792348170599514e-08	-9.121649176194115e-08	8.279559158482444e-08	-1.2853082371985428e-08	-4.708480198534931e-08	6.668693355957074e-09	2.2598403453451717e-08	1.630909258690139e-08	9.029201008824279e-08	-2.2509541189717103e-08	-8.033388548087445e-08	-1.5593910181243522e-07	2.4678342503234666e-08	-6.447960168956176e-09	7.982097749574683e-08	1.245427705366718e-07	1.3435288037320796e-08	-2.355712757758532e-08	-7.392557172929398e-09	4.356331920014617e-08	-7.699579317869356e-08	-7.732542554174763e-09	-9.279216644376128e-09	-1.2503565066558582e-07	-2.5289050613670025e-08	-2.5987667680858156e-08	-1.1928497750730645e-07	-1.2091090211087966e-07	-3.1715216398592283e-08	-7.637849660060787e-08	-5.1558170291679136e-08	1.4826627626212872e-08	3.164881146112858e-09	2.4499356224709603e-08	-1.4198599656578886e-09	2.0832134301887933e-08	-1.0895751695181096e-08
Oxytocin signaling pathway: PTGS2	-5.188844439216347e-06	1.7058076577039972e-06	7.773465117666624e-06	-2.353161474361091e-06	-2.084720633452808e-06	1.81931966474482e-06	1.5168886322731469e-05	0.0001277999113772	1.8660468460729671e-06	-1.139167479582063e-06	3.090039849206249e-06	-5.649235432912626e-06	-1.369367278588755e-05	1.1138963795745912e-05	8.09825666699842e-06	2.4373909854326284e-06	-2.214430042614117e-06	-1.0725310596177426e-06	3.535100594742573e-06	2.559358890745674e-06	3.5227570163906197e-06	-2.976191673352107e-06	4.4035457723395966e-06	8.837531055522354e-06	9.50168087475148e-06	2.455337061173216e-06	-1.907369102433701e-06	-8.987016787107868e-06	-1.5803615509608674e-06	-2.5946199925327094e-06	3.782939624539018e-06	-2.718047535879264e-06	2.309777706815931e-05	2.328513874222009e-06	-2.4471789261467544e-06	4.112462886942202e-05	-4.346612936587572e-06	2.555178647022074e-05	0.0001053401552736	1.3861211822348009e-05	-6.995192897370628e-06	4.92994800636982e-06	5.9507389224474985e-06	7.238318260214511e-06	6.95848322608551e-07	5.858018765253861e-06	-2.948803145212133e-07	6.433176983875462e-06	1.593736855868802e-06
Oxytocin signaling pathway: MEF2C	-1.0571201701272191e-05	2.2434571147533336e-06	3.333522321974233e-06	-3.5000859683390013e-06	4.086033992769433e-06	-2.0713656886067346e-06	-4.302868183068965e-05	6.740266012752867e-05	3.300841405665128e-06	-2.0449541284824555e-06	3.529781438706232e-06	4.194797613320648e-06	-7.374462103239325e-06	-9.98735612648642e-06	-2.4757498361709133e-05	5.21505496744601e-06	-1.672403811233695e-06	4.620476420892714e-07	9.22357027975676e-06	-1.9117953858930177e-06	4.684655861604245e-06	1.7708884747931728e-06	1.4205799603886098e-05	-2.2067374929528465e-05	4.177250934278134e-06	4.662481436305743e-07	-3.5229507347401643e-06	-4.508337053364029e-06	-3.757019078374088e-06	3.184340943185425e-06	5.1776108481908905e-06	-7.109347776254377e-06	1.4957896339886633e-05	-2.83942798390617e-07	-2.263365818955965e-06	2.3628552590789036e-05	-4.0112679783884295e-06	1.3124803009347485e-05	6.668076465713177e-05	8.144439397366164e-06	-6.639727270611616e-06	5.708934873919261e-06	-3.0559713922434305e-06	3.852387207509428e-06	-2.893000934962805e-07	-3.1139574415608297e-06	1.5621566633226988e-07	4.584410274892812e-06	2.9292828496558085e-06
Oxytocin signaling pathway: JUN	-6.961126675612908e-06	2.915211856970227e-06	6.7855216518725765e-06	-4.342777403681509e-06	-1.4519066134690517e-06	2.36655994184118e-06	1.4966187559746058e-05	3.958954260333397e-05	1.8730937491004213e-06	-2.309625368531408e-06	3.611056927044593e-06	6.02599743797544e-06	-1.4901763317972508e-05	-6.79382845320719e-06	3.0374220427383653e-05	1.3594442064414218e-06	-2.018234492621087e-06	-8.988206683753266e-07	3.65136751715412e-06	2.6731215094849737e-06	4.423103222999078e-06	1.6498345115261157e-06	8.225324544467039e-06	-1.454251780812133e-05	1.7896974564831406e-05	1.689211598304194e-07	1.4507643556638544e-06	-7.2645182185651585e-06	-2.70389520196394e-06	-1.87837015917702e-06	-1.987611034114843e-06	-9.783503331464757e-06	-1.997793629554102e-05	5.217094828991127e-07	-8.760925893860539e-07	-6.9722051006995495e-06	-1.6535515085637868e-06	2.3402505859004096e-05	9.493731430090708e-05	1.839148452771124e-05	-8.430550088506146e-06	4.086407732613262e-06	3.0148221031972e-06	5.663117151638279e-06	-5.913039020786764e-07	2.641015543731148e-06	4.498630440059306e-07	1.2324146215469398e-05	1.826567687098825e-06
Oxytocin signaling pathway: CCND1	-6.132078883616692e-06	1.3814587711828226e-06	2.5621427755548102e-06	-3.2434451943018927e-06	-3.3299476214224157e-06	2.101506975799026e-06	6.15868995471455e-05	3.7929601945235175e-05	-1.4882034920724958e-06	-1.194402320732376e-06	3.366998888401871e-06	-6.94567658428194e-06	-1.2364426452522925e-05	-1.065625612000571e-05	5.531027575702424e-05	-1.6093125810944628e-06	-8.501341688656158e-07	9.445899922545886e-07	2.671250822978718e-06	3.1397240054636077e-06	5.430630625035287e-06	-2.427235209626789e-06	1.1579037955826655e-05	-1.3390675653345832e-05	1.664450214263915e-05	6.6418563619669e-07	1.5282910793048058e-06	-4.635131212759118e-06	-1.419078820393658e-06	2.158582960675689e-06	-3.843114298987528e-06	-1.1124810771744628e-05	-2.4735269021014225e-05	4.815691070869011e-07	-9.063757080598366e-07	1.4687253369220046e-05	2.936809563809349e-06	2.535114653954857e-05	9.709145382241626e-05	2.3205636166146443e-05	-4.736052638523232e-06	4.787064922316407e-06	5.527591130859648e-06	1.020466290727324e-05	-3.3751706229249816e-07	5.904580627815015e-06	5.085716010039509e-07	1.568762993087906e-05	1.926409001787004e-06
Oxytocin signaling pathway: FOS	-4.359837115042589e-06	2.6432874215143825e-06	6.214814394302822e-06	-5.708214658222191e-06	-2.083940166572009e-06	-3.024503725258384e-06	3.789487421038585e-05	5.726030703767193e-05	-2.1914657980794927e-06	-2.7538625944183645e-06	5.885483234870064e-06	-6.268462744287095e-06	-1.6832538308916168e-05	-7.445146576600631e-06	4.831070317833946e-05	2.585087577292485e-06	-2.6561440238690715e-06	-9.49922019810392e-07	3.039475015819401e-06	4.951509107680068e-06	4.295775456588901e-06	1.947245665268051e-06	1.1023365855750454e-05	-1.3918487938033698e-05	2.5802345889141884e-05	8.378533333676027e-07	3.252936131858129e-06	-1.299184190907185e-05	-3.0494893520118857e-06	-2.351224998386898e-06	-2.2455032242356867e-06	-1.0390001685417302e-05	-8.708180926588526e-06	-4.309873958933282e-07	-1.3093884230335316e-06	1.0923259714235378e-05	-2.90588257462952e-06	2.760170628376605e-05	0.0001267934929812	2.287367440355302e-05	-1.3517770336643893e-05	5.677586939371215e-06	4.704344463181757e-06	7.123880203726145e-06	-7.740935332119568e-07	3.948391041377766e-06	7.551272628899857e-07	1.0078314073592186e-05	1.7529979898995695e-06
Oxytocin signaling pathway: ELK1	-4.407785713015224e-06	2.3449484590741136e-06	2.9822752050446102e-06	-1.988513837893975e-06	-3.234779233395242e-06	3.225274608314112e-06	1.5095604077830137e-05	3.625842589970494e-05	1.99165071305847e-06	-1.029357779116219e-06	2.5202465833911413e-06	-3.826227655949887e-06	-5.838941447862461e-06	1.2677143769520248e-05	3.101386112463497e-05	-1.5004440976838858e-06	-1.9924338603260503e-06	-6.612079515875769e-07	3.5871513536089152e-06	1.0814412197119774e-06	-1.819032985960264e-06	-1.2360977363329089e-06	1.1936887380256645e-05	-1.4721318178169742e-05	6.965070818587692e-06	2.1312240520992886e-07	-7.334472352090894e-07	-2.938282345008812e-06	-1.2075384046336286e-06	2.077780070903013e-06	-8.709261344434298e-07	-3.853452252350225e-06	-7.7425082735019e-06	3.185257624855844e-07	-1.0744993923380671e-06	1.0891641935158848e-05	-1.6739168091430229e-06	4.146733481735724e-06	2.2964519090861464e-05	6.922428425423511e-06	-7.496932753968263e-06	-3.750829685719718e-06	-3.63003283316044e-06	-5.462889990602269e-06	-2.0800181889295086e-07	-1.6888559046549949e-06	4.136931967200145e-07	3.862958908307096e-06	1.2681156003651326e-06
Aldosterone-regulated sodium reabsorption: SCNN1A	1.1540560607580718e-06	-2.2261542016692918e-07	2.700223860304934e-07	-5.356850031899479e-07	4.466669280129916e-07	-7.213718501533147e-07	-1.2826561678262071e-05	-2.128705801464521e-05	-4.386191370311281e-07	-2.1546155687595357e-07	7.213550693137152e-07	3.314056392546371e-06	-3.8458179749581805e-06	-4.176488750691148e-06	-7.298209983734274e-06	5.411198804521417e-07	-1.6272170522619666e-07	-1.672555710767278e-07	-3.550726553949923e-07	6.418477214926141e-07	1.4408390036044198e-06	4.323259922463164e-07	-2.7564744010117348e-06	2.290487816595352e-06	-1.9765522102008285e-06	4.22309265747384e-08	1.0247491312877455e-06	-4.139368535621135e-06	-3.122231101391324e-07	-1.0320616571959725e-06	6.788130601327253e-07	8.095729578787227e-07	5.438084637137388e-06	1.0429789308513277e-07	3.267850245569101e-07	-1.5480051389866132e-05	8.825977185000462e-07	1.9542053451713184e-06	-5.768067801921201e-06	3.2931767825859142e-06	1.2518118528818725e-06	-8.395209971638486e-07	-7.756914286689748e-07	9.490145094525892e-07	-9.021534241963345e-08	4.867391399086811e-07	6.214901374509849e-08	1.3453130080991738e-06	-6.228123469696144e-07
Aldosterone-regulated sodium reabsorption: KCNJ1	5.56246005702639e-06	1.6817765528925872e-06	-4.552819339792878e-06	-5.566569785678639e-06	-2.6396599321064782e-06	-2.458636270424992e-06	2.854272516004897e-05	-7.995263029324754e-05	-1.8652484292889824e-06	-3.1253781365468373e-06	1.8030389384155367e-06	-7.1420443567281645e-06	9.738489742187636e-06	4.565920888545401e-05	2.5827316831028862e-05	1.3830277262569658e-06	-1.2223814897998973e-06	1.2508195615111345e-06	-3.7264958252512463e-06	3.813993694649579e-06	-1.0014146497959167e-05	3.581548528095277e-06	1.6908886058811766e-05	2.3656402323123677e-05	4.22642449977434e-06	-5.101935166092159e-07	-1.563492113614448e-06	1.3599399647028873e-05	-2.356240277036925e-06	2.389441025273249e-06	2.402462892194441e-06	-2.9873513865397205e-06	2.4651605674982995e-05	1.22625689958093e-06	-4.809752955968314e-07	-3.5921135848177e-05	1.96148735662868e-06	7.832656282899513e-06	3.851607198999014e-05	-7.999950828900756e-06	-8.657511975090412e-06	3.50433776399308e-06	-5.216976319816465e-06	3.027895281241984e-06	-6.107359770932496e-07	3.354964552744054e-06	3.2975256983525575e-07	4.206573399857969e-06	1.398479434796543e-06
[truncated: 662 more columns]
